# Supplementary material for: The Paramecium Germline Genome Provides a Niche for Intragenic Parasitic DNA: Evolutionary Dynamics of Internal Eliminated Sequences
Source: PubMed Central journal article supplement (PMC3464196; doi:10.1371/journal.pgen.1002984), 2012-10-04

### A MIRAA

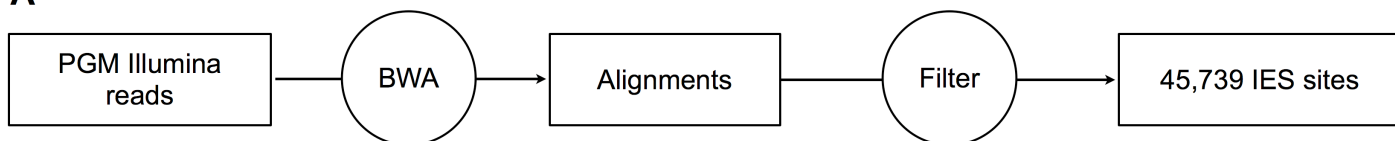

### B MICA

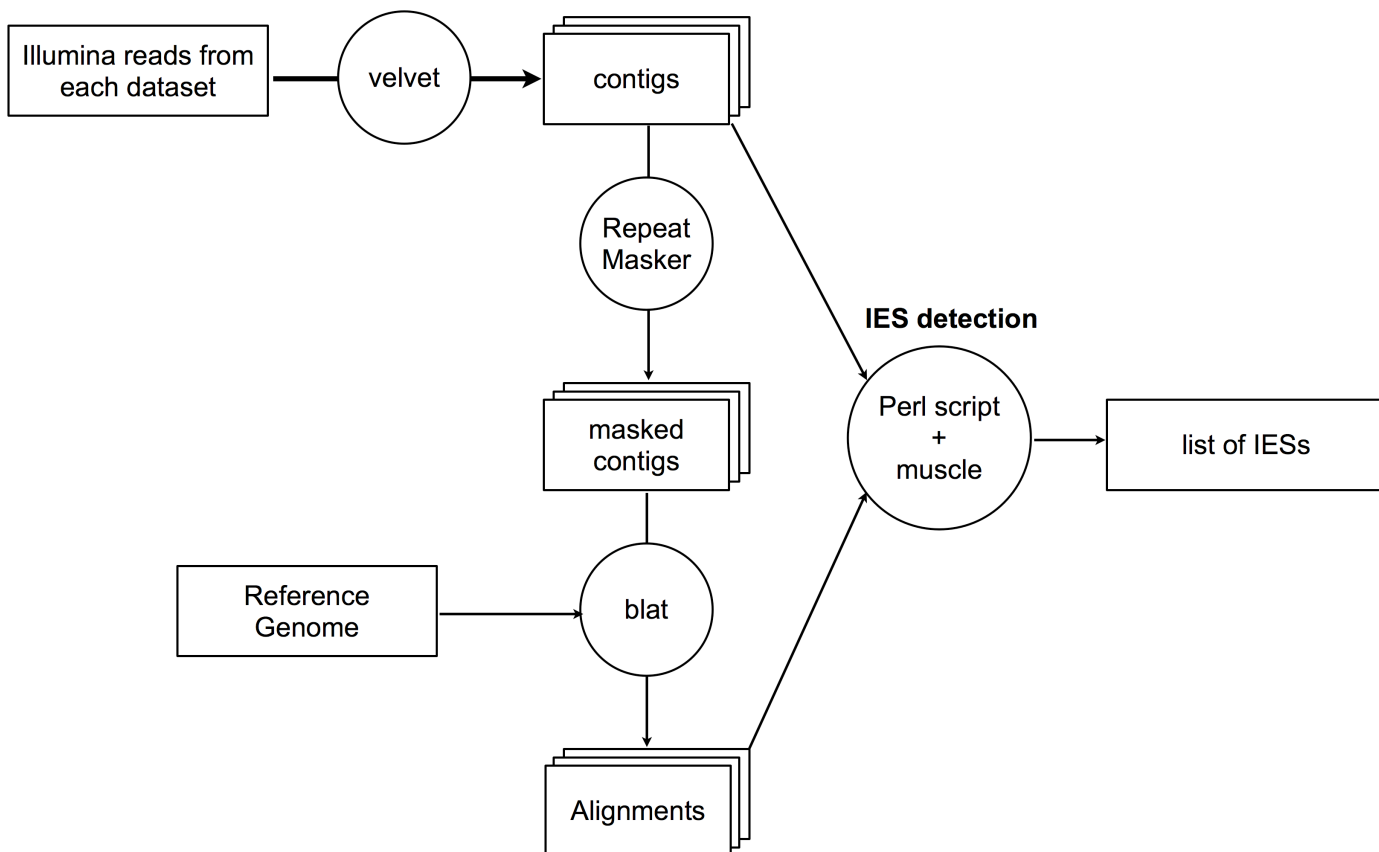

### C

| Dataset                      | No. of reads | No. of IESs   |
|------------------------------|--------------|---------------|
| All PGM reads                | 126 M        | 44,207        |
| Reads at least one no match  | 32 M         | 44,211        |
| Reads without MAC junc MIRAA | 121 M        | 44,269        |
| Remove all MAC junc          | 121 M        | 43,286        |
| <b>Merge</b>                 | -            | <b>44,928</b> |

### D

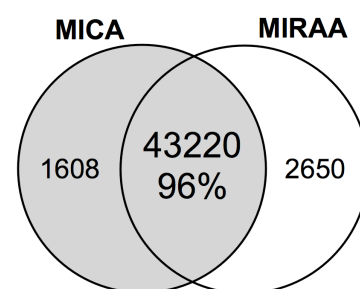

Supplement: pgen.1002984.s001.pdf [file pgen.1002984.s001.pdf]
