# Supplementary material for: The Paramecium Germline Genome Provides a Niche for Intragenic Parasitic DNA: Evolutionary Dynamics of Internal Eliminated Sequences
Source: PubMed Central journal article supplement (PMC3464196; doi:10.1371/journal.pgen.1002984), 2012-10-04
Supplement: pgen.1002984.s009.pdf [file pgen.1002984.s009.pdf]

| Type         | Scaffold       | Position | MAC PCR product |          | MIC PCR product |          | IES size   | Sequenced |
|--------------|----------------|----------|-----------------|----------|-----------------|----------|------------|-----------|
|              |                |          | Expected        | Observed | Expected        | Observed |            |           |
| MICA & MIRAA | scaffold51_1   | 292806   | 369             | ~375     | 454             | ~460     | 85         | no        |
| MICA & MIRAA | scaffold51_10  | 240455   | 355             | ~360     | 432             | ~450     | 77         | no        |
| MICA & MIRAA | scaffold51_11  | 141916   | 364             | ~375     | 573             | ~560     | 209        | no        |
| MICA & MIRAA | scaffold51_12  | 366211   | 350             | ~350     | 377             | ~375     | 27         | MIC       |
| MICA & MIRAA | scaffold51_14  | 132164   | 361             | ~360     | 408             | ~410     | 47         | no        |
| MICA & MIRAA | scaffold51_2   | 623719   | 348             | ~350     | 404             | ~410     | 56         | no        |
| MICA & MIRAA | scaffold51_3   | 554680   | 367             | ~360     | 403             | ~400     | 36         | MIC       |
| MIRAA        | scaffold51_1   | 206570   | 322             | ~330     | ND              | ~350     | *31-2-28   | MIC       |
| MIRAA        | scaffold51_11  | 460330   | 375             | ~400     | ND              | ~450     | *29-1-29   | MIC       |
| MIRAA        | scaffold51_13  | 596382   | 347             | ~350     | ND              | ~400     | *28-2-30   | MIC       |
| MIRAA        | scaffold51_14  | 210046   | 366             | ~375     | ND              | ~800     | ND         | no        |
| MIRAA        | scaffold51_15  | 406155   | 369             | ~375     | ND              | ~650     | ND         | no        |
| MIRAA        | scaffold51_16  | 361775   | 350             | ~350     | ND              | ~400     | *26-3-26   | MIC       |
| MIRAA        | scaffold51_9   | 114280   | 342             | ~350     | ND              | ~460     | *57-1-46   | MIC       |
| MIRAA        | scaffold51_56  | 454715   | 332             | ~340     | ND              | ~3200    | ND         | no        |
| MIRAA        | scaffold51_47  | 324362   | 358             | ~360     | ND              | ~410     | *47-4-29   | MIC       |
| MIRAA        | scaffold51_34  | 257109   | 394             | ~400     | ND              | ~650     | *106-6-148 | MIC       |
| MIRAA        | scaffold51_41  | 194697   | 378             | ~400     | ND              | ~475     | *28-3-58   | MIC       |
| MIRAA        | scaffold51_26  | 330923   | 345             | ~360     | ND              | ~500     | 146        | MIC       |
| MIRAA        | scaffold51_35  | 149456   | 358             | ~375     | ND              | none     | ND         | no        |
| MIRAA        | scaffold51_43  | 182962   | 366             | ~400     | ND              | none     | ND         | no        |
| MIRAA        | scaffold51_37  | 205471   | 343             | ~350     | ND              | none     | ND         | no        |
| MIRAA        | scaffold51_33  | 261960   | 349             | ~350     | ND              | none     | ND         | MAC       |
| MIRAA        | scaffold51_28  | 472294   | 358             | ~400     | ND              | none     | ND         | no        |
| MICA         | scaffold51_179 | 88164    | 333             | ~340     | 360             | ~375     | 27         | no        |
| MICA         | scaffold51_184 | 64423    | 308             | ~325     | 353             | ~350     | 45         | no        |
| MICA         | scaffold51_188 | 26049    | 351             | ~360     | 378             | ~380     | 27         | no        |
| MICA         | scaffold51_188 | 29158    | 346             | ~350     | 390             | ~400     | 44         | MIC       |
| MICA         | scaffold51_71  | 364423   | 373             | ~390     | 400             | ~480     | 27         | no        |
| MICA         | scaffold51_87  | 125232   | 358             | ~360     | 385             | ~390     | 27         | no        |

**Table S2. Molecular validation of some predicted IESs and IES insertion sites.** IES insertion sites predicted by one or both methods (MICA and/or MIRAA) were tested using PCR as described in Materials and Methods. For each tested MICA prediction, the MIC PCR product was of the expected size, and for those that were sequenced, the expected IES sequence was found. For insertion sites predicted only by MIRAA, PCR amplifications show unexpected results : IESs very close one to another, spaced by only one or a few nucleotides, were often found. Out of 17 tested MIRAA predictions, 8 appeared to be such tandem IESs, 1 appeared to be an 146 bp IES, in 5 cases we did not obtain a MIC amplification product, and in the remaining 3 cases, the MIC amplification product was not sequenced. Failure to detect a MIC product does not exclude the presence of a large IES, given the PCR conditions that were used.

Legend.

\* Tandem IESs with size format : IES\_1\_size – space\_size – IES\_2\_size.

~ Approximate size of the corresponding band in the migration gel.

ND (Expected MIC): we could not predict any size for a MIC amplification because no *a priori* prediction was made on the presence of a MIC sequence.

none (Product MIC): no amplification other than the MAC product could be observed.

ND (IES size): the MIC product was not sequenced or its size could not be predicted.
