# Supplementary material for: The Paramecium Germline Genome Provides a Niche for Intragenic Parasitic DNA: Evolutionary Dynamics of Internal Eliminated Sequences
Source: PubMed Central journal article supplement (PMC3464196; doi:10.1371/journal.pgen.1002984), 2012-10-04
Supplement: pgen.1002984.s010.pdf [file pgen.1002984.s010.pdf]

| <b>Description</b>           | <b>GenBank Accession N°</b> | <b>Scaffold</b> | <b>Position</b> | <b>% ID</b> | <b>known IES length (bp)</b> | <b>IES length (this study) (bp)</b> | <b>COMMENT</b> |
|------------------------------|-----------------------------|-----------------|-----------------|-------------|------------------------------|-------------------------------------|----------------|
| ND7_IES4_mic                 | gi 193480009                | scaffold51_5    | 597595          | 100         | 29                           | 29                                  |                |
| ND7_IES3_mic                 | gi 193480009                | scaffold51_5    | 595021          | 100         | 26                           | 26                                  |                |
| ND7_IES2_mic                 | gi 193480009                | scaffold51_5    | 594919          | 100         | 76                           | 76                                  |                |
| ND7_IES1_mic                 | gi 193480009                | scaffold51_5    | 594675          | 100         | 28                           | 28                                  |                |
| IESsm19-576_mic              | GB                          | scaffold51_8    | 407305          | 100         | 66                           | 66                                  |                |
| IES51pwB-658_mic_alternative | gi 10716831                 | scaffold51_19   | 587496          | 100         | 146                          | 146                                 |                |
| IES51pwB-427_mic             | gi 10716831                 | scaffold51_19   | 587727          | 100         | 44                           | 44                                  |                |
| IES51pwB-2226_mic            | GB                          | scaffold51_19   | 587126          | 100         | 66                           | 66                                  |                |
| IES51PAK11-991_mic           | gi 3916119                  | scaffold51_5    | 724979          | 100         | 28                           | 28                                  |                |
| IES51PAK11-294_mic           | gi 3916119                  | scaffold51_5    | 725700          | 100         | 45                           | 45                                  |                |
| IES51PAK11-1557_mic          | gi 3916119                  | scaffold51_5    | 724388          | 100         | 44                           | 44                                  |                |
| IES51PAK1-991_mic            | gi 3894330                  | scaffold51_16   | 560295          | 100         | 27                           | 27                                  |                |
| IES51PAK1-1557_mic           | gi 3894330                  | scaffold51_16   | 559704          | 100         | 44                           | 44                                  |                |
| IES51PAK1-1036_mic           | gi 3894330                  | scaffold51_16   | 560250          | 100         | 46                           | 46                                  |                |
| IES51ICL1b_mic               | gi 1666902                  | scaffold51_134  | 33201           | 100         | 75                           | 75                                  |                |
| IES51G6447_mic               | gi 3452504                  | scaffold51_51   | 457658          | 100         | 28                           | 28                                  |                |
| IES51G4404_mic               | gi 3452504                  | scaffold51_51   | 455615          | 100         | 222                          | 222                                 |                |
| IES51G2832_mic               | gi 3452504                  | scaffold51_51   | 454043          | 100         | 229                          | 229                                 |                |
| IES51G1832_mic               | gi 3452504                  | scaffold51_51   | 453043          | 100         | 30                           | 30                                  |                |
| IES51G1413_mic               | gi 3452504                  | scaffold51_51   | 452624          | 100         | 52                           | 52                                  |                |
| IES51G-11_mic                | gi 3452504                  | scaffold51_51   | 451201          | 100         | 43                           | 43                                  |                |
| IES51B5464_mic               | gi 76589367                 | scaffold51_143  | 33517           | 100         | 28                           | 28                                  |                |
| IES51B1417_mic               | gi 76589367                 | scaffold51_143  | 37564           | 100         | 44                           | 44                                  |                |
| IES51B-9_mic                 | gi 76589367                 | scaffold51_143  | 38990           | 100         | 36                           | 36                                  |                |
| IES51A6649_mic               | gi 78707424                 | scaffold51_106  | 288995          | 100         | 370                          | 370                                 |                |
| IES51A6435_mic               | gi 78707424                 | scaffold51_106  | 288781          | 100         | 28                           | 28                                  |                |
| IES51A4578_mic               | gi 78707424                 | scaffold51_106  | 286924          | 100         | 883                          | 883                                 |                |
| IES51A4404_mic               | gi 78707424                 | scaffold51_106  | 286750          | 100         | 77                           | 77                                  |                |
| IES51A2591_mic               | gi 78707424                 | scaffold51_106  | 284913          | 100         | 370                          | 370                                 |                |
| IES51A1835_mic               | gi 78707424                 | scaffold51_106  | 284157          | 100         | 28                           | 28                                  |                |
| IES51A1416_mic               | gi 78707424                 | scaffold51_106  | 283738          | 100         | 74                           | 74                                  |                |
| IES51A-712_mic               | gi 78707424                 | scaffold51_106  | 281631          | 100         | 77                           | 77                                  |                |
| IES51A-4814_mic              | gi 29469820                 | scaffold51_106  | 277532          | 100         | 28                           | 28                                  |                |
| IES51A-10_mic                | gi 78707424                 | scaffold51_106  | 282313          | 100         | 29                           | 29                                  |                |
| epsilon51D_28bp_mic          | gi 1752672                  | scaffold51_128  | 10690           | 100         | 28                           | 28                                  |                |
| alpha51D_IES5_mic            | gi 1752672                  | scaffold51_159  | 213381          | 100         | 28                           | 28                                  |                |
| alpha51D_IES4_mic            | gi 1752672                  | scaffold51_159  | 209504          | 100         | 44                           | 44                                  |                |
| alpha51D_IES3_mic            | gi 1752672                  | scaffold51_159  | 207374          | 100         | 28                           | 28                                  |                |

|                            |                    |                      |               |            |            |            |                                            |
|----------------------------|--------------------|----------------------|---------------|------------|------------|------------|--------------------------------------------|
| alpha51D_IES1_mic          | gi 1752672         | scaffold51_159       | 205692        | 100        | 26         | 26         |                                            |
| 51ICL1d_IES3_mic           | gi 1667584         | scaffold51_124       | 172613        | 100        | 29         | 29         |                                            |
| 51ICL1d_IES2_mic           | gi 1667583         | scaffold51_124       | 173737        | 100        | 45         | 45         |                                            |
| 51ICL1d_IES1_mic           | gi 1667583         | scaffold51_124       | 173840        | 100        | 26         | 26         |                                            |
| <b>IES51pwB-658_mic</b>    | <b>gi 10716831</b> | <b>scaffold51_19</b> | <b>587496</b> | <b>100</b> | <b>155</b> | <b>146</b> | <b>alternative boundary form not found</b> |
| <b>IES51A6649_29bp_mic</b> | <b>gi 78707424</b> | <b>NA</b>            | <b>NA</b>     | <b>0</b>   | <b>29</b>  | <b>NA</b>  | <b>nested IES</b>                          |
| <b>IES51A2591_28bp_mic</b> | <b>gi 78707424</b> | <b>NA</b>            | <b>NA</b>     | <b>0</b>   | <b>28</b>  | <b>NA</b>  | <b>nested IES</b>                          |
| <b>IES51A15885_mic</b>     | <b>GB</b>          | <b>NA</b>            | <b>NA</b>     | <b>0</b>   | <b>54</b>  | <b>NA</b>  | <b>assembled in MAC reference</b>          |
| IES51pwB-383_mic           | GB                 | scaffold51_19        | 588978        | 100        | 47         | 49         |                                            |
| IES51PAK11-1036_mic        | gi 3916119         | scaffold51_5         | 724934        | 98.1       | 50         | 50         |                                            |
| IES51PAK1-538_mic          | gi 3894330         | scaffold51_16        | 560748        | 99.5       | 206        | 206        |                                            |
| IES51PAK1-294_mic          | gi 3894330         | scaffold51_16        | 561014        | 98.8       | 78         | 78         |                                            |
| IES51B3931_mic             | gi 76589367        | scaffold51_143       | 35050         | 99.5       | 416        | 416        |                                            |
| IES51A15637_mic            | GB                 | scaffold51_106       | 297971        | 98         | 47         | 47         |                                            |
| alpha51D_IES2_mic          | gi 1752672         | scaffold51_159       | 206601        | 96.8       | 29         | 28         |                                            |

**Table S3. Validation using previously characterized IESs.** Known *P. tetraurelia* strain 51 IESs were taken from GenBank. The IESs with no GenBank Accession Number had been communicated to M.B. and are designated "GB" to indicate that they are included in the compilation in [1]. Known IESs were compared with the genome-wide set of IESs by BLASTN. The four IESs that were not found are in bold. Sequencing errors in IESs deposited in GenBank, or SNPs between different 51 stocks, probably explain identity scores below 100%.

### Reference

1. Gratiás A, Bétermier M (2001) Developmentally programmed excision of internal DNA sequences in *Paramecium aurelia*. *Biochimie* 83: 1009–1022.
