# Supplementary material for: The Paramecium Germline Genome Provides a Niche for Intragenic Parasitic DNA: Evolutionary Dynamics of Internal Eliminated Sequences
Source: PubMed Central journal article supplement (PMC3464196; doi:10.1371/journal.pgen.1002984), 2012-10-04
Supplement: pgen.1002984.s011.pdf [file pgen.1002984.s011.pdf]

| IES (ParameciumDB Accession) | Size (nt) | Location of IES   | Gene ohnolog(s)  | Ohnologous IES | Element | Match %ID | Match Length (nt) |
|------------------------------|-----------|-------------------|------------------|----------------|---------|-----------|-------------------|
| IESPGM.PTET51.1.98.309432    | 2003      | intergenic        | -                | none           | A       | 72        | 883               |
| IESPGM.PTET51.1.128.254421   | 3392      | GSPATG00032293001 | none             | none           | A       | 76        | 2981              |
| IESPGM.PTET51.1.77.209216    | 4154      | intergenic        | -                | none           | A       | 75        | 3714              |
| IESPGM.PTET51.1.103.177611   | 2462      | GSPATG00028199001 | Recent WGD       | none           | B       | 87        | 2464              |
| IESPGM.PTET51.1.104.49056    | 2238      | GSPATG00028299001 | none             | none           | B       | 89        | 2228              |
| IESPGM.PTET51.1.105.239361   | 2483      | intergenic        | -                | none           | B       | 80        | 2166              |
| IESPGM.PTET51.1.120.182371   | 1769      | GSPATG00031026001 | Intermediate WGD | none           | B       | 80        | 1648              |
| IESPGM.PTET51.1.132.167159   | 1500      | intergenic        | -                | none           | B       | 86        | 1465              |
| IESPGM.PTET51.1.163.702      | 1956      | GSPATG00036746001 | none             | none           | B       | 74        | 1209              |
| IESPGM.PTET51.1.169.56908    | 3272      | GSPATG00037429001 | Recent WGD       | none           | B       | 87        | 3272              |
| IESPGM.PTET51.1.173.70900    | 2714      | intergenic        | -                | none           | B       | 67        | 1466              |
| IESPGM.PTET51.1.174.130670   | 3001      | GSPATG00037898001 | Recent WGD       | none           | B       | 75        | 2955              |
| IESPGM.PTET51.1.181.1750     | 3001      | GSPATG00038327001 | none             | none           | B       | 74        | 2411              |
| IESPGM.PTET51.1.214.11549    | 2317      | GSPATG00038730001 | none             | none           | B       | 81        | 2159              |
| IESPGM.PTET51.1.24.100577    | 1340      | GSPATG00009289001 | none             | none           | B       | 75        | 1265              |
| IESPGM.PTET51.1.28.457973    | 2468      | intergenic        | -                | none           | B       | 68        | 895               |
| IESPGM.PTET51.1.29.290535    | 1722      | GSPATG00010910001 | Recent WGD       | none           | B       | 78        | 1695              |
| IESPGM.PTET51.1.35.111752    | 2820      | GSPATG00012627001 | none             | none           | B       | 85        | 2692              |
| IESPGM.PTET51.1.42.397702    | 2473      | GSPATG00014783001 | Recent WGD       | none           | B       | 84        | 2263              |
| IESPGM.PTET51.1.42.72890     | 3389      | intergenic        | -                | none           | B       | 89        | 3389              |
| IESPGM.PTET51.1.47.408041    | 2125      | GSPATG00016182001 | Intermediate WGD | none           | B       | 79        | 2125              |
| IESPGM.PTET51.1.50.348282    | 1251      | intergenic        | -                | none           | B       | 81        | 1150              |
| IESPGM.PTET51.1.51.131273    | 2219      | GSPATG00017060001 | Recent WGD       | none           | B       | 76        | 1245              |
| IESPGM.PTET51.1.57.48117     | 1257      | GSPATG00018530001 | Recent WGD       | none           | B       | 82        | 1257              |
| IESPGM.PTET51.1.76.220822    | 3048      | GSPATG00022960001 | Recent WGD       | none           | B       | 84        | 2933              |
| IESPGM.PTET51.1.77.311405    | 3470      | intergenic        | -                | none           | B       | 85        | 1254              |
| IESPGM.PTET51.1.80.84925     | 1513      | GSPATG00023746001 | none             | none           | B       | 82        | 1515              |
| IESPGM.PTET51.1.85.45587     | 3479      | GSPATG00024746001 | none             | none           | B       | 78        | 2786              |

**Table S4. IESs used to identify the *Anchois* transposon family.** The BLASTN match of each IES with the final consensus of the A or B element, as indicated, is given in the last 2 columns of the table (cf. Text S1 for the alignments used to reconstitute the final *AnchoisA* and *AnchoisB* consensus sequences). Match length is the sum of non-overlapping HSPs. Match %ID is the weighted average percent identity of the HSPs.
