# Supplementary material for: The Paramecium Germline Genome Provides a Niche for Intragenic Parasitic DNA: Evolutionary Dynamics of Internal Eliminated Sequences
Source: PubMed Central journal article supplement (PMC3464196; doi:10.1371/journal.pgen.1002984), 2012-10-04
Supplement: pgen.1002984.s013.pdf [file pgen.1002984.s013.pdf]

## **Text S1. Transposon sequences.**

A) The sequences of *Sardine*, *Thon* and *Anchois* transposons reconstituted from manually adjusted multiple alignments of different decayed copies, cloned from the lambda phage library of MIC DNA (*Sardine*, *Thon*) or found in the PGM DNA assembly (*Anchois*). The sequences of the *Thon* transposon are those of the only known copy, so that ORF annotation (based on homology with the *Sardine* element) is preliminary; the *Thon* ORF1 sequence apparently contains a frameshift. Predicted introns have been removed from the ORF sequences.

B) Annotated comparison of *AnchoisA* and *AnchoisB*, showing the position and orientation of the ORFs, with a potential intron in the DDE transposase ORF.

C) Manually adjusted alignment used to reconstitute the *AnchoisA* element. Some PGM contig regions that correspond to imprecisely excised germline DNA have been included in this alignment.

D) Manually adjusted alignment used to reconstitute the *AnchoisB* element. Some PGM contig regions that correspond to imprecisely excised germline DNA have been included in this alignment.

E) IESs used to reconstitute *AnchoisA* and *AnchoisB* consensus sequences. The table provides the correspondence between the ParameciumDB IES accessions and the labels used in the alignments in C) and D). In a number of cases, “Alignment Length” is 2 nt longer than “IES Size”, since both flanking TA dinucleotides are included in the alignment. Some IESs used for the initial alignment and identification of *Anchois* (cf. Table S4) were not included in the final, manually adjusted alignments shown here.

**A** >Sardine consensus (6,673 nt with duplicated TAs)  
TATAGCTGTTTGCCTAAAAAATATATAATTGATTTTCATAATATAATAATTAATTTATAT  
TGAGTCAATATAATAAGCCTATTATATTGACTCAATATAAATGATTTATACTACAGAAAA  
TTTATATTATGGTgAAAAAGAAATTAATCTTTTTCCCAAATATTTAATTAATTAATACA  
TAAATTCAAAAATATTCTTCAATCTTTTTACAAAAATGCATTTGTGAAAAAGAAATGAT  
CTTTTTACAAATATAATTAATGAATGGTGAAGAAAGAACTATTCTTTTTACAGTTTAAAT  
TTTTATCATAATACAAATCAATTATATTGAGTCAATATAATAGGCTTATTATATTGACTC  
AATATAAAATTTAATTATTATATTGAAATCAATTATATATTTTTTAAGCAAACAGCTAT  
GTCTTTTTAAATATTAAGGATTtAATTAGTTTTAGTTAATTTCTATTGCAAAATTGTGTTT  
AACTATCTATCTCTACGAAACTTTTGCTAGTATATAAACCTTCATTAATTTATATTTTA  
TACAATGAGATCAATTTCAATTAATCTTTTCATTTGAATCATAGATTAGTCGATAACTTT  
TTATAGATAGATTATTCACCTTGGCTTTTGAAGCTCAAACCATTATATAATAAGTATAGA  
ATAATCTTAAATTATTAATGTAAATTTATATGATAATCTAACACAGTTTCTCAAACAAAT  
AACTAATTAATTCATTCAACAGATTATCCTCAAACATTCTATGATTCTATCATATAATA  
TTATTAATTTTATTACTTTCTCAACCGTTTCTTAATTTACTGATTTTACCTTATTTTTTA  
TCTTATTATATAAAATGTTATCTTTATTTCTATTTTATTTAAAATAGTTGAGGGCCTCGATTA  
ACAACCATAAAATTTTTTTGTAGTAAGACCATAAATTTGCAATTCATATTTTTTTTTTTG  
TATTAATTTATTTATTCAAATGAATTAACAATTTATTTTTAAAACCTTTAGTTTTTTAAA  
TATGTTCCAAACACCTACAATTAATGTTTGATATGTAATGAATTAGTTTTGCTTGTAAGAA  
ACAAATCAATAATTTGAAAAAAAATAAATGAACACCTCCTATCCTTTAATCATCTTAAA  
GCACAAAAAGAAATTCAGACCAAACCTGGATTCCTTTAGAAGTACATCTATAAATCAT  
GAGAGCGAAAGACAATCTTATCCACTATATGATCTTCAAATGCCAGAGAATTAATTA  
ATTGGTATGAAATCCATAAATGATGCGATTAGGTCTAAATCTTTACTTTTAGAATTGCA  
TATTAATAAATTTGATAATTTCTTTCTTAAAAAGCAATCAACATAAAAGGAATACGGGATTA  
TCTTAAAAAGGTTTTATCATATGCTTTTTTATCAATTAACAAATTAATTTTACAGATTA  
TTATAATAAAGTTTTCTTTAGAAATGAAGAGTATCGACATGATAGTATTTTACGCACTAAGAC  
TTTTAGCAAAATAAGCTGGTATTTATAATTAATAAATTAATAAGGCCATTAATATCACT  
TTAGGTTTTAAAATAATATTCAGATTGAAAAAAAATTAATTAAAAAAGAAATAAAAAAA  
AGCTCAATTTGAATGCTTTGTTGTATATAGTTTTTAGAATTATTATTAAAAAATCTGAA  
TTACAATTTGGCTTTTTCTTTTGCTTTTACTTTTTGAGTTGGATTTAGAAGTAAAGTTGTAT  
TTCAATCCTTACATTTTCCAGGATGTTTTATCAGATAAAATCGAAATAAACAAAGAGAAGTT  
TGATAAATTAAGAACAACAAACCGGTGCTTATTGGTAAATCATTATAATAGGCGGCAAAAT  
AACATTAAGTTTTTAGGACTACCTTTAAGTTTACCTATTTTTCTTTAATTAGAAATTA  
TAGAGATATACAAAGTCTATTAGAAAACTTAAAAAAGAATATAAGTTTTAAGTTGAAGC  
ATATAATGAGGAGACCAATAATTTATATAGAATTTTCATCTTTTACGTTATAAAATTTAT  
AAAGAAATCGATCTACCCTTCAAATAAATATAGTCAATTTTTGGAAAGCTAAGTAGCAAA  
TCATAAAAAATAGCAATAAATAATCTGATGCAGCTTTTCCAGCTCTATTTGAAATtTTCTT  
CGCGTATTTTGAATCCATAAAATAAATAAATAAATTTGGGAATTCAAAAGTTAATTCAT  
TATTAATAAATAATGTTTTTAAAAAGAGGAGTAAATCTGAATTATAAATTATAAGAAATAG  
AAACATAGAATAAATGAGAGAAGCAACTtAAATGTTGTACCTTTAGAGCAATCTGTTA  
AGATTAACAGTACCAAAATCATGTATATAAACTAATGAATAAATAGAATTCATTAATG  
GCAATTAAGTCTTTGAGAAAAAAtATAAAGTAGATAAATCCTAATAAAACTCATTAAAT  
AGGATCAATCTTTAATAATTTCTGATTGAAAACAAAGAATAAGAAATTTTATTAGAAG  
TAATAATATAAAACAATAATTTTTAAACaATAACTATGTAATAATTTATGTTCAATCCCC  
TTCGATATCCTTTATTTTTGTTTTCAATTAACCTTAAATCTTTTTTATAATCATCAATTAT  
TTTTAGCTTTCTGTCCATTTTACTTTCTAAAGTTTTCTTCTTCAAATTTTTCTTTTGT  
ATCTGCTTCCATTTATTTATCTTTTGATATACGAAAAATCTTTTAAACATTTGTTTTCTT  
ACCCATGAAAAATCTAACTCTTTAATCTTTCTAAAAATTAATTTTATAAATACTTGAT  
CTGATCTTGAGTGAAGATCTTCATATCATACTTTGAATCGGTTTTATATTTTTGAAAGAA  
AGAATGATTCGGTTTTAAAGTCTTTAAAACGTTTTATAATCCAATCTTTGTGAGGTTGGTG  
CTTTAATCTATTTCCCAAGTTTTTTTATTATATTGGTATTTTTTTGGACCTCCTCTATTAT  
TTCGTATTTTTTCACTGCCTTAAGTAGTACCCAATTTAAACTTCAGATAAATTAGGGAC  
ATAGATTTTCTCAAAAAGTACACCCAATAAATATTCTGATGTAATAATCGAAGATGTCAA  
TTTTGGTAAATATTTCCCTTAAATCAGCAATCCATAATAAGCTGATTTCCAAGGAAGGTAT  
TAAATTAATTAGCATCTGCTCGAGATATTTTGAATTCATTCTCTTCTTAAAATATATT  
TTACATTTTATTTTCACTTCAAAAAATAATTAATGAATAAACATTTCAATTAATATTT  
CCACTTAAATATGCATGGTAAATGTAAAAATTCAAAATCACGAAGACACTTCCTTATTTT  
TAACTAAAGATTATTTTTAATCGATTTCAAATAAATTTTTAATTTAATTTCTTTCTTGAT  
GTTTAGCAAAACAATAAGAACGCACCTCGAAATGCAAGTGTGCAAAAGACATTATAAAATA  
ATAAGTCTTAGTTTGAATCATATTTCCTAATCTCAGATAAATAAATCGATAAAGAAAGT  
TAAATGAAATACGAATGCTAGCCTATGCTTACTAGACATCCGATTTGCAATTATAGTTGC  
CTTGATTTCAAAAAATACATCTCAGGTTTCAAAAAATCGAAATTACTTTCCCTAAAGTC  
CTACCTTTACCATTGAAGAAGTGTAAACAATTAATTCATCAATCATCACACATAAAGAA  
GAGATAATTGAAAAAAAACCAAACCAAACCTAAAAGCTTGAGTATAAGAAGGAGA

TATTTTAAAAGTGTTTTTCTCTGACTTAGGATTAAGAGAAAAAATTGTAGAACTCCAA  
CTATTAATAATAGAAATCTGTCTCTGCTATCTATGCATTAGCCCCCTATAAGTT  
AGATAAAATACAATTAGATCAACAATTATTAATATAAAGAACAATTAAGATTACTAGA  
ACTTAGAGTGATTGGTTGATAGAATAAGCTTCATTTAATCAAATAGAAGTCTATTTAA  
GCTCGCTAATCTTATCCGAAATCATTGAATAATTTCCAAATTAAGAATATCTATTTAA  
TAATTTTCGTAATAATTTACACGGTTTTAAATATTAGGTATAGAATTCCTTCTCTCAAACCA  
TTACAATTTTTTAATAATATGGAAAACTGAAGAAATGAACAATTTTGTAGCTAAGTTA  
TGCGGATATGTATTTAAATAATATAAATTAATTTTTATTGATGAATGCTCTTTGGGAAAC  
ATTTCAAAGCTTCTCATAAATAATGGCATGTTGTTGGAACATTTAAAGAAATTACACAT  
AGAATTTCAAATTTTAAATATCTAATAGGATCATTGGGAGATGATTGCTTTTTATAATAT  
TAAATTTTTTTCAGGCACCTGGAAAGGGCTTTATATTTAGAGATTTTTTAGTTGAAGTAATT  
AAAAAGCTTAAGTTTTCTATTAGGAGAAACCCTTTGTTTTAATTTTAGATGGCTGCAGT  
ATTCATAAATCAAGTTTAGTGAATGATATATTTGAAGAAATTCCTCACATTTATACTCCA  
GCTTATAGACCAGAGTTTAAATGCAATCGAACATATGTTGGCTGGATTAAGAGAAAAATA  
GTTTCTTTGTAACCAAGTATAAATTCATAAATTCATTTATCAAATTCATTAACAATTAAT  
TAAATAGACGATAATTTAATGTAAAACCTGGTGTGGAAGTGTTTATAGACCAATACTTAAT  
GAATTATAATGGATTTGAACTTTTTAATTTATAATAAACTAAATTTTTGATTAATTT  
AAAATATATATGAATGAAAAGTCAAATTAAGACGGCTCTGCACAGTTTTGAGACTAACAA  
AATATTAATCTTCAAATTAAGGGATCTTTTAGACTAGTATGATTATTTTGCTATTTGC  
AAAGTTTGTAACCTCAGGTCTTGTTTACATTCGTAAATTAATTAGTAATCCATTACATA  
GAGTGTTCATCTTTTTCTAATTAATCCAAAGAAAAAGGATTGATTGTTGAGACAAATTA  
AATGACTATTTAAATCCAGAGTTTGATTACAATACTCCATTTTTTATTTAGGAAATCAAT  
CATACAAATTTCTTTAATCAATCTTAATGTTGGAATTTGTCAATCAGCAGCAAGACT  
TAGTATTAATCAGCATTTATGAAATTAATTAAGAATGTTGAATAGAAGGATTAACAA  
CTATGTGGATTGGATTTGATAAAAATTAATGCAGGATTAATGCACAAATTTAECTTAAGTG  
AATGCTGTTATTCGTTTATAAAAATACAATGCATATCCCATAATCTTTAGAATCAAGTAA  
AAAGTGAGATTATAAAAAAATTAATCAAAGAAAAAGTTGAAAAAGGCCCTCATCGTTCA  
TGGGATTTGAATTACATTTAAGAAGTAATATTAACCTTATACTTAGTTACTAAACGAATT  
GTTTGTTTACAATAGGGGATTTCTGGCCTTCAGACTCTTTATCCTATATGAGCTGGCTGC  
ACGAATTTCAGAATTAGCATAAATTAATTTTTAAATGGTGGTTAATGGATTTATAAACTA  
TATACCACAAAAATAAAAAAGACTTGGTAAAATTCAGAAAGAAAGTTCAAATAACAAC  
AAGCGTGCAATTATAAACACAAGAGTTTGTAAAAGAAATTCATTTGTTTGTATAAAC  
TTTAGATATTGGATTACATAAGCAATCTATTAATCATAATCTTTTCATAAATAATTGAA  
ATATGCTTTAAAATTAATAGAAAATAGAAAGGTTAATCTTTCAAATGAGTATAAAGAGTT  
CTTATAAAATTTTTAATATCATGATTTGAGATATTCAAAATTCGAAGAAATGAATAAAAG  
TGGAATTGACGAGAAAAATAATATAGACATTTGTGAAGCATTCCAATAGTAAACAACATA  
ATTGTATTTGTAAAATTAATAATAAATGAAATCGTTAATTTTTAATACGATAAACTAAAA  
TAAATGCAAAGAAAAATCTATGTATCACCAGTCTTATTTTAAATTTTTTAGGTGAAAA  
TGATTTTGAATGATATTATATATATGTTATAAGTGCATAATGAATAAAATTTAATGAATT  
AAAATGATTATACTAAAAATCACATTCATTCAAATAAGTTTACATTCAAATGAATTATA  
GGATGATAACTATTATGTTTTAAGCGATAATATATATATAATGTATTTAAAAATAGAA  
GAGAATTAAGACATAGCTGTTTGCTTAAAAAATATAAATGATTTTATAAATAATAA  
TTAAATTTATATTGAGTCAATATAAATAAGCCTATTATATTGACTCAATATAAATTGATTTG  
TATTATGATAAAAAATTAACCTGTGAAAAAGAATAGTTCTTTTTTACCATTCAATTAATTA  
TATTGTGAAAAAGATCATTCTTTTTTACAATGCATTTTTTGTAAAAAGAATTGAAGAATAA  
TTTTTTGAATTTATGTATTAATTAATTAATTAATTTGGTAAAAAGATTAATTTCTTTTTc  
ACCATAATATAAATTTCTGTAGTATAAATCATTATATTGAGTCAATATAATAGGCTTA  
TTATATTGACTCAATATAAATTTAATTTATATTATGAAATCAATTATATATTTTTTAA  
GCAAACAGCTATA

>Sardine consensus DDE cds

ATGCAAGTGCTGCAAAGACATTATAAAATAATAAGTCTTAGTTTGTAAATCATATTCCTAA  
TCTCTAGAATAATAAAATCGATAAGAAAGTTAAATTTGAATACGAATGCTAGCCTATGCTT  
ACTAGACATCCGATTTGCAATTATAGTTGCCTTGATTTCAAAAAATACATCTCAGGTTCA  
GAAAAATCGAAATTAATTTCCCTAAAGTCCACCTTTACCATTGAAGAAGTGTAACAA  
TTAATTCATCAATCATCACACATAAAGAAGAGATAATGAAAAAACCACAAACA  
AAACCTAAAAGCTTGAGTATAAGAAGGAGATATTTAAAAGTGTTTTTCTCTGACTTAG  
GATTAAGAGAAAAAATTTGTAGAACTCCAATTAATAATATAGAAATCTGTCTCTCT  
GCTATTTCTATGCATTAGCCCCCTATAAGTTAGATAAAAATACAATTAGATCAACAATTATT  
AAATATAAAGAACAATAAGATTACTTAGAACTTAGAGTATTGTTGATAGAATAAGCT  
TCATTTTCAAATCAAATAGAAGTCTATTTAACGCTCGCTAATTTCTTATCCGAATTCATTGAA  
TAATTTCCAAATTAAGAATATCTATTTAATAATTTTCGTAATAATTTACACGGTTTTAAAT  
ATTAGGTATAGAATTCCTTCTCTCAAACATTACAATTTTTTAAATAAATATGGAAAATCT  
GAAGAAATGAACAATTTTGTAGCTAAGTTATGCGGATATGATTTAAATAATATAAATTA  
ATTTTTATTGATGAATGCTCTTTGGGAAACATTTCAAAGCTTCTCATAAATAATGGCAT

GTTGTTGGAACATTTAAAGAAATTACACATAGAATTTCAAATTTTAAATATCTAATAGGA  
TCATTGGGAGATGATTGCTTTTTATAATATTAATTTTTTCAGGCACTGGAAAGGGCTTT  
ATATTTAGAGATTTTTTAGTTGAAGTAATTAAGGCTTAAGTTTTCTATTAGGAGAAA  
CCCTTTGTTTTAATTTTAGATGGCTGCAGTATTCATAAATCAAGTTTAGTGAATGATATA  
TTTGAAGAAATTCCTCACATTTATACCTCCAGCTTATAGACCAGAGTTAATGCAATCGAA  
CATATGTTTGGCTGGATTAAAGAGAAAAATAGTTTTCTTTGTAACCAAGTAAACTTCATAA  
TTCATTTATCAAATTCATTAAGCAATTAATTAATAGACGATAATTTAATGTAAAACCTGG  
TGTGGAAGTGTATAGACCAATACTTAATGAATTATAATGGATTTGA

>Sardine consensus DDE pep

MQVLQRHYKIIISLSLQSYSQSLEQQNRQESQIEYECQPMLTRHPICNYSCLDFKKYISGS  
EKIEITFPKVLPLPLKKCKQLIQSIITHKEEIEKKTCTKPKSLSIRRRYFKSVFPLTQ  
DQREKIVELQLLKYRNSVISAILCISPSQVRQNTIRSTI IKYKEQIKITRTQSDWLEQA  
SFQSNRSLFNARQFLSEFIEQFPNQRISIQQFRKILHGLNIRYRIPSLKPLQFFNKYGKS  
EEMNRFVAKLCGYVFKQYKLIFIDECSLGNI SKASHKQWHVVGTFKEITHRISNFKYLIG  
SLGDDCFLQYQIFSGTGKGFIFRDFLVEVIKKAQVFYQEKPFVLILDGCSIHKSSLVNDI  
FEEIPIHYTPAYRPEFNAIEHMFGWIKRKIVSLQPSITSQFIYQIHQTIHQIDNLMQNW  
CGSVYRPIILNELQWI

>Sardine consensus Y-recombinase cds

ATGAATGAAAAGTCAAATTAAGACGGCTCTGCACAGTTTGAGACTAACAACAATATTAAT  
TCTTCAAATTAAGGGATCTTTTAGACTAGTATGATTATTTTGCTATTTGCAAAGTTTGT  
AACTTCAGGTCTTGTTTACATTCGTAATTAATTAGTAATCCATTACATAGAGTGTTC  
TCTTTTCTAATTAATCCAAAGAAAAGGATTGATTGTTGAGACAAATTAATGACTAT  
TTAAATCCAGAGTTTGATTACAATACTCCATTTTATTTAGGAAATCAATCATACAAAT  
TTTCTTTAATCAATCTTAATGTTGAAATTTGTCAATCAGCAGCAAGACTTAGTATTA  
TCAGCATTATGAAATTACTcAAGAATGTTGAATAGAAGGATTAACAACAACATATGTGGA  
TTGGATTTGATAAAAATTAATGCAGGATTAATGCACAAATTTAACTTAAGTGAATGCTGTT  
ATTCGTTTATAAAAATACAATGCATATCCATAATCTTTAGAATTCAGTAAAAAGTGAGA  
TTATAAAAAAAATTAATCAAAGAAAAGTTGAAAAAGGCCTCATCGTTTCATGGGATTTG  
AATTACATTTAAGAATTACTAAACGAATGTTTGTTTACAATAGGGGATTTCTGGCCTTC  
AGACTCTTTATCCTATATGAGCTGGCTGCACGAATTTCAGAATTAGCATAAATTACTTTT  
TAAATGGTGGTTAATGGATTTATAAACTATATACCACAAAAATAAAAAAGACTTGGTAAA  
ATTGCAGAAAGAAAGTTTCAAATAACAACAAGCGTGCAATTATAAACACAAGAGTTTGTA  
AAAAGAAATTCAAATTTGTTTGTATAAACTTTAGATATTGGATTACATAAGCAATCTATT  
AAATCATAATCTTTTATAAATAATGAAATATGCTTTAAATTAATAGAAAATAGAAAG  
GTTAATCTTTCAAATGAGTATAAAGAGTTCTTATAAAAATTTTTAATATCATGATTTGAGA  
TATTCAAAATTGCAAGAAATGAATAAAAGTGGAATTGACGAGAAAATAATATAGACATTT  
GTGAAGCATTCCAATAGTAAACAACATAATTTGATTTGTAATAAATAAATAAATGAA  
ATCGTTAATTTTAATACGATAAACTAAAATAAATGCAAAGAAAATTTCTATGTATACCA  
AGTCTTATTTTAAATTTTTTAGGTGAAAATGATTTTGAATGA

>Sardine consensus Y-recombinase pep

MNEKSNQDGSALFETNNNINSKLRDLLDQYDYFAICKVCKLQVLFVFNQLVIIHYIECS  
SFSNQSKEKGLIVETNQNNDYLNPEFDYNTFFFIQEIHNHTNFLQSILNVGNLSISSKTQYQ  
SALLKLLKNVEQKDNKLCGLDLIKLMQDQCTNLTQVNAVIRLQNTMHI PQSLEFKQKVR  
LQKLIKKEKVEKRPHRSWDLNYIQELNELFVYNRGFLAFRLFILYELAARISELAQITF  
QMVVNGFINYIPQKQKRLGKIAERKFQITTSVQLQTQEFVKRNSICLLQTLDIGLHKQSI  
KSQS FHKQLKYALKLIENRKNVLSNEYKEFLQNFQYHDLRYSKLOEMNKSIGIDEKIIQTF  
VKHSNSKTTQLYLQNNINEIVNFNTINQNKCKEFYVSPSLILNFLGENDFE

>Sardine consensus ORF1 cds

ATGAATTAACAATTTATTTTTAAACTTTAGTTTTTTAAATATGTTCCAAACACCTAC  
AATTAATGTTTGATATGTAATGAATTAGTTTGCTTGTAAGAAACAATCAATAATTTGAA  
AAAAAATAAATGAACACCTCCTATCCTTTAATCATCTTAAAGCACAAAAGAAATTTCTA  
GACCAAACCTGGATTCCTTTAGAAGTAGACATCTATAAATCATGAGAGCGAAAGACAATCT  
TATCCACTATATGATCTTCAAATGCCAGAGAATTAATTAATTTGGTCTAAATCTTTAC  
TTTTAGAATTGCATATTAAACTTGATAATTTCTTTCTAAAAAGCAATCAACATAAAAG  
GAATACGGGATTATCTTAAAAAGGTTTATCATATGCTTTTTATCAATTAACAATTA  
ATTTAGATTAATTAATAAAAGTTTCTTTAGAATGAAGAGTATCGACATGATAGTATT  
TCAGCACTAAGACTTTTAGCAAAATAAGCTGGCCATTAATATCACTTTAGGTTAAAAAT  
AATATTCAGATTGAAAAAATAATTAATTAAAAAAGAATAAAAAAAGCTCAATTTGAA  
TTGCTTTGTTGTATATAGTTTTTTAGAATTTATTAATAAATACTGAATTTCAATTTGGCT  
TTTCTTTGCTTTACTTTTTAGTTGATTTAGAATAAGTTGATTTCAATCCTTTACA  
TTTTCAGGATGTTTTATCAGATAAAATCGAAATAAACAAAAGAGAAGTTTGATAAATTAAGA  
ACAAAACGGTGCTTATTGGTAAATCATTATAATAGCGCGCAAAAATAACATTAAGTT  
TTAGGACTACCTTTAAGTTCACCTATTTTTCTTTAATTAAGAAATATAGAGATATACAA  
AGTCTATTAGAAAACCTTAAAAAAGAATATAAGTTTTAACTTGAAGCATATAATGAGGAG

ACCAAATAATTTATATAGAATTTTCATCTTTCAGTTATAAAAATTTATAAAGAAATCGATC  
TACCCTTCAAATAAATATAGTCATTTTTGGAAAGCTAAGTAGCAAATCATAAAAATAGC  
AATAAATAATCTGATGCAGCTTTCCAGCTCTATTTGAAATtTTCTTCGCGTATTTTGAA  
TCCATAAAAATAAAAATAAATAATTGGGAATTCAAAAGTTAATTCAATTATTAATAATAAT  
GTTTTTAAAAAGAGGAGTAAATCTGAATTATAAATTATAAGAAATAGAAACATAGAATAA  
ATGAGAGAAGCAACTtAAATTGTTGTACCTTTAGAGCAATTCTGTTAAGATTAACAGTAC  
CAAAATCATGTATATAAACTAATTGAATAAATAGAATTCATTAATTGGCAATTAAGTCCT  
TGA

>Sardine consensus ORF1 pep

MNQNNLFLKLQFFKYVPNTYNQCLICNELVCLQETNQOFEKKINEHLLSFNHLKAQKEIL  
DQTGFLQNQTSINHESERQSYPLYDLQIARELNQIGLNLYFQNCILKLDNFLSKKQSTQK  
EYGIILKRFYHMLFINQTNQISDQIIKFLQNEEYRHSISALRLLAKQAGHQISLQVQN  
NIQIEKKNQLKKNKKAQFELLCCIQFLELLLKNLNYNLAFLLLLLFFELDLSECSISILT  
FQDVLSDKIEINKEKFDKLRKTVLIGKSLQQAAKITLKVGLPLSSPIFPLIRNYRDIQ  
SLLEKLEKKEYKQFLEAYNEETKQFIQNFHLSVIKFIKKSIIYPSKQIQSFLESQVANHKNS  
NKQSDAAFPALEIFFAVFESIKQKQIIGNSKVNSIINNNVFKKRSKSELQIIRNRNIEQ  
MREATQIVVPLEQFCQDQQYQNHVYKLIQIEFINWQLSP

>Sardine consensus ORF2 cds

ATGTAATAATATATTTAAGAAGAAGAGAATGAATTCAAAATATCTCGAGCAGATGCTAAT  
TAATTAATACCTTCCTTGGAAATCAGCTTATTATGGATTGCTGATTTAAGGGAAATATTTA  
CCAAAATTGACATCTTCGATTATTACATCAGAATATTTATTGGGTGTACTTTTTGAGAAA  
ATCTATGTCCCCTAATTTATCTGAAGTTTAAATTGGGGTACTACTTAAGGCAGTGAAAAAA  
TACGAAATAATAGAGGAGGTCCAAAAATACCAATATAATAAAAAACTTGGGGAATAGAT  
TAAAAGCACCAACCTGACAAAAGATTGGATTATAAACGTTTTTAAAGACTTTAAAACCGAAT  
CATTCCTTTCTTTCAAAAATATAAAAACCGATTCAAAGTATGATATGAAGATCTTCACTCAA  
GATCAGATCAAAAAGATTAAAGAGTTAGATTTTTCAATGGGTAAGAAAACAAATGTTAAA  
AGATTTTTTTCGTATATCAAAAAGATAAATAAATGGAAGCAGATAAAACAAAAGAAAATTTTG  
AAGAAGAAAACCTTTAGAAAAGTAAAATGGACAGAAAAGCTAAAAATAATTGATGATTATGAA  
AAAGAATTAAGTTAATTGAAAACAAAATAAAGGATATCGAAGGGGAATGA

>Sardine consensus ORF2 pep

MQNI FQEEENEFKISRANQLIPSLESAYYGLLIQGYLPKLTSSIIITSEYLLGVLFEK  
IYVFNLSEVQIGVLLKAVKKEYEIEEVQKIPIQQKTWIGIDQKHQPKDQWIINVLKTLKPN  
HSFFQKYKTDSDYDMKIFTDQDIKKIKELDFSMGKKTNVKRFRI SKDKQMEADKQKKIL  
KKKTLESKMDRKLKIIDDYEKELKLIENKIKDIEGE

>Thon (partial copy ; 5,262 nt with upstream TA)

TATAGCTGATTTTCATCAGCAAAATATACTTAATATTACTACAATATATATAAATTC AATT  
AAAATTTTGAATTAAGTTAATATATTGATAATGTATTAAGTCAATAAAAATTC AACTATT  
TTATTGACTTAATATAAAGTTTCTATTGGTGAAAAGATAAATATCTTTCCAGGTGAAAAG  
AAAATTTTTCTTTTCCAACTACTTTTTTACACAAAACCAAAGAACAATTTTTTGATTTGT  
AAATATAATAATATAAAAATTTATGGTGAAAAGAAAAAATTTCTTTTCCCAAATAATATG  
CTTTTATAGAAACCAAAAATAACACATAGAAATGTGTTAATACTATATTTCTTCTATATA  
TAATCAAAAATTaagatggttgatgattcctgaacttttagaaaaataaaacgaatta  
ttggtgaaaagaaatttttcttTtCaCATAATTTtTtATATTatcAtATATaCAAATCA  
AAAAATTTGtTCTTTGTTTTtGtGTA AAAAAGTATTGTGAAAAGAAAAATTTCTTTtTtCaC  
cGTGAAAGATATTTATCTTTTtCacCAATAGAAacCtTTATAtTAAGtTTGTGGAAGTGAT  
TTTTTTCTCTTAATTTATTTTTTTCTTATTTCCTATTATTGAATGAAAATTTATTGATTGAG  
AATCCATTTTCCATCATTTATTGAATTTTTCCAAGTTTCAAGAGTCCATTTTTAGTTTTTG  
CAAAATGGAAATGAATGTTGAAATTTATTTAATGGGAAAACCTCACGATATCCTTTAGCTT  
GTTTTATAATGATTTATCACCTATTCATCTAAATGATATTA AATTCAGTTCGATAATCAT  
CAAACAATGATGCATTTATTATGTCGTAAATTTTTTTGTAATAATCCGATCATTAAAGCA  
TTAATTTTAATAATGAATGATCAGAATATCAACAACA AATGTCAGTATTTTAAACAGAAT  
ACAGAGACAGAATATAAATGTTTTAATTTGCTTTTAAAACAATGATCATTTAATAAAGGCCA  
TCCATTGATTCATAATTTAATGATCATTTTTTTATCCAAAGCGCATATGATTAGTTAATTT  
TAAATTTTGCTTGAACCTGGGTATTTTGATCAAGTATCCTTTGCATGTGATTTGTAAATA  
AATTCGGGCAAAGAAATACAATTTAAGTTATAGTAAGCAAAG AATCTCAAAAATTA  
AGCAAAGAAATGAAGATTTTACATATTTAGATCTGAATTGCTATTTTCAAAAATGCACGA  
AACAAATTAATGGAATTGATCGAAAAATGTTGGCAAGTCAAAAAACATATCGCATAATA  
CTTAAACGCTTTTATAAATTTTTTATTGAAATGGAAGCGGATTCTTATGAAGAGGATTTG  
GTCTTACGATTTTTATAAAGAGAAAAAATTTAAACAGAATAGTATATCTGCTATGCAATTC  
CTTCAAAAAGCTATTTGTA AATGTCCTTAAAAC TATTTAGGCTAAGCCTTATCTGGTGAA  
TTCAATTGATAAAAATTA AAAACTAAAAGTAGATTAATAAACTTAAAATAGAGAAAAGGCC  
CAAGTTAAGTATAAATTTGTGTAATAACTTATGGCGTTTTCTATTCAACAATTCATAAGAA  
AGATTAGTCTTTCTGATATTTATATTGTTTTAATTTGAAATGATCTAAAAGTTATCCCG  
CAACTTAAGTATTAGGATATCTTGAATAATACTATTCAGAAGTCTACAAAATAATGGTTAA

AAGTCAAGTGAATAGATTTTAAAAATAAATAACTCGATATGTTAATTGATAATATAATTT  
TTGGAAAAATCTAACTCGATACGACTACTTTTGTGTTACCTGAGGTTTCGCAGGATAAGA  
GATTTGTAATCGCTTCTATGTTCAATTAACAGAAATTTGTTAAAAATAGAGAAGCACA  
ATGACACGCTTGAAGAATTTATCTAAAATTCACCTTTTCAAAGATAAAAATTTATAAAAA  
ACTATTAATTAGTGAGAAAAACAAGTAGACTGATAAGTAAAAGAATATATCTATTAATAA  
AGCGAACAGTTTATGGTAGTACCATTCCCCGATTTTATTAAAAAGTGTTTATATTTTGT  
GAAGAAGAAAAAAGTCAAGTCTAGACTTAAAATATTTTAAACTCAAACCTTAATAA  
AAAGCTAAGAGAAGCAAATCTTAGTTGGAATTATAACGATAAAAAAACAAGGTCCAAATG  
ATTTAAATTTCTAATCATATTATCGTTTTGGATGATAGCGATAATGAAAAATAATTCATG  
TATGTATTAGCTTTTATTCTTTTATAGTCCATCAACTCTTAAACATAAGGAACTTTTCAT  
TAGCCTAATTTACATTCAGAAAATGAAATTCATCAATTTCTCAAAGATAAAAATAATTTG  
TAAACGACTGATTAAGATTGAGCATAATTTAAGGAAGGAAATATTTATGAATTTAAAAA  
CTTTATTATCATTTGTTTCATGACCATAAAGGCTGTTTCAATTACCAGTAATATCCTTAAT  
CCTATCTTCGATAAAATTAATATCTTTTTTACATTCCTCAATAAGTTTGTGTTTGCATC  
CATCTTAACCTCTAAATTTTTTTTCTTCAAATTCCTTCAAATTTATCTGCTTCTTATTG  
TTTCTCTTTAAAAATCTGAAGAATCTTTTTCACACTTGTCTTTTTCCCATAAATCCAAT  
TCTTTTATTTTACTAAAATTTTTCAAATACTATTACTTGTATTATTCTAAGGCAAGCAAT  
TTCATATCAAAATTTGACTCTTATTTGTACTTTTTAAAAGAAAATATGATTTGGTTTAAAGT  
GTTTTTAAACACATTAATAATCCAGTCTTATCAGGAGTCTTTTTGGATTCAATTCCCCAA  
ATTTATTATTGAAGAGGAATCTTAATTAATTTCTGTATTAATTCATGCTTTGTTACAGAC  
TTTAGCAACACACCTATTTAGACTTCATCTAATTTGGTCGCATATATTTTATCAAATAAA  
ATGCCAATAAGTATTCGGACGTTATAATAGATGAAGTCATCTTTGGCAGATATTTTCCT  
TACATCAACAATCCAAAATATGCTGATCTTAGTGTATTAATTAATTTGGCGTCTTAC  
CTTGTTAATTTTATATTTCTTCTTAAAGAAATATTTTGCATAAATTTTGAATAAAT  
ATATATAAAAATCTTGATTTTTTTCAGCATTGTTTAAAGTGAATTAATTTGAAAATAAAAA  
ATGTAATAAATTTGTGATTGACGAAGCTGCTACGTATTTTTTATATAAAACATTATTTTAC  
CAAATTCAGAATTTATTTTATTTATGAATTTGGATATCAATAATCATGCAAAACAAT  
AAGATTCATTTCTAAGCATAAATTTACAAAATAAAGCTTTGAAATGTATATTATATT  
GAAATATTGGTAGCATAAAGAATAGAAGAAGAATCTACTATTGTGTATGAATGTTAACCC  
ATACTTGGGTTTCATCCTACTTGTAAATGAATAATGCTTAACTTTTTGTTCAAAAGATAGCA  
AATTAAGAAAAATGAACGATTTTAGAATTTGAAAAGCTCTAATTTCTCATCACTAATCTAG  
AGTAGGACTGTATTAATAAAGTTTGTGTTAAACAATATTAAGAAAAAGACATGAAACAA  
ACTAAATTTATGTTGAAAAGGAAAAATTAATTTGCAAGAAGAGAGCTACTCCATTAACA  
TTTGATAAGCGAAAGGATATCTAGGAATTTATAAATGAAACAATATAAAAATTCAGTAATA  
TCAGAGATCCTAGGAATTTAGCACATAAATAGTGAAGCAAAATCATATTAGACTTTAAATA  
AGTAAATCAAAAGTAGAAATCAAAATTTACAAAAGGTAGCAAAATTTGGTTGATAGAAAAT  
GGTTCATAAATAATCAAATTCGATATTTAATGCTCGATTTTTTCTAGCAGAATTTTAA  
ACTTAATTTCCAAAGCAACAAATTTACAATCTCTCAGTTTCGAAAGGTTCTACATTAGTGC  
AATTTAAAATATAGAATTCCTTCTTTGAAACCATTCAGTTTTTTTTATAAAGCTGGAAAA  
GATGAAGAAACAAAAATTTATATCTCAAATTTGTAGTTATCTCATAAATTCATATAAAAT  
TGTGTTTATTGATGAATGTTTCATTTAGGGAATATATCCAAATCTGCCATAAATAGTGGCA  
AGTTTTTAGGAACTTTCAAAGACTCTTAAAGGTTATCGAGTTTTTAAATACTTTATCGG  
AGCATTAGGTGAGGATAAATTTTTCTAATATTAAGTGTCTTTCTGGGACTGGTAAAGCTTA  
CATATTTAGGACTTTTTTAATATCAGTTATTAACAAAGCTCAAAAACACTATAAAAATCA  
ACCGTTTGTCTTAATTTATGGATAATTTGTAGTATCCATAAATCAAAATAAATTTGTAGAAAT  
CTTTGATAAAAATTCCTTGTATTTTTTACACCTGCTTATAGGCCAGAATTTAATGCGATTGA  
GCATATGTTTGGATGGTTAAAGAGAGGTCTAGTTGTATCTTAGCCAACCTCCACAAACCA  
ATTTATATATTTAAATCCATAGAATTTATGAATTTCTATTACAGAGAATTTAATGTAATAATG  
GTGTTAGAGTATTTACAAACCATGCTTAAAGAATTTGGATTATTTATGAGTACATTTTAA  
AAAGAAATTTAATTTACAATTAACATTTTTTATTATGATTCAATAATTTAAATGCATT  
TATCAACCAAATAAGAACAAGTTTCAAGAAATCTTAATTTCTGAATTGATTTTCGACAATG  
TACTAAATTTTATAAGTACAATACTATTTGCAAAAAGTGAATCAAGAAATTCCTTTAA  
CAGAGATAAATCATTTGATCATTCAATTAATTTGATTGTCAATAGAATGCTCATTGATTT  
CCCAGATAAATTAATTAAGCGAATAAaTTCaCCCTGAACCaTTGAGAAATCGatGGGTC  
tTGAAAATTTGGCAAGCTACTCaGTGTCaAGAAAAAaaaaataaAAAGTAATTTAATAAC  
TTCTTGATATTTGGAAAGTTATCAAAAGAATGTtAAAATCTCTAAAGACCTGCATTAATAA  
AGTTATTTAAAAATTTTCGATGATTGTAATCTTCTCAATTTGTAGGCTTAACAACTAAAA  
ATATTGTGAAATATTAATGTAAGTACAATTAAGTAATTAACAGTAAAAGAAAAATTT  
TAAAAGAAGGGATTCTCAAACGACCTCATCGATCATGGGATC

>Thon DDE cds

ATGAATTTGGATATCAATAATCATGCAAAaCAATAAGATTCAATtTCTAAGCATAAATtT  
ACAAAATAATAAGCTtTGAAATCATAAAGAATAGAAGAAGAATCTACTATTGTGTATGAA  
TGTTAACCCATACTTGGGTTTCATCCTACTTGTAAATGAATAATGCTTAACTTTTGTCAA  
AAGATAGCAAATTAAGAAAAATGAACGATTTTAGAATGAAAAGCTCTAATTTCTCATCA

CTAATCTAGAGTAGGACTGTATTAAAAAGTTTGTGTTAAACAATATTAAGAAAAAGAC  
ATGAAACAACTAAATTATTGTTGAAAAGGAAAAATTAATTTGCAAGAAGAGAGCTACT  
CCATTAACATTTGATAAGCGAAAGGATATCTAGGAATTATAAATGAAACAATATAAAAAAT  
TCAGTAATATCAGAGATCCTAGGAATTAGCACATAATAAGTGAGACAAAATCATATTAGA  
CTTTAAATAAGTAAATCAAAGTAGAAATCAAATTAACAAAAGGTAGCAAAATTTGGTTG  
ATAGAAAAATGGTTTCATAAATCAAATTCGATATTATTTAATGCTCGATcTTTTCTAGCA  
GAATTTTAAACTTAATTTCCAAAGCAACAAATTACAATCTCTCAGTTTTCGAAAGTTCTA  
CATTAGTGCAATTTAAAAATATAGAATTCCTTCTTTGAAACCATTTCAGTTTTTTTTATAAA  
GCTGGAAAAGATGAAGAAACAAAaTTTATATCTCAAATTTGTAGTTATCTCATAAATTCA  
TATAAAATTTGTGTTTATTGATGAATGTTTATTAGGGAATATATCCAAATCTGCCATAAA  
TAGTGGCATGTTTTAGGAACCTTCAAAGAGTCTACTTAAAGGTTATCGAGTTTTAAATAC  
TTTATCGGAGCATTAGGTGAGGATAACTTTTTCTAATATTAAGTGTCTTCTGGGACTGGT  
AAAGCTTACATATTTTCCAGGACTTTTTAATATCAGTTATTAACAAAGCTCAAAAACACTAT  
AAAAATCAACCGTTTGTCTTAATTTATGGATAAATTGTAGTATCCATAAATCAAAATAAATT  
GTAGAAATCTTTGATAAAATTCCTTGTATTTTTTACACCTGCTTATAGGCCAGAATTTAAT  
GCGATTGAGCATATGTTTGGATGGTTAAAGAGAGGTCTAGTTGTATCTTAGCCAACCTTCC  
ACAAACCAATTTATATATTTAAATCCATAGAATTATGAATTCATTACAGAGAATTTAATG  
TAAAATTTGGTGTTAGAGTATTTACAAACCATTGCTTAAAGAATTGGATTATTTATGA

>Thon DDE pep

MNLDINNHAKQQDSISKHKFTKQQALKSQRIEEESTIVYECQPILGFHPTCNEQCLTFVQ  
KIANQEKMNDFRIEKLQFSSLIQSRVTLKFFVVKQYQEKDMKQTKLLLKRKNQICKKRAT  
PLTFDKRKDIQELQMKQYKNSVISEILGISTQQVRQNHRLQISKSKVEIKITKRQONWL  
IENGSOQNSNILFNARSFLAEFQTQFPKQQITISQFRKVLHQCNLKYRIPSLKPFSSFFYK  
AGKDEETKFIQSICYSYLNSYKIVFIDECSLGNIKSAHKQWHVLTGTFKESTQRLSSFKY  
FIGALGEDNFQYQLFSGTGKAYIFQDFLISVINKAQKHYNQPFVLI MDNCSIHKSKQI  
VEIFDKI PCI FTTPAYRPEFNAIEHMFGLKRGLVVSQPTSTNQFIYQIHRIMNSITENLM  
QNWCSQSIYKPLLKELDYL

>Thon Y-recombinase cds (partial)

ATGCATTTATCAACCAATAAGAACAAGTTTCAAGAAATCTTAATTCTGAATTGATTTTC  
GACAATGTACTAAATTCCTTATAAGTACAATACTATTTGCAAAAAGTGAATCAAGAAAT  
CCTTTAACAGAGATAAATCATTTGATCATTCATTAATTTGATTGTCAATAGAATGCTCAT  
TGTATTTCCCAAGATAAATAAATAAGCGAATAaTTCaCCCTGAACCATTGAGAAATCG  
atGGGTCTTGAAAATTTGGCAAGCTACTCAgTGTCaAGAAAAAaaaaaataaAAAGTAATT  
TAATAACTTCTTGATATTGGAAAGTTATCAAAGAATGtAAAATCTCTAAAGACCTGCA  
TTAATAAAGTTATTTAAAAATTTTCGATGATTGTAATCTTCTCAATTTGTAGGCTTAACAA  
CTAAAAAATATTGTGAAATATTAATGTAAAAGTACAAATTAAGTAATTAACAGTAAAAG  
AAAATTTTAAAAGAAGGGATTCTCAAACGACCTCATCGATCATGGGATC

>Thon Y-recombinase pep (partial)

MHLSTKQEQVSRNLNSELIFDNVLNSYKYNTICKKCNQEIPLTEINHLLIHQIDCQQNAH  
CISQDNQISEIQP\*TI EKSMGLENWQATQCQEKKQKVIQQLLDIGKLSKECQNLQRPAL  
LIKLFKNFDDCNLNLQAQQLKNIVKYQCKSTNQVIKQKILKEGILKRPHRSD

>Thon ORF1 cds (putative -1 frameshift at position 973)

ATGAATGATCAGAAATATCAACAACAAATGTCAGTATTTTAAACAGAATACAGAGACAGAA  
TATAAATGTTTAAATTTGCTTTAAAACAATGATCATTTAATAAAGGCCATCCATTGATTCA  
TAATTTAATGATCATTTTTTTATCCAAAGCGCATATGATTAGTTAATTTTTAAATTTTGTCT  
GAACTTGGGTATTTTGATCAAGTATCCTTTGCATGTGATTTGTAAATAAATTCGGGCAAA  
GAAATACAATTTAAGTTATAGTAAGCAAAGAATCTCAAAAATTAAGCAAAGAATGT  
AAGATTTTACATATTTAGATCTaAATTGCTATTTTCAAAAATGCACGAAACAAATTAATG  
GAATTGATCGAAAAATGTTGGCAAGTCAAAAAACATATCGCATAATACTTAAACGCTTT  
TATAATTTTTTATTTGAATTGGAAGCGGATTCTTATGAAGAGGATTTGGTCTTACGATTT  
TTATAAAGAGAAAAATTTAAACAGAATAGTATATCTGCTATGCAATTCCTTTCAAAGCT  
ATTTGCTAAGCCTTATCTGGTGAATTCATTGATAAAAAATTAAAAACATAAAAGTAGATTAA  
TAAACTTAAAATAGAGAAAAGGCCAAGTTAAGTATAAATTTGTGTAATAACTTATGGCG  
TTTCTATTCACAATTCATAAGAAAGATTAGTCTTTCTGATATTTATATTGTTTTAATTT  
GAAATGATCTAAAAGTTATCCCGCAACTTAAGTATTAGGATATCTTGAATAATACTATT  
CAGAAGTCTACAAATAATGGTTAAAAGTCAAGTGAATAGATTTTGAAAATAAATAACTCG  
ATATGTTAATTGATAATATAAATTTTTGGAAAAATCTAAACTCGATACGACTACTTTTGTG  
TTACCTGAGGTTTCGAGGATAAGAGATTTGTAATCGCTTCTATGTTCAATTAACAGAA  
TTTGTTTTAAAAATAGAGAAGCACAAATGACACGCTTGAAGAATTTATCTAAAACCTCACCT  
TTTCAAAGATAAAAATTTATAAAAAACTTATTAATTTAGTGAGAAAAACAAGTAGACTGATAA  
GTAAAAGAATATATCTATTTAATAAAGCAACAGTTTATGGTAGTACCATTCCCGGATTTA  
TAAAACCTGTTTATATTTTTGTTTTGA

>Thon ORF1 pep (putative -1 frameshift corrected)

MNDQNINNKCYFKQNTETEYKCLICFKTMI IQQRPSIDSQFNDHFLSKAHMISQFQILL

ELGYFDQVSFACDLQINSKGEIQLFKLQQAKNLKNQSKECKILHIQIQIAIFKNARNKLM  
ELIEKCWQVKTYRIILKRFYNFLFELEADSYEEDLVLRFLOREKFKQNSISAMQFLSKA  
ICQALSGEFIDKNQKLVDDQQTQNRKAQVKYKLCQQLMAFLFNNSQERLVFLIFILFQF  
EIDLKVIPLKYQDILNNTIQKSTNNGQKSSEQILKINNSICQLIIQFLEKSKLDTTTTFV  
LPEVRRIRDLSLLCSIKTEFVQKIEKHNDTLEEFIQNFTFSKIKFIKNYQLVRKTSRLI  
SKRIYLLIKRITVYGSTIPRFIKTVYIFV

>Thon ORF2 cds

ATGCAAAATATTCCTTTAGGAAGAGGAATATATGAAATTAACAAGGTAAGACGCCAATTAA  
TTAATACCATCACTAGAAATCAGCATATTTTGGATTGTTGATGTAAGGAAAATATCTGCCA  
AAGATGACTTCATCTATTATAACGTCGGAATACCTATTAGGCATTTTATTTGATAAAAATA  
TATGCGcCCAAATTAGATGAAGTCTAAATAGGTGTGTTGCTAAAGTCTGTAACAAAGCAT  
GAATTAATACAAGAATTAATTAAGATTCCTCTTCAATAATAAATTTGGGGAATTGAATCC  
AAAAGAACTCCTGATAAGAAGCTGGATTATTAATGTGTTAAAAACACTTAAACCAAATCAT  
ATTTTCTTTTAAAAGTACAAATAAGAGTCAAATTTTGATATGAAATTGCTTGCTTAGAA  
TAATACAATAAAAATAAAGAATTGGATTTtATGGGGAAAAAGACAAGTGTGAAAAGATTC  
TTCAGAAATTTTAAAGAGAAACAATAAGAAGCAGAATAATTTAGAAAGAATTTGAAGAAA  
AAAAaTTTAGAGGTTAAGATGGATCGCAAACACAAACTTATTGAGGAATGTGAAaAAGAT  
ATTTAATTTTATCGaAGATAGgATTaAGgATATTACTGGTAATTGA

>Thon ORF2 pep

MQNILQEEYMKLTRQDANQLIPSLESAYFLLMQGKYLPKMTSSIIITSEYLLGILFDKI  
YAPKLEVDQIGVLLKSVTKHELIIQELIKIPLQQQIWIWIESKRTPDKNWIINVLKTLKPNH  
IFFQYKQESNFMKLLALEQYNKIKELDFMGKTSVKRFFRIKFKEKQQAEEQFRKNLKK  
KNLEVKMDRKHKLIEECEKDIQFIEDRIKDITGN

>AnchoisA consensus (3,599 nt with duplicated TAs)

TATAGTCCAAAATTATGTCAGATTTAAGTTGCTTTGAGTTGCAAAAATTAACCTTTTTTTT  
GCTGAAGCAGAAAAGAAACAAGAAATAAATTGATATATTATGAATAAGAATTTTTAATATT  
TTTTTCCCAATGTTGATTCTCTCCCTAAATTTGCATTAATATATTTTCTGCTGTTAATTT  
GCTGTTATAATAGTTTATAAATATTCAGATAAAAATAAAAAAATAAATTAGTGCAATTTA  
ATTGCAGAAAATATTTTCCAAGAGAATTTAAATTAGATAAAAATCTGCCTGGCTATTTTTT  
GTTTTTCAATATTTATCATCAAATAAATGTCTGAAAAGTTTCCAGCTAATCTATAACTT  
GCAAACATTTGCTCAACTTCATTATTTGGACAATCGAATATCAAGCTTCATCAATTTGTTT  
GCGTTGAACAAATTTAGAAAAATATGGAAGAAGCTTTAAATATTTGGAGGAGGGAAAAATC  
AACGAAGAAGAAACAAAAAATGCATTGAAAGAATTTTACAGCAGGGTTTGGAAAACCTCC  
AATAGCACTAAATCAAAGAAATCAACAAAGTGCACAAAGAAATTCGAAATTAGATATCA  
AAATTAGCGACCAAAATTTTAAAGCAACAGCAAATAAATATTTTAGAGAAAAAGGAATAGC  
AAGAAAGCAATTAGAAAGATAAACAATATGAAGAAATATTGTGAGAGGCAAGCAAGAAT  
TTGAGCAGAACATTTATTTAAGAAAAGTGAAGAGAGTGGTAGAGAAGTGGAAAGTGCTAAA  
GATGTATAAAAAGAGTTCATGAGGGAGCAGGATGGGTATCGGCCTTTGAGTTCCATCATA  
AGGATTTGAATGAAGAAGAGAAAAAGTTCTTTGACTCGAGAAAAGAAGAAAAAAGGTGCTG  
AAGCAGAATAGTAGCAGGATGAAAAATGAGATACCATAAAAATATATTAATAAATGCATGA  
ATAATTTTCTACTCTTTTTCATAATAAATCAATTTCTTCTTTAGAAATGCTGTCTCTATT  
CTACTCTCTTAAATTCCTTAATTCCTTAATTTCTTAATTTCTTCAAGTTAACTTTGATAATT  
TTAGCAACTTTTTTGTCTAAATGAGTTCTTTGCGAGCTAACTTTTTCTTAGCTGCATTTT  
ATTTAAATATCTCAACTTACTCTTTGTTCTGCGAAAATATCTCAGCCTTTTTATTTCTTC  
CGATAGAAGTGTCTAATTAGCGAATCAACCTTATGTTGATAAATATTTTACATTAATCA  
TCTGCGTGAGATTTGATTAATCCTGCCTTTAGGgtTTTTAAATAAAGAATGATTTGGTT  
CTATTGTTTTAAGAACATTAAGCTTCTTTTTAATTTTCAATGTAATAATTTCTTCTTTAGTAGCTG  
CAAGCTCTTAACCATTAAGCTTCTTTTTAATTTTCAATGTAATAATTTCTTCTTTAGTAGCTG  
ATCTCAGCAGTTATCTTATTTGAACCTTTTTTTGATTCTAAGCCAAAGCATTATTTAGTAG  
CAACTTTGAGCAAATATTACGCTGTTACACCTGAAGAATGAATTGCAGGTAATAAATATC  
CTGCCAAGATTAAGCCATAGTACATAGATTCAACAGAACCAGTTGCTTGATTAGCTTAGA  
AAATGGAAATCATGATGAATTTGAAAGTTTGTTTAATTATTCAAACAATGCGATAGTAA  
ATTTTTATTGAAAAAAAATTTCTTTTTTAACCAATCAATTTCAAAGCAATTGATTTTAAA  
AGCAGAAAACAATTTAGAATAAATTAAGAAAAATATTAATGATTTATAATTTTAAATGC  
AACTTAAATACTGCTTTTTTTATTTGAATTATATTTATAATGAGGATTTTTTTGTTTTGAATT  
GGAGAAAATATTTGATTTCAATTTTGAATTTGATTTGATTTGAAATTTAGATTATAGCTCCAAT  
TTTTATGCAAGAAATTTAATTTTCCACATTTAATGTAAATAGAAACTCAAGCTTCTTCA  
TCTCTGTACATATATTTGCTATAGCAGGCCATATGCTTAAACAACAATATGTAGACA  
CATATGCGATGATCATGCTAATAAATTTTACTAAACCTATGTTTATGAAAAAAGACTTTT  
AATCAAACCAAATAGCAAATGCTGGAACCTGCTTACTCTAGAGGATGCTCATAAAAATTA  
AAAACAAAAATTAGAATCCACAAGGGAAGTAAAGTTGAGAAAAAATATAAACAAATTTGA  
GAAAAAAGCAACTTCAAATCATTAACCTTTAAATTTGAGAAAATTTGCTTTAGAATTAGG  
AAATTCGGTAAAACCTGCAATTTTGGCAGGATATTTAGGAATTTCTATTGGAAGAGCTAA  
ATATTTATAAAAAGTATGTTtTACAGCAACCTGATTTACAAAGACAATAACTTGCTTTTTAA



ATTTGATGCATAACATAAAATTTTGGATTTAAAAATTTGTAGCTCAAGAAAATGTTGCTCG  
CTTGAGCAGTGCAAAATAAATCTATTAAGAATTTATAGCAAATTTTCATATTTGCAAATA  
GCAACTGCAGTTTTTATTAATTTTTTAAAGTAGTTTAAACAGCTTTGGTTATATACCTATCG  
CTATTTTAGTTGCGTTAATTTTTAAATCTCAAACATAAATGTTCTTTAGACAGAAGGTTTGA  
ATTTGCaAAATAAATAGCTACTCTTTTAAATTCAAAATAAAAAATTTGTTTACATTGATGA  
GTGCAGTTTTGGGAGAAAATTTAAAAGTTGCAAGAGGTTGGTAAAAAAGAACAACACTTTTTCC  
ATTAATGCAAATTAATCAAGCTCATCAAAAAATAAATGTGTTATTGGAGCTATAGCTTG  
TGACGGGTTTTATTGCTTACAAATGTGTTATAGGAAATGTTAATCAATAGGTTTTTGGAGA  
ATTTTTGAATGAACCTCTAAGGCTGCTTTAGCAGAATAGTGAAGAAAATAATTTTTGCTT  
GGTGTGGACAATGCATCTATCCATCGCACATCACAATTTTTGGATTAATTGTCTTATGT  
GAACATTTTATTTCTCCCACCATATAGTCCTTAGCTTAATTGCATTGAAAAGCTATGGGG  
AGTAGCAAAACAAAAGCTCTCCAAAATGCACCTCGCAACAACATTTTAAAGAATTTACAAA  
CATTCAATTTTGTGCTTAACCTCAATTACAGCTAATTAAGTGCAAAATATTTGCACCTTTAA  
CTTGAAATTTCTGCAAGCTTGCTTACATAGACAGCAGTTTTGATTAATTATATTTTCATT  
TAAACCATAAAAATATTCAATGCAAGCAATTAACAATAAAAAATTTCTCTACTCTTTTCTTAT  
AGCGACAGTGTGCAAAAGCAGACTTTTCGTGAGTTATACTTAACACTATCGAGCAGATATT  
AATAAGAGCAGAGTTTCGAATCGGGGGACAGGATGGGATCTAAAACACTCGCTCCTAAC  
CTTCCAGCCTATTCTCAATACTATTAGACTCTGATTTAATTATATATTTTTAAAATTTGA  
TAAAATTAATTTATGGGTTTTGGGGTAATTCATTAATATTTATATAATTTATATAATTTA  
TATTATTATAAAATTTATATAATCTGCAAAAGCAGAAAGTCAAATTTGATTTTACTATA

>AnchoisA consensus DDE cds  
ATGTAATAGAACTCAAGCTTCTCATCTCTCAGGCCATATGCTTAAACAACAATATGT  
AGACACATATGCGATGATCATGCTAATAATTTTACTAAACCTATGTTTATGAAAAAGA  
CTTTTAAATCAAACCAAATAGCAAATGCTGGAAGTACTCTAGAGGATGCTCATAAAA  
ATTATAAAAACAAAATTTAGAATCCACAAGGGAAGTAAAGTTGAGAAAAATATAAACAAA  
TTTGAGAAAAAAGCAACTTCAAATCATTAACTTTTAAAATTCAGAAAAATGCTTTAGAA  
TTAGGAAATTCGGTAAAACCTGCAATTTTGGCAGGATATTTAGGAATTTCTATTGGAAGA  
GCTAAATATTTATAAAAAGTATGTTTACAGCAACCTGATTTACAAAGACAATAAAGTTGCT  
TTTAAATTTGATGCATAACATAAAATTTTGGATTTAAAAATTTGTAGCTCAAGAAAATGTT  
GCTCGCTTGAGCAGTGCAAAATAAATCTATTAAGAATTTATAGCAAATTTTCATATTTGC  
AAATAGCAACTGCAGTTTCATTAATTTTTTAAAGTAGTTTAAACAGCTTTGGTTATATACC  
TATCGCTTATTTAGTTGCGTTAATTTTTAAATCTCAAACATAAATGTTCTTTAGACAGAAGG  
TTTGAATTTGCaAAATAAATAGCTACTCTTTTTAAATTCAAAATAAAAAATTTGTTTACATT  
GATGAGTGCAGTTTTGGGAGAAAATTTAAAAGTTGCAAGAGGTTGGTAAAAAAGAACAACACT  
TTTCCATTATTGCAAATTAATCAAGCTCATCAAAAAATAAATGTGTTATTGGAGCTATA  
GCTTGTGACGGGTTTTATTGCTTACAAATGTGTTATAGGAAATGTTAATCAATAGGTTTTT  
GGAGAATTTTTGAATGAACCTCTAAGGCTGCTTTAGCAGAATAGTGAAGAAAATAATTTT  
TGCTTGGTGTGGACAATGCATCTATCCATCGCACATCACAATTTTTGGATTAATTGTCT  
TATGTGAACATTTTATTTCTCCCACCATATAGTCCTTAGCTTAATTGCATTGAAAAGCTA  
TGGGGAGTAGCAAAACAAAAGCTCTCCAAAATGCACCTCGCAACAACATTTTAAAGAATTT  
CACAACTTCAATTTGTGCTTAACCTCAATTACAGCTAATTAAGTGCAAAATATTTGCACC  
TTTAACTTGAAATTTGCAAGCTTGCTTACATAGACAGCAGTTTTTGA

>AnchoisA consensus DDE pep  
MQIETQASSSLRYPYAQTTCRHICDDHCQQFYQTYVYVEKRLLIKTKQQMLELLLTLEDAHK  
IKQKLESTREVKLRKNINKFEKKSFKSLTLKQKIALELGNVSKPAILAGYLGISIGR  
AKYLQKYVLQQPDLQRQQLAFKFDQHKFWIQKFVAQENVARLSSAKQIYQEFIANFHIC  
KQQLQFHQFFKQFKQLWLYTYRLFSCVNFKSQTKCSLDRRFEFAKQLATLLNSKQKIVYI  
DECSFGRNLKVARGWQKKNTPLLQIKSSSSKNKCVIGAIACDGFIAKCVIGNVNQQVF  
GEFLNELRLRLLQONSEENNFCVLVDNASIHRTSQILDQLSYVNYLFLPPYSPQLNCIEKL  
WGVAKQKLSKMHFATTFQEFHNIHFVLSITANQVQNICTFNLKFLQACLHRQQF

>AnchoisA consensus ORF1 cds  
ATGTCTGAAAAGGTTTTCCAGCTAATCTATAACTTGCAAACATTGCTCAACTTCATTATTT  
GGACAATCGAATATCAAGCTTCATCAATTTGTTTGCCTTGAACAAAATTTAGAAAAATATG  
GAAGAAGCTTTAAATATTGGAGGAGGGAAAAATCAACGAAGAAGAAACAAAAATGCATT  
GAAAGAAATTTACAGCAGGTTTGGAAAATTTCCAATAGCACTAAATCAAAAGAAATCAA  
CAAAGTGCACAAAGAAATTCGAAATTAGATATCAAAATTAGCGACCAAAATTTTAAAGCAA  
CAGCAAATAAATATTTTAGAGAAAAGGAATAGCAAGAAAGCAATTAGAAAAGATAAACAA  
TATGAAGAAATATTGTCAGAGAGCAAGCAAGAATTTGAGCAGAACATTTTAAAGAAA  
GTGAAGAGAGTGGTAGAGAAGTGAAGTGTAAAGATGTATAAAAAGAGTTTATGAGGGAG  
CAGGATGGGTATCGGCACCTTTGAGTTCCATCATAAGGATTTGAATGAAGAAGAGAAAAAG  
TTCTTTGACTCGAGAAAGAAGAAAAAGGTTGCTGAAGCAGAATAGTAGCAGGATGAAAAA  
TGA

>AnchoisA consensus ORF1 pep  
MSEKVSSQSITCKHCSTSLFGQSNIKHLHQFVCVEQIQKNMEEALNIGGGKNQRRRNKKCI

ERILQQGLENFQQHQIKRNQQSAQRNSKLDIKISDQNFKQQQINILEKKEQQESNQKDKQ  
YEEILSESKQEFEQNIILRKVKRVVEKWKQRCIKEFMREQDGYRHFHFHKKDLNEEEKK  
FFDSRKKKKGAEAEQQQDEK

>AnchoisA consensus ORF2 cds

ATGATTTCCATTTTCTAAGCTAATCAAGCAACTGGTTCTGTTGAATCTATGTACTATGGC  
TTAATCTTGGCAGGATATTATTTACCTGCAATTCATTCTTCAGGTGTAACAGCGTAATAT  
TTGCTCAAAGTTGCCTACTAAATAATGCTTTGGCTTAGAATCAAAAAAGTTCAAATAGGA  
TAACTGCTGAGATCAGCTACTAAAGAAGAAATTTTACATGAAATTAAGAAGCTTAAT  
GGTTAAGAGCTTGGCTTTTCTGATGGAACCTACCCTGATAAACATGGGCAGTTAATGTT  
CTTAAACAATAGAACCAAATCATTCTTTATTTAAAcCCTAAAGTGCAGGATTAATCAA  
ATCTCACGCAGGATGATTTAATGTAAATATTTATCAACATAAGGTTGATTTCGCTAATTA  
GACACTTCTATCGGAAGAAATAAAAGGCTGAGATATTTTCGCAGAACAAGGAGTAAGTT  
GAGATATTTAAATAAAATGCAGCTAAGAAAAAGTTAGCTCGCAAAGAACTCATTTAAGCA  
AAAAAGTTGCTAAAATTTATCAAAGTTAACTGAAGAATTAGAAATAGTGAATTAAGGAATT  
TAAGAGGAAGTAGAATAGAGACAGCAATTCATAAGAAGAAATTGA

>AnchoisA consensus ORF2 pep

MISIFQANQATGSVESMYGLILAGYYLPAIHSSGVTAQYLLKVATKQCFGLESKKVQIG  
QLLRSATKEEILHEIKKLNQELGFSQDGNYPDKTWAVNVLKTIEPNHSLFKTLKCRINQ  
ISRRMIQCKIFINIRLIRQLDTSIGRNKRLRYFRRTKEQVEIFKQNAAKKKLARKELIQA  
KKLLKLSKLTTEELEIVNQIQEEVEQRQQFQRRN

>AnchoisB consensus (3,621 nt with duplicated TAs)

TATAGTCGAAAACAATTTTCAGCCAACATTCACCTTTGAGTTGCAAAATTCATTTTTATTTT  
GCTATTGCAAAAGCCAAGTAAAAATGAACCAAGTTTATTTAAAAGCAGGTTTGAAGGAA  
ATTTTTGATAAATAATTTTTCTTATAAATTAATTTAACTTCTAATATTTTTTTTGTGCACTTTT  
ATATATATTGCTTATAAATAATATATTTTGCATTATATGATATATAAAGCAAAGTAACGCA  
ATTTTATCGCAGCAAATTTTTTTTTCAGGATATTTTTATTAATTTAAATTTATGTATGTCTATT  
TTTTGTTTTTTCATTGTTATTTTTCAAATGTCTGAAATATAACCCAAGTAGCCCATAACTTG  
CCAATATTGCCAGAAAGTATTGTTTGGGTAATTGAACATCAAGGCCCATCGTTTTATTTG  
TATTGAACAATTGAAGAAAAATTTGGAATTAGAATTATAGGTTGGCTAAGGAAAAAATCA  
ACGCAGGAGAACAAAAAGTTTATAGAAAAAGTATTGTAGCAAGTTTTCAGCAACTTCCA  
ATAAAATGAATCTAAAAGAAATTCAGATCATAAGCAAAGGACCTAACACTTAGATGAAAA  
AAATGCTAAAGACAATATTTAGCAATAGCAATTAATAATTTTCAGAAAAGTAGCAACAGCA  
GGAAATAAAATAAACAGAAAAATAGGCTGAAGAAATAGTAGCAGAAAAAATCAAGATGT  
AGAGCAGAAATATTTTGAAGAAAGTTAAGAGAATAGTTGAGAAATGGAAATGCTAGAA  
ATGCATTAAGAATTCATAAGGGAACAGGATGGATATCGACATTTTTCAGCACCATCATAA  
AGATTGTAACGAAGAGGAGAAAAAATTCCTTTGAGCAGAGAAGAAAGAAAAAAGTTGCAGA  
ATCATAGCAATAGCAAGAAGAAAAATGATATATATAAATAAATAAATTTAGAGAAATATTT  
GATCTTTTTGTTTTGTTTTATTAATAATTTCAATTTCTTCTTTAAAACGACTGCGCTT  
ATTAACCTTCTTCTTAAATTCCTTAATTTATTTATTTCTAACTCTTCAGTTAACTTTGATA  
ATTTAAGCAATTTTTTTGCTTAAATAAGCTCTTTGCGAGCCTGCTTTTTCTTTGCTGCAT  
CTTATTTAAATTTCTCAACTTGCTTCCTTCGTTCTGCGGAAATATCTCAACTTTTTTTGTTT  
TTCCAATAGATGTATCTAATTAACGAATCAAACCTTTAATTGAAATAACTGTTACATTTAGA  
TCATCTTGCGTAAGATTTGATTAATCTTGCACCTTtGGTTCTTGAATAAAGAATGATTG  
GATCTATCGTTTTAAGAATATTGACTGCCCATGTTTTATCAGGGTAGTTTTCCATCAGCAA  
AGCCAAGCTCTTAGCCATTTAGTTTTCTTTTAAATCTCGTGTAATAATTTCTCTTTAGTTG  
CTGATCTTAGCAATTATCCTATTTGAACTTTTTTTGATTCTAAGCTATAGCATTTTTTTTG  
TAGCAACTCTGAGCAAATATTACGCTGTTACACCTGAAGAATGGATCGCGGGCAAATAAT  
ATCCCGCTAAGATTAATCCATAATACATAGATTCAACAGAACCAGTTGCTTAATTTGCTT  
GTAATAATGGAAATCATAAAGAATTCATAATCTTTGTTCAATTAATTTAAAATGCAAAAG  
CAAAATTTATATTGAAAAAAAATTCCTTTTCCAACCAATCAAATTGAAAGCAATTTATCG  
CAATTAATAAATAAATAAAGAATAAAACAACAATAATTAATTTATTTTTTTAAA  
TATAAATTATAACTAGCATTCTTATTGGATTATTTTTAAATTCAGATTTTTTTTCAAAAA  
TTGACAAAATATTTTTCCATTCAATTTGTTATTATTGGATGTTGGTATGAATTTTAGAATA  
TGAAATCTTATTTATTGCAAATAATTCATTTATTTTATAATTTAATGTAAATAGAACTC  
CAGCTTCAACTTCTTCTCTGTAATAATATTTTGTATAGCAGGCCTTACACTTAACT  
ACATTTATGTAGACATACATGCAATGATGACTGTCAATAATTTTATTAACCTATGTGTAT  
GAAAAAATAAATAATTTTCATCAAAACAAAACAGCAATTCAGGAATTGATTACTTTGGAT  
GATGCGCTTAAATTTATATAGCAAAAATTTATAAACAAAAAGGGAAGAAACGCTAAGAAAA  
AAGATTAACAAACCTAAGAGACCAATATATTTAAATCTTAACTTAACTTAACTTTCAAGTTAAAG  
TAAATTGCTTAAAGAAATAGGAACTTCTATAAAAACCTGCAATTTTAGCAGGATTTTAGGA  
ATTTCAATTTGGAAGGGCTAAATATCTATAAAAAGTAAGTTTCAGAGATATCCCGATTCTCTG  
AGTCAATAATTTGCTTTTTTTCATTTGATGAATAGCACAAATTTATGGATTGAAAAATTTGTA  
GCTTAAGATAATGTTGCACACTTTCAGCAGTGCAAAACAAATATATTAAGAATTCATTGTA  
AATTTTCATATTAATCAATAACAACCTGCAATTTTCATTCAATTTTTTTTAGTGTTTAAAGCAA

CTTGGGTTGTATACTTATCGCTTACTTAGTTGCTTTAATTTTAAATCTCAAACCAAATGC  
TCTTTAGAAAGAAGATTTGAATTTGCAAATAATTAECTACTCTTCTAAGTTAAAATTA  
AAATTAGTCTACATTGATGAATGTAGCTTTGGGAGAACTTAAAAGCTGGACGATGCTGG  
CAAAAAAGAATAGTTATCCATTGCTGTAATAAAAATCGAACTCCTCAAAAAGTAAATGT  
GTAATTGGTGCATCTGTGTGTGATGGGTTTATTGCTTATAAATGTGTTATCGGAAATGTA  
AATCAATAGGTATTTGGAGAATTTTGAATGAACTTTTAAAGCTGCTTTAGCAAAATAAT  
GAAGAAAAATAATTTTGCCTTAGTGTGGATAATGCCTCCATCCACCGAACATAATAAAT  
CTGAATCAATTATCATTGTTAATTTATTTCTTCCATATAGCCCTTAGCTTAAC  
TGCATCGAAATGCTGTGGGGAATTGCTAAGCGATAGCTCTCTAAAATGCATATTGCAACT  
ACTGCCAAGAATTTTATAATATACATGTTGTGCTTAACTCTATTACAACAACCTCAAGTT  
CAAAACATCTGCACCTTCAAACCTAAAATTCCTAGAAGCTTGTGTTACGAAAATAATTC  
TGATGCTATTATATAACAATTTAAATTTTAATATAAAGTTTCAATAGTAAATGAGCAAAA  
GTCTCCGATTTCTTCGAATAGCGATGGTGTAGCAACTGCAGATTGTTAGTCTGGAATGCT  
TTAACACTTTCAAGCAGATTTTAGTTCGAAGCAGAGTTTTCGAATTGGGGACCGAAAGGGA  
GCTAAATCACTCGCTCCTTAATCTATCCAGCCAACCTCTCAATATAACAAGCCTTTTCAAT  
TTATTTATAGTTTTTTGATTATAAAAATAAAAATTTATGGGTTTGTGTGATTGATGAGT  
TATATATAAAAATAGATTTATATTATAAAAAGAAATAATATCAGGAAGTCTGAAGAAGTAG  
ATGAAATTGTATTGGACTATA

>AnchoisB consensus DDE cds

ATGTAATAGAACTCCAGCTTCAACTTCTCTCAGGCCTTACACTTAAACTACATTA  
TGTAACATACATGCAATGATGACTGTCAATAATTTTATTAACCTATGTGTATGAAAA  
AAAAAATTTTCATCAAAACAAAACAGCAATTGCAGGAATTGATTACTTTGGATGATGCG  
CTTAAAATTTATATAGCAAAAATTTATAAACAAAAGGGGAAGAAACGCTAAGAAAAAGATT  
AACAAACCTAAGAGAGCAAAATATATTTAAATCTTAACTTAACTTTCAAGTTAAAGTAAAT  
GCTTAAGAATTAGGAATCTCTATAAAAACCTGCAATTTTAGCAGGATATTTAGGAATTTCA  
ATTGGAAGGGCTAAAATATCTATAAAAAGTAAGTTTCGAGAGTATCCCGATTCTCTGAGTCAA  
TAATTTGCTTTTTTCAATTTGATGAATAGCACAAATTTATGGATTGAAAAATTTGTAGCTTAA  
GATAATGTTGCACACTTGAGCAGTGCAAAACAAATATATTAAGAATTCATTGTAAATTTT  
CATATTAATCAATAACAACGCAATTTTCAATTTTATTTTAGTGGTTTAAAGCAACTGGG  
TTGTATACTTATCGCTTACTTAGTTGCTTTAATTTTAAATCTCAAACCAAATGCTCTTTA  
GAAAGAAGATTTGAATTTGCAAATAATTAECTACTCTTCTAAGTTAAAATTTAAAATTA  
GTCTACATTGATGAATGTAGCTTTGGGAGAACTTAAAAGCTGGACGATGCTGGCAAAA  
AAGAATAGTTATCCATTGCTGTAATAAAAATCGAACTCCTCAAAAAGTAAATGTGTAATT  
GGTGTCTATCTGTTGTGATGGGTTTATTGCTTATAAATGTGTTATCGGAAATGTAAATCAA  
TAGGTATTTGGAGAATTTTGAATGAACTTTTAAAGCTGCTTTAGCAAAAATAATGAAGAA  
ATAAATTTTGCCTTAGTGTGGATAATGCCTCCATCCACCGAACATAATAAATTTCTGAAT  
CAATTATCATTGTTAATTTATTTCTTCCATATAGCCCTTAGCTTAACTGCATC  
GAAATGCTGTGGGGAATTGCTAAGCGATAGCTCTCTAAAATGCATATTGCAACTACTGCC  
TAAGAATTTTATAATATACATGTTGTGCTTAACTCTATTACAACAACCTCAAGTTCAAAA  
ATCTGCACCTCAAACCTAAAATTCCTAGAAGCTTGTGTTACGAAAATAATTTCTGA

>AnchoisB consensus DDE pep

MQIETPASTSSLRPHYTQTLRHTCNDDCQQFYQTYVYEKKKIFIKTKQQLQELITLDDA  
LKI IQQLQTKREETLRKKINKPKRANIFKSQLTFKFKQIAQELGTSIKPAILAGYLGIS  
IGRAKYLQKQVREYPDSLSQQFAFSFDEQHKLWIEKFVAQDNVAHLSSAKQIYQEFIVNF  
HINQQQLQFHSSFFQWFKQLGLYTYRLLSCFNFKSQTCKSLERRFEFAKQLTLLSQNQL  
VYIDECSFGRNLKAGRCWQKNSYPLLQIKSNSKSKCVIGAIICDGFIAKCVIGNVNQ  
QVFGEFLNELLKLLQONNEENNFLVLDNASIHRTQQILNQLSfVNYLFLPPYSPQLNCI  
EMLWGIKRQLSKMHIATTAQEFYNIHVVLNSITTTQVQNICTSNLKFLEACLLRKQF

>AnchoisB consensus ORF1 cds

ATGTCTGAAATATAACCAACTAGCCATAACTTGCCAATATTGCCAGAAAGTATTGTTT  
GGGTAATTGAACATCAAGGCCATCGTTTTATTTGTATTGAACAATTGAAGAAAAATTTG  
GAATTAGAATTATAGGTTGGCTAAGGAAAAATCAACGCAGGAGAACAAAAAAGTTTATA  
GAAAAAGTATTGTAGCAAGGTTTAGCAAACCTCCAATAAAATGAATCTAAAAGAAATTC  
GATCATAAGCAAAGGACCTAACACTTAGATGAAAAAATGCTAAAAGACAATATTTAGCAA  
TAGCAATTTAAAATTTTCAGAAAACCTAGCAACAGCAGGAAATAAAATAAACAGAAAAATAG  
GCTGAAGAAATAGTAGCAGAAAAAATCAAGATGTAGAGCAGAATATTTATTTGAAGAAA  
GTTAAGAGAATAGTTGAGAAATGGAATGCTAGAAATGCATTAAGAATTCATAAGGGAA  
CAGGATGGATATCGACATTTTGTAGCACCATCATAAAGATTGTAACGAAGAGGAGAAAAA  
TTCTTTGAGCAGAGAAGAAAGAAAAAAGTTGCAGAATCATAGCAATAGCAAGAAGAAAA  
TGA

>AnchoisB consensus ORF1 pep

MSEIQPNQPITCQYQKVLFGQLNIKAHRFICIEQLKKNLELELQVGQGNQRRRTKFKFI  
EKVLQQGLANFQQNESKRNSDHKQRTQHLDEKNAKDNIQQQQLKISENQQQQEIQQTEKQ  
AEEIIVAEKNQDVEQNIILKKVKRIVEKWKCKQCIKEFIREQDGYRHFHHHKDCNEEEKK

FFEQRRKKKVAESQQQQEEK

>AnchoisB consensus ORF2 cds

ATGATTTCCATTTTACAAGCAAATTAAGCAACTGGTTCTGTTGAATCTATGTATTATGGA  
TTAATCTTAGCGGGATATTATTTGCCCGCGATCCATTCTTCAGGTGTAACAGCGTAATAT  
TTGCTCAGAGTTGCTACAAAAAATGCTATAGCTTAGAATCAAAAAAGTTCAAATAGGA  
TAATTGCTAAGATCAGCAACTAAAGAGGAAATTTTACACGAGATTTAAAAGAACTAAAT  
GGCTAAGAGCTTGGCTTTGCTGATGGAAACTACCCTGATAAAACATGGGCAGTCAATATT  
CTAAAACGATAGATCCGAATCATTCTTTATTCAAGAACCcaAAGTGCAAGATTAATCAA  
ATCTTACGCAAGATGATCTAATGTAACAGTTATTTCAATTAAGTTTGATTTCGTTAATTA  
GATACATCTATTGGAAGAAACAAAAAGTTGAGATATTTCCGCAGAACGAAGGAGCAAGTT  
GAGAAATTTAAATAAGATGCAGCAAAGAAAAAGCAGGCTCGCAAAGAGCTTATTTAAGCA  
AAAAAATTGCTTAAATTATCAAAGTTAACTGAAGAGTTAGAATAAATAAATTAAGGAATT  
TAAGAAGAAGTTTAAATAAGCGCAGTCGTTTTAAAGAAGAAATTGA

>AnchoisB consensus ORF2 pep

MISILQANQATGSVESMYGLILAGYYLPANHSSGVTAQYLLRVATKKCYSLESKQVIG  
QLRSATKEEILHEIQKLNQELGFADGNYPDKTWAVNILKTIDPNHSLFKNPCKINQ  
ILRKMIQCNSYFNQSLIRQLDTSIGRNKKLRYFRRTKEQVEKFKQDAAKKKQARKELIQA  
KKLLKLSKLTEELEQINQIQEEVQQAQSFQRRN

**B** AnchoisA 1 TATAGTCCAAAAATTATTGCAGATTTAAGTGTCTTTGAGTTGCAAAAATTAACTTTTCTTTGCTGAAGCAGAAAGAAACAA  
AnchoisB 1 TATAGTCCAAAACAATTTCAGCCAACATTCACCTTTGAGTTGCAAAAATCAATTTTATTTTGTCTATTGCCAAAGCCAAGTA

AnchoisA 81 GAAAT-----AAATTGATATA-----TTATGAAATAAGAAATTTTTAATAT--TTTTTCCCAATGTGATTCTCTCCC  
AnchoisB 81 AAAATGAACCAAGTTTATTATAAAGCAGGTTGAAGGA-AATTTTTGATAATAATTTTCTTATAAATTAATT-----

AnchoisA 146 TAAATTTGCATTAATATATTTCTGTCTGTTAATTTGCTGTTATA---ATAGTTTATAA---ATATTAG---ATAAAA  
AnchoisB 153 TAACTT---CTAATATTTTTGTGC-----ACTTTTATATATATGTCTTATAATAATATATTTCGATTATATGA

AnchoisA 215 TAAAAAAATAAATTAAGTGAATTTAATTCGAGAAAATATTTTCCAAGAGAAATTTA--AATTAGATAAAATCTGCCTGGC  
AnchoisB 220 TATATAAGCAAAAGTAAACGCAATTTTATCGCAGCAAAATTTTTTTCAGGATATTTTATTAATT---TAAATTAATGTATGTCT

AnchoisA 293 TATTTTTCGTTTTTCAATATTATCATCAAAATAAATGCTCTGAAAAGGTTTCCAGCTAATCTATAACTTGCAAACATTGCT  
AnchoisB 297 TATTTTTTG-TTTTCATTTGTTATTTCA----AAATGCTCTGAAAATATAACCCAACTAGCCATAACTTGCCAATATTGCC  
ORF1 > M S E K V S S Q S I T C K H C  
ORF1 > M S E I Q P N Q P I T C Q Y C

AnchoisA 373 S T S L F G Q S N I K L H Q F V C V E Q I Q K N M E E  
AnchoisB 372 CAACTTCATTATTTGGCAATCGAATATCAAGCTTCATCAATTTGTTTTCGTTGAACAAATTTAGAAAAATGGAAAGAA  
372 AGAAAGTATTGTTGGTAATGAACATCAAGGCCATCGTTTATTGTTGATTGAACAATTGAAGAAAAATTTGGAATTA  
Q K V L F G Q L N I K A H R F I C I E Q L K K N L E L

AnchoisA 453 A L N I G G G K N Q R R R N K K C I E R I L Q Q G L E  
AnchoisB 452 GCTTTAAATTTGGAGGAGGAAAAATCAACGAAAGAGAAACAAAAATGCATTTGAAAGAAATTTACAGCAGGGTTTGA  
452 GAATTAAGTTGGCTAAGGAAAAATCAACCGCAGGAGAAACAAAAAGTTTATAGAAAAGTATTGTGACAAAGTTTTAGC  
E L Q V G Q G K N Q R R R T K K F I E K V L Q Q G L A

AnchoisA 533 N F Q Q H Q I K R N Q Q S A Q R N S K L D I K I S D  
AnchoisB 532 AAACCTCCAATAGCCTAAATCAAAAGAAATCAACAAGTGCAAAAGAAATTCGAAATTAGATATCAAAATAGCGACC  
532 AAACCTCCAATAAATGAAATCTAAAGAAATTCAGATCATAGCAAAGGACCTAACACTTAGATGAAAAATGCTAAG  
N F Q Q N E S K R N S D H K Q R T Q H L D E K N A K

AnchoisA 613 Q N F K Q Q Q I N I L E K K E Q Q E S N Q K D K Q Y E  
AnchoisB 612 AAAATTTAAGCAACAGCAAAATAATTTTAGAGAAAAGGAAATAGCAAGAAAACAAATAGAAAAGTAAACAATATGAA  
612 ACAATATTAGCAATAGCAATAAAAATTTAGAAAACAGCAACAGCAGGAAATAAATAAACAGAAAAATAGGCTGAA  
D N I Q Q Q Q L K I S E N Q Q Q Q E I K Q T E K Q A E

AnchoisA 693 E I L S E S K Q E F E Q N I I L R K V K R V V E K W K  
AnchoisB 692 GAAATATTGTAGAGAGCAAGCAAGAATTTGAGCAGAACTATTATTTAAGAAAAGTGAAGAGAGTGGTAGAGAAAGTGGAA  
692 GAAATATTAGCAGAAAATAAATCAAGATGTAGAGCAGAAATATTATTTTGAAGAAAAGTAAAGAGATAGTTGAGAAATGGAA  
E I V A E K N Q D V E Q N I I L K K V K R I V E K W K

AnchoisA 773 C Q R C I K E F M R E Q D G Y R H F E F H H K D L N  
AnchoisB 772 GTGCTAAGATGTATAAAGAGTTTATGAGGGAGCAGGATGGTATCGGCACCTTTGAGTTCCATCATAAGGATTGAAATG  
772 ATGCTAGAAATGCATTAAGAATTCATAGGGAAACAGGATGGATATCGACATTTTGTAGCACCATCATAAAGATTGTAACG  
C Q K C I K E F I R E Q D G Y R H F E H H K D C N

AnchoisA 853 E E E K K F F D S R K K K K G A E A E Q Q Q D E K \* > ORF1  
AnchoisB 852 AAGAGGAGAAAAATTTCTTTGAGCTCGAGAAAGAGAAAAAGTGTGAGAGCAATAGTAGCAGGATGAAAAATGAGAT  
852 AAGAGGAGAAAAATTTCTTTGAGCAGAGAAAGAGAAAAAGTGTGAGAAATCATAGCAATAGCAAGAGAAAAATGATAT  
E E E K K F F E Q R R K K K V A E S Q Q Q Q E E K \* > ORF1

AnchoisA 933 ACCATAAAATAT---ATTAATAAATGCATGAATAATTTTCTACTTCTTTTTCAATAATA---TCATTTCTTCTTTAGA  
AnchoisB 932 ATATATAAATATAAATTAAGCAATATTG---ATCTTTTGTGTTTGTATTAATAATTATTCATTTCTTCTTTAAA  
ORF2 < \* N R R Q F  
ORF2 < \* N R R Q F

AnchoisA 1006 Q Q R Q E V E E Q I G Q N V I E L E E T L K S L K L  
AnchoisB 1009 ATTGCTGTCTCTATTCTACTTCTCTTAAATCCTTAAATCCTATTTCTAATTTCTTCAAGTTAACTTTGATAAATTTAGC  
1009 ACGACTGCGCTTATTAAACTTCTTCTTAAATCCTTAAATTTATTTATTTCTAACCTTTCAGTTAACTTTGATAAATTTAAGC  
S Q A Q Q V E E Q I G Q N I Q E L E E T L K S L K L

AnchoisA 1086 L K K A Q I L E K R A L K K K A A N Q K F I E V Q E K  
AnchoisB 1089 AACTTTTTTGTCTTAAATGAGTCTTTTGCAGCTAACTTTTTTCTAGCTGCATTTTATTAAATATCTCAACTTACTCCTT  
1089 AATTTTTTGTCTTAAATGAGTCTTTTGCAGCTGCTTTTTTCTTTGCTGCATCTTATTAAATTTCTCAACTTCTCCTT  
L K K A Q I L E K R A Q K K K A A D Q K F K E V Q E K

AnchoisA 1166 T R R F Y R L R K N R G I S T D L Q R I L R I N I F I  
AnchoisB 1169 TGTTCGCGAAAATATCTCAGCCTTTTATTCTTCCGATAGAAAGTGTCTAATTAAGCAATCAACCTTATGTTGATAAATA  
1169 CGTTTCGCGAAAATATCTCAACTTTTTGTTTCTTCCAATAGATGTATCTAATTAACGAATCAACTTTAATGAAATAAC  
T R R F Y R L K K N R G I S T D L Q R I L S Q N F Y S

AnchoisA 1246 K C Q I M R R S I Q N I R C K L T K F L S H N P E I  
AnchoisB 1249 TTTTACATTAATCATCTGCGTGAGATTTGATTAATCCTGCCTTTAGGGTTTAAATAAAGAAATGATTGGTTCTATT  
1249 TGTTCATTAATGATCATCTGCGTAAGATTTGATTAATCTTGCCTTTGGGTTCTTGAATAAAGAAATGATTGGATCTATC  
N C Q I M K R L I Q N I K C K P N K F L S H N P D I

AnchoisA 1326 T K L V N V A W T K D P Y N G D S F G L E Q G N L K K  
AnchoisB 1329 GTTTTAAAGAACATTAACTGCCATGTTTATCAGGGTAGTTTCCATCAGAAAAGCCAAGCTCTTAAACATTAGCTTCTTT  
1329 GTTTTAAAGAAATTAGCTGCCATGTTTATCAGGGTAGTTTCCATCAGCAAAGCCAAGCTCTTAGCCATTAGTTTCTTT  
T K L I N V A W T K D P Y N G D A F G L E Q G N L K K

AnchoisA 1406 K I E H L I E E K T A S R L L Q G I Q V K K S E L G F  
AnchoisB 1409 TTTAATTCATGTAATAATTTCTTCTTAGTAGCTGATCTCAGCAGTTATCCTATTTGAACTTTTTTGTATTGATTCAGCAA  
1409 TTAATTCATGTAATAATTTCTTCTTAGTAGCTGATCTTAGCAATTAATCCTATTTGAACTTTTTTGTATTGATTCAGCAA  
Q I E H L I E E K T A S R L L Q G I Q V K K S E L S Y

C Q K T A V K L L Y Q A T V G S S H I A P L Y Y G A  
 AnchoisA 1486 AGCATTATTTAGTAGCAACTTTGAGCAAATATTACGCTGTTACACCTGAAGAATGAATTCGAGGTAAATAATATCCTGCC  
 AnchoisB 1489 AGCATTATTTTGTAGCAACTCTGAGCAAATATTACGCTGTTACACCTGAAGAATGATCGCGGGCAAATAATATCCCGCT  
 C K K T A V R L L Y Q A T V G S S H I A P L Y Y G A  
  
 L I L G Y Y M S E V S G T A Q N A Q F I S I M < ORF2  
 AnchoisA 1566 AAGATTAAAGCCATAGTACATAGATTCAACAGAACAGTTGCTTGTATTAGCTTAGAAAAATGGAATCATGATGAAATTCGA  
 AnchoisB 1569 AAGATTAAATCCATAATACATAGATTCAACAGAACAGTTGCTTAAATTTGCTTGTAAAAATGGAATCATAAAGAAATCTAA  
 L I L G Y Y M S E V S G T A Q N A Q L I S I M < ORF2  
  
 AnchoisA 1646 AAGTTTGTTAATTATTCAAACAATGCGATAGT-AAATTTTATTGAAAAAAAAAATTCCTTTTAAACCAATCAATTCAA  
 AnchoisB 1649 ATCTTTGTTCATTAATTTAAAAAATGCAAAAGCAAAATTTATATTGAAAAAAAAAATTCCTTTTCAACCAATCAAAATTGAA  
  
 AnchoisA 1725 AGCAATTGATT-----TTAAAAAGCAGAAAAACAATTTAGAATAAAATTAAGAAAAATATTAATGATTTATAATTTAATG  
 AnchoisB 1729 AGCAATTATCGCAAATTAATAAATAAATAAAGAAATAAAACAAAATAATA-----TTATTTTTTAAATA  
  
 AnchoisA 1800 CAACCTTAAACTGCTTTTTATTGAAATTAATTAATAAGGATTTTTTGTTTGAATGGAGAAAAATTTTTG--AT  
 AnchoisB 1803 TAAATTAACATAGCATCTTTATTGGATTATTTTTAAATTCAGATTTTT--TCAAATAATGACAAAAATTTTTTCCAT  
  
 AnchoisA 1878 TCAATTTTGATTA-----TTGATTCGAATTTTAGATTAT-AGCTCCAATTTTATGCAAGAAATTTAATTTTCCAC-  
 AnchoisB 1881 TCAATTTGTATTATTGGATGTTGGTATGAATTTTAGAATATGAAATCTTATTTAT-TGCAATAAATTCATTATTTCATA  
  
 DDE > M Q I E T Q A S S S L R P Y A Q T  
 AnchoisA 1949 ATTTAATGTAAATAGAACTCAAGCTT--CTTCATCTCTGTACATATATTATTGCTATAGCAGGCCATATGCTTAAAC  
 AnchoisB 1960 ATTTAATGTAAATAGAACTCCAGCTTCAACTTCTTCTGTATAATATTATTGCTATAGCAGGCCATTACATTTAAAC  
 DDE > M Q I E T P A S T S S L R P Y T Q T  
  
 T I C R H I C D D H C Q Q F Y Q T Y V Y E K R L L  
 AnchoisA 2026 AACAAATATGTAGACACATATGCGATGATCATGTCTAATAATTTTACTAAACCTATGTTATG-----AAAAAGACTTTTAA  
 AnchoisB 2040 TACATATGTAGACATACATGCAATGATGACGTCAATAAATTTTATTAACCTATGCTATGAAAAAATAAATTTTCA  
 T L C R H T C N D D C Q Q F Y Q T Y V Y E K K K I F  
  
 I K T K Q Q M L E L L T L E D A H K I I K Q K L E S T  
 AnchoisA 2103 TCAAAACCAATAGCAATGCTGGAACTGCTTACTCTAGAGGATGCTCATAAATTAATAAAACAAAAATAGAAATCCACA  
 AnchoisB 2120 TCAAAACCAACAGCAATGCGAGAAATGATTTACTTTGGATGATGCGCTTAAATTTATAGCAAAATTTATAAAACAAA  
 I K T K Q Q L Q L Q E I T L D A L K I I Q Q K L Q T K  
  
 R E V K L R K N I N K F E K K S N F K S L T L K L Q  
 AnchoisA 2183 AGGGAAGTAAAGTTGAGAAAAAATATAAACAATTTGAGAAAAAAGCAACTTCAAATC---ATTAACTTTAAATGCA  
 AnchoisB 2200 AGGGAAGAAACCTAGAAAAAAGATTAACAACCTAAGAGAGCAAAATATATTAAATCTTAACCTTTCAAGTTAA  
 R E E T L R K K I N K P K R A N I F K S Q L T F K L K  
  
 K I A L E L G N S V K P A I L A G Y L G I S I G R A  
 AnchoisA 2260 GAAATTTGCTTTAGAAATAGGAAATTCGGTAAACCTGCAATTTTGGCAGGATATTTAGGAATTTCTATTGGAAGAGCTA  
 AnchoisB 2280 GTAAATTTGCTTTAAGAATTAGGAACTTCTATAAAACCTGCAATTTTAAAGCAGGATATTTAGGAATTTCAATGGAAGGCTA  
 Q I A Q E L G T S I K P A I L A G Y L G I S I G R A  
  
 K Y L Q K Y V L Q Q P D L Q R Q Q L A F K F D A Q H K  
 AnchoisA 2340 AATATTTATAAAGATAGTTTTCAGCAACCTGATTTCAGAAAGACAATAAATCTGCTTTTAAATTTGATGCATAACATAAA  
 AnchoisB 2360 AATATCTATAAAGATAGTTTCAGAGATATCCCGATTCTCGAGTCAATAAATTTGCTTTTTCATTTGATGAATAGCAAAA  
 K Y L Q K Q V R E Y P D S L S Q Q F A F S F D E Q H K  
  
 F W I Q K F V A Q E N V A R L S S A K Q I Y Q E F I A  
 AnchoisA 2420 TTTTGGATTAAAAATTTGTAGCTCAAGAAATGTTGCTCGCTTGGAGCAGTGCAAAATAAATCTATTAGAATTTATAGC  
 AnchoisB 2440 TTTATGGATTGAAAAATTTGTAGCTTAAGATAATGTTGACACTTGGAGCAGTGCAAAATAAATAATTAAGAATTCATTGT  
 L W I E K F V A Q D N V A H L S S A K Q I Y Q E F I V  
  
 N F H I C K Q Q L Q F H Q F F K Q F K Q L W L Y T Y  
 AnchoisA 2500 AAATTTTCATATTTGCAAAATGCAACTGCAGTTTCATTAATTTTTAAGTAGTTTAAACAGCTTTGGTTATATACCTATC  
 AnchoisB 2520 AAATTTTCATATTTAATCAATAACAACCTGCAATTTTCATTTTTTTAGTGGTTTAAAGCAACTTTGGTTGTATACCTATC  
 N F H I N Q Q Q L Q F H S F F Q W F K Q L G L Y T Y  
  
 R L F S C V N F K S Q T K C S L D R R F E F A K Q L A  
 AnchoisA 2580 GCTTATTTAGTTGCGTTAATTTTAAATCTCAACTAATGTTCTTTTAGACAGAAAGTTTGAATTTGCAAAATAATTAGCT  
 AnchoisB 2600 GCTTACTTAGTTGCTTTAATTTTAAATCTCAAACTCAATGCTCTTTTAGAAGAAGATTTGAATTTGCAAAATAATTAAC  
 R L N F K S Q Y T K C S L E R R F E F A K Q L T  
  
 T L L N S K Q K I V Y I D E C S F G R N L K V A R G W  
 AnchoisA 2660 ACTCTTTTAAATTTCAAAATAAAAAATTTGTTTACATTGATGAGTGCAGTTTTGGGAGAAAATTTAAAGTTGCAAGAGGTTG  
 AnchoisB 2680 ACTCTTCTAAGTTTAAATTTAAAAATTTAGTCTACATTGATGAGTGTAGCTTTGGGAGAAAATTTAAAGCTGGACGATGCTG  
 T L L S Q N Q K L V Y I D E C S F G R N L K A G R C W  
  
 Q K K N T F P L L Q I K S S S S K N K C V I G A I A  
 AnchoisA 2740 GTAAAAAAGAACACTTTTCCATTATGCAAAATTAATCAAGCTCATCAAAAAATAAATGTTGTTATTGGAGCTATAGCTT  
 AnchoisB 2760 GCAAAAAAAGAAATAGTTATCCATTGCTTAAATAAATCGAACTCTCAAAAAATAAATGTTGTTATTGGTGTCTATCTGTT  
 Q K K N S Y P L L Q I K S N S S K S K C V I G A I C  
  
 C D G F I A Y K C V I G N V N Q Q V F G E F L N E L L  
 AnchoisA 2820 GTGACGGGTTTATTGCTTCAAAATGTTTATAGGAAATGTTAATCAATAGGTTTTTGGGAGAAATTTTGAATGAACCTCTA  
 AnchoisB 2840 GTGATGGGTTTATTGCTTAAATGTTTATCGGAAATGTTAATCAATAGGTTTTTGGGAGAAATTTTGAATGAACCTTTA  
 C D G F I A Y K C V I G N V N Q Q V F G E F L N E L L  
  
 R L L Q Q N S E E N N F C L V L D N A S I H R T S Q I  
 AnchoisA 2900 AGGCTGCTTTAGCAGAAATAGTGAAGAAAAATAATTTTTGCTTGTGCTGGCAATGCATCTATCCAACGACATCAAAAT  
 AnchoisB 2920 AAGCTGCTTTAGCAAAATAATGAAGAAAAATAATTTTTGCTTGTGCTGGCAATGCATCTATCCAACCGAACATATAAAT  
 K L L Q Q N N E E N N F C L V L D N A S I H R T Q Q I

L D Q L S Y V N Y L F L P P Y S P Q L N C I E K L W  
 AnchoisA 2980 TTTGGATTAATTGTCATTATGTGAACATTTATTTCTCCACCATATAGTCCTTAGCTTAATTGCATTGAAAAGCTATGGG  
 AnchoisB 3000 TCTGAATCAATTATCATTTGTAAATTTATTTCTCTCCATATAGCCCTTAGCTTAACTGCATCGAAAAGCTGTGGG  
 L N Q L S F V N Y L F L P P Y S P Q L N C I E M L W  
  
 G V A K Q K L S K M H F A T T F Q E F H N I H F V L N  
 AnchoisA 3060 GAGTAGCAAAACAAAAGCTCTCCAAAATGCACTTCGCAACACATTTTAAGAATTTCAACAATTCATTTTGTGCTTAAAC  
 AnchoisB 3080 GAATTGCTAAGCGATAGCTCTCTAAAATGCATATGCAACTACTGCCAAGAATTTATAAATACATGTTGTGCTTAAAC  
 G I A K R Q L S K M H I A T T A Q E F Y N I H V V L N  
  
 S I T A N Q V Q N I C T F N L K F L Q A C L H R Q Q F  
 AnchoisA 3140 TCAATTACAGCTAATTAAGTGCAAAATATTTGCACCTTTAACTTGAAATTCCTGCAAGCTTGCTTACATAGACAGCAGTT  
 AnchoisB 3160 TCTATTACAACAACCTCAAGTTCAAAACATCTGCACCTCAAACCTAAAATTCCTAGAAGCTTGCTTGTACGAAAATAATT  
 S I T T T Q V Q N I C T S N L K F L E A C L L R K Q F  
  
 \* > DDE  
 AnchoisA 3220 TTGAT-TAATTATATTTTCATTTAAACATAAATA----TTCAATGCAAGCAATTAACAATAAAAAATCTCTACTCTTT  
 AnchoisB 3240 CTGATGCTATTATA-TACAATTTAAATTTTAAATATAAAGTTTCAAT---AGTAAATG--AGCAAAAAGTCTCCGATTCCT  
 \* > DDE  
  
 AnchoisA 3295 TCTTATAGCGACAGTGT-GCAAAGCAGACT-TTCGTCAGTTATAC-TTAACACTATCGAGCAGATATTAATAAGAGCAG  
 AnchoisB 3314 TCGAATAGCGATGGTGTAGCAACTGCAGATTGTTAGTCTGGAATGCTTTAACACTTTCAGCAGATTTAGTTCGAAGCAG  
  
 AnchoisA 3372 AGTTTCGAATCGGGGGACAGGATGGGATCTAAAACACTCGCTCCTTAACTTTCCAGCCTATTCTCAATACTATTAGACT  
 AnchoisB 3394 AGTTTCGAATCGGGGGACGAAAGGGAGCTAAATCACTCGCTCCTTAACTCTATCCAGCCAACCTCTCAATATAACAAGCCT  
  
 AnchoisA 3452 CTGATTTAATTATATATTTTAAAATTTGAT----AAAATAAATTATGGGTTTGGGTAATTCATTAATATTATATAAT  
 AnchoisB 3474 TTCATTTTATTATAGTTT----TTGATTATAAAAAATAAATTATGGGTTT-GTGTGATTCATGAGTGATTATATAATA  
  
 AnchoisA 3528 TATATATAATTTATATATATAA-AAATTTATAT----AATCCTGCAAAGCAGAAAGTCAAATGTATTGACTATA  
 AnchoisB 3549 AAAATA-GATTTATATATAAAGAAATAATATCAGGAAAGTCTGAAGAAGTAGA---TGAAATGTATTGACTATA

CTG40749b  
IES77  
CTG23427  
CTG35975  
CTG21499  
CTG40749  
IES128  
CTG28766  
IES98  
CTG10063  
**Anchoisa** 1 TATAGTCTAAAATTATTGAAGATTCAAATTGCTTTGAGTTGCAAA---AATGA--CTTTTTTTGCTGAAGCAGAAAGAA

CTG40749b  
IES77  
CTG23427  
CTG35975  
CTG21499  
CTG40749  
IES128  
CTG28766  
IES98  
CTG10063  
**Anchoisa** 77 ACAAGA----AATAAATTAATATAGTACGAATAAGAATTTTAAATATTTTTTTCCCAATTTTGATTTCTCCCTAAATT

CTG40749b  
IES77  
CTG23427  
CTG35975  
CTG21499  
CTG40749  
IES128  
CTG28766  
IES98  
CTG10063  
**Anchoisa** 152 TGCATTAATATATTTCCCTGCTGTTAATTTGCTGTTATATTTAGTTTATAAATATTCAGATAATATAAAAAAATAAATTAG

CTG40749b  
IES77  
CTG23427  
CTG35975  
CTG21499  
CTG40749  
IES128  
CTG28766  
IES98  
CTG10063  
**Anchoisa** 232 TGCAATTTAATTTAGAAAAGT-TTTTCTAAGAGAATTTAATTAATAAAA-ATCTGCCTG---CAATTTATCG--TTT

CTG40749b  
IES77  
CTG23427  
CTG35975  
CTG21499  
CTG40749  
IES128  
CTG28766  
IES98  
CTG10063  
**Anchoisa** 306 TCAATATTATCATCAAATAAATGCTGAAAAGGTTTCCAGCTAATTTATAACTTATAAATATTGCTCAAC--TTCATTA

CTG40749b  
IES77  
CTG23427  
CTG35975  
CTG21499  
CTG40749  
IES128  
CTG28766  
IES98  
CTG10063  
**Anchoisa** 384 TTTGGACAATCGAATATCAAGCTTCATCAATTTGTTTGCCTTGAAC-AAATTTAGAAAAATATGGAAGAAGCTTTAAATA

CTG40749b  
IES77  
CTG23427  
CTG35975  
CTG21499  
CTG40749  
IES128  
CTG28766  
IES98  
CTG10063  
**Anchoisa** 463 TTGGAGGAGGGAAAAATCAAAGAAGTGAACAATAAATGCA-TTGAAAAGAAATTTTACAGAAGGGTTTGTAA-AAAATTTCC



CTG40749b -----  
IES77 AA-TAGCACT-----AAAAT  
CTG23427 -----  
CTG35975 AA-TACAACATAAATCAAAAG-----AAAGTGCAC-TAAGAAATTCAAAAT-----AGCAACCAAAAT  
CTG21499 AA-TAGCGCT-----  
CTG40749 AA-TAGCACTAAATCAAAAATAAATCAAC-AAAGTGCACAAAAGAAATTCGAAATTAGATTTCAAGATTAGCGACCAAAAT  
IES128 AA-TACAACATAAATCAAAAAGAAATAAAC-AAAGTGCAC-AAAGAAATTCGAAATTAGATATCAAAAATTAGTGAATCAAAAT  
CTG28766 -----  
IES98 AAATAGTGCTAAATCAGAAGAAATCAACAAAAGTGCAT-AAAGAAATTCAAAATTAGA-----GACCAAAAT  
CTG10063 -----  
**Anchoisa** 541 AA-TAGCACTAAATCAAAAAGAAATCAAC-AAAGTGCAC-AAAGAAATTCGAAATTAGATATCAAAAATTAGCGACCAAAAT

CTG40749b -----  
IES77 TTTAGCAACAGCAAAATAAATATTTTAGAGAAAAAGGAATAGCAAGAAAGCAATTAGAAAGATAAACAATATGAAGAAAT  
CTG23427 -----  
CTG35975 TTTAAGCGACAACAATAAATATTTTAGAGAAAAAGGAAGAGTA-----  
CTG21499 -----  
CTG40749 TTTATGCAACAGCAAAATAAATATTTTAGATATAAAAAGAAATAGCAAGAAAGCAATAAGAAAGATAAACAACATTAAGAAAT  
IES128 TTTAAGCAACAGCAAAATAAATATTTTAGAGAAAAAGGAATAGCAAGAAA-CAATTAGAAAGATAAACAATATGAAGAAA-  
CTG28766 -----AGCAATTAGAAAGAT-TACAATATGAAGAAAT  
IES98 TTTCAACGACAGCAAAATAAATATTTTAGAGAAAAAGGAAAGCAAAAAGCAATTAGAAAGATAAACAATATGAAGAAAT  
CTG10063 -----  
**Anchoisa** 618 TTTAAGCAACAGCAAAATAAATATTTTAGAGAAAAAGGAATAGCAAGAAAGCAATTAGAAAGATAAACAATATGAAGAAAT

CTG40749b -----  
IES77 ATTTGTCAGAGTGCAAGCAAGAATTTGAGCAGAACATTTATTTAAGAAAAGTGAAGAGAGTGGTAGAGAAGTGGAGTGAT  
CTG23427 -----  
CTG35975 -----  
CTG21499 -----  
CTG40749 ACTGTCAGAGAGCAAGCAAGAATTTGAGCAGAACATTTATTTAAGAAAAGTGAAGAGAGTAGTAGAGAAGTGGAGTGCT  
IES128 ATTTGTCAGAGAA--GCAAGAATTTGAGCAGAACATTTATTTAAGAAAAGTGAAGAGAGTGGTAGAGAAGTGGAGTGCT  
CTG28766 ATTTGTTAGAGAGCAAGCAAGTATTTGAGTAGAGTATTACTTTAAGAAAAGTGA-----GGAAGTGCT  
IES98 ATTTGTTAGAGAAACAGCAAAATAAATTTGACAGAACATTTATTTAACAAGCAAAAGTGAAGAGAGT-GTAGAGAAGTGGAGTGCT  
CTG10063 -----  
**Anchoisa** 698 ATTTGTCAGAGAGCAAGCAAGAATTTGAGCAGAACATTTATTTAAGAAAAGTGAAGAGAGTGGTAGAGAAGTGGAGTGCT

CTG40749b -----  
IES77 AAAGATATATTAAAGAGTTTATGAGG-----CGGCACCTTTGAGTTCATCATGAGGATTTGAATGAAA  
CTG23427 -----  
CTG35975 -----  
CTG21499 -----  
CTG40749 AAAGATTTATAAAAGAGTTCATGAGGGAGCAGGATGGGTATCAGCACTTTTAGTTCATCATAAGAAATATGAATGAAGAA  
IES128 AAAGATGTATAAAAAGGTTTCATGAGGGAGCAGGATGGGTATCGGCACCTTTGAGTTCATCATAAGGATTTGAATGAAGAT  
CTG28766 AAAGATGTATAAAAGAGTATATGAGGGAGCTGGATGGGCTCTTTCAATTTGAGTTCATCATAAAAATTTGAATGAAGAA  
IES98 AAAGATGTAT-AAAGATTTTCATGAGGGAGCAGGATGGGTATCGGCACCTTCGAATTCATCATAAGATTTGAATGAAGAA  
CTG10063 -----  
**Anchoisa** 778 AAAGATGTATAAAAGAGTTCATGAGGGAGCAGGATGGGTATCGGCACCTTTGAGTTCATCATAAGGATTTGAATGAAGAA

CTG40749b -----  
IES77 GAGAAAAATCTTTGACTCGAGGAAGAAGAAAAAAGTGTGTAAGCAGAAATAGTAGCAGGATAAATA-----  
CTG23427 -----  
CTG35975 -----  
CTG21499 -----  
CTG40749 GAGA-AAATGTTCTTTGACTCGAG--GAAGAAAAAGGTGCTGAAGCAGAAATAGTGGGAGGATGAAAAATGAGATACAAA  
IES128 GAGAAAAAGCTCTTTGAACTCGAGAAAGAAAGAAAA-AGTGTGTAAGCAGAAACAGTAGCAGTATGAAAAATGAGATACCAT  
CTG28766 GAGAGAAAGTCTTTAACTCTAGAAAAGGAAAAA-GGTGTGTAAGCAGAAATAGTAGCAGGATGAAAA-TGAGATACCAT  
IES98 GAGATAAAGTCTTTGACTAGAGAAAAGAAAAATGATGTGTAAGCAGAAATAGTAGCAGGATGAAAAATGAGATACCAT  
CTG10063 -----  
**Anchoisa** 858 GAGAAAAAGTCTTTGACTCGAGAAAGAAGAAAAAAGGTGTGTAAGCAGAAATAGTAGCAGGATGAAAAATGAGATACCAT

CTG40749b -----  
IES77 -----AATTTCTACTTC--TTTTTCATAAATAATCAATTTCTTC--TTTGAATTTGCTG  
CTG23427 -----  
CTG35975 -----  
CTG21499 -----  
CTG40749 AACATATATATAAAA-ATGCATG-AATAATTTTCTACTTC--TTTTTCATAAGCAATCAATTTCTTTTGAATTTGCTG  
IES128 AAAATATATAAAAA--TGCATG-AATAATATTAFACTTCTTTTTTCATAATAACAATTTCTTC--TTTGAATTTGCTG  
CTG28766 ATAATATATAAAAAATATGCATGAAATAATTTTCTACTTA--TTTTTCATAATGATCAATTTCTTC--TTTGAATTTGCTG  
IES98 AGAATATATAAAAA-ATGCATG-AATAATTTTCTACTTC--TTTTTCATAAATAATCAATTACTTC--TTTGAATTTCTG  
CTG10063 -----  
**Anchoisa** 938 AAAATATATAAAAA-ATGCATG-AATAATTTTCTACTTC--TTTTTCATAAATAATCAATTTCTTC--TTTGAATTTGCTG

CTG40749b -----  
IES77 TCTCTATTCTATTTCTCTTAAATTCCTTAATTCATTTATTCTAATTTCTCAGTTAACTTTGATAATTTTAGCAAC--AT  
CTG23427 -----  
CTG35975 -----  
CTG21499 -----  
CTG40749 TCTCTATTCTGCTCCTCTTAACTCCTTAATTCATTTCTCAATTTCTCAGTTAACTTTGATAATTTAGCACC--TT  
IES128 TCTCTATTCTACTTCTCTTAAATTCCTTAATTCATTTCTAATTTCTCAGTTTACTTTGATAATTTAGCAAC--TT  
CTG28766 TCTCTATTCTACTTCTCTTAAATTCCTTAATTCATTTCTAATTTCTTATTTAGTTAACTTTGATAATTTAGCAACCTTT  
IES98 TCTCTATTCTACTCCTCCTTAAATTCCTTAATTCATTTCTAATTTCTCAGTTAACTTT-----  
CTG10063 -----  
**Anchoisa** 1013 TCTCTATTCTACTTCTCTTAAATTCCTTAATTCATTTCTAATTTCTCAGTTAACTTTGATAATTTTAGCAAC--TT

CTG40749b -----  
IES77 TTTTGCTTAAATAAGTTCCTTGCGAGC-----TAAGCAGCATTTTATTTAAATATCTCAACTTACTCCTTTATTC  
CTG23427 -----  
CTG35975 -----  
CTG21499 -----  
CTG40749 TTTTGCCTAAATGAG-----TTAGCTGCATTTTATTTAAATA-----GTTC  
IES128 TTTTGCTTAAATGAGTTCCTTGCGAGCTGACTTTTTCTTAGCTGCATTTTATTTAAATATCTCAACTTACTCATTGTTC  
CTG28766 TTTTGCTGAAACAAGTTCCTTGCGAGCTAACTTTTTCTTAGCTGCATTTTATTTAAATATACCCACTTACTCCTTTGTTC  
IES98 -----TTCTTAGCTGCATTTTATTTAAATATATCAACTTACTCCTTTGTTC  
CTG10063 -----  
**Anchoisa** 1091 TTTTGCTTAAATGAGTTCCTTGCGAGCTAACTTTTTCTTAGCTGCATTTTATTTAAATATCTCAACTTACTCCTTTGTTC

CTG40749b -----  
IES77 TGC-CAAATATCTTGGCCTTTTATTTCTCCGATAGAAGTGTCTAATTAGCGAATCAATCTTGTGTGATAAATATTTTA  
CTG23427 -----  
CTG35975 -----  
CTG21499 -----  
CTG40749 TCGAAAAATATCTCAGCCTTTTATTTCTTTCGATCGAAGTGTTTAATTAGCGAATCAACCTTATGTTGATCAATATTTTA  
IES128 TGCAAAAATATCTCAG-CTTTTATTTCTCCGATAGAAGTTCCTAATTGCGAATCAACCTTATATGATAAATATCTTA  
CTG28766 TGCAAAAATATCTCAGCCTTCTATTTCTT-CGATAGAAGTGTTTAATTAGCGAATCAACCTTATGTTGATAAATATTTTA  
IES98 TCGAAAAATATCTCAGCCTTCTATTTCTTCCGATAGAAGTGTCTAATTAGCGAATGAGAACTTATGTTAATAAATATTTTA  
CTG10063 -----  
**Anchoisa** 1171 TCGAAAAATATCTCAGCCTTTTATTTCTTCCGATAGAAGTGTCTAATTAGCGAATCAACCTTATGTTGATAAATATTTTA

CTG40749b -----  
IES77 CATTAAATCATACTGCGTGAGATTTGATTAATCCTGC-CATTAGGGTTTGTAAATAAGGAGTGATTTGGTTCATTGTTT  
CTG23427 -----  
CTG35975 -----  
CTG21499 -----  
CTG40749 CATTAAATCATCCAGCGTGAGATTTGA-TAATCTTGT-----AGGGTTTTTAAATAAA-AAFGATTTGGTTCATTGTTT  
IES128 CATTAAATCATCTTTGTGAGATTTGATTAATCTCGACTTTACGGTTT-TAAATAAAGAATATTTGGTTCATTGTTT  
CTG28766 CATTAAATCATCTATGTGAGATTTTATTAATCTTCACTTTAGGGTTTTTAAATAAAGAATATTTTGGATTCTATTGTTC  
IES98 CATT-AAATCATCTGCGTGAGATTTGATTAATCCTGC-----  
CTG10063 -----  
**Anchoisa** 1251 CATTAAATCATCTGCGTGAGATTTGATTAATCTCGACTTTAGGGTTT-TAAATAAAGAATGATTTGGTTCATTGTTC

CTG40749b -----  
IES77 TAAGAAATAAATACTGCCAATGTTTTATCAAGGTAGCTTTCCATCAGAAAAGCCAAGCTCTTAACAATAAATAATCTTTTT  
CTG23427 -----  
CTG35975 -----  
CTG21499 -----  
CTG40749 TAAGAACGTTAACTGCCATGTTTTATCAAGATAA-TTCCATCAGAAAAG-CAAGCTCTTAACCATTAGCTTCGTTTT  
IES128 TAAGAACATAAATACTGCCATGTTTTATCAGGGTAG-TTCCATCAGAAAAGCCAAGCTCTTAACCATTAGCTTCGTTTT  
CTG28766 TAAGAACATAAATACTGCCATG-TTTAACAGGGTAG-TTCCATCAGAGAAGCCAAGCTCTTAATCATTAAGCTT-TTTTT  
IES98 -----TCCTATTTGA--TTTTTTGACTCTAAGACAACGC  
CTG10063 -----  
**Anchoisa** 1330 TAAGAACATAAATACTGCCATGTTTTATCAGGGTAG-TTCCATCAGAAAAGCCAAGCTCTTAACCATTAGCTTCTTTT

CTG40749b -----  
IES77 ATTTTCATGTAATAATTTCTTATTTGGTAGCTGATCTCAGCAGTTATCCTATTTGAACTTTTTTTGATTCTAAGCCAAGT  
CTG23427 -----  
CTG35975 -----  
CTG21499 -----  
CTG40749 AATTTTCATATAAATAATTTCTTTTAGTAG-TGATCTCAGAAAGTCAATTTTCTCTTTTTTTGATTCAAGCCAAA  
IES128 AATTTTCATGTAATAATTTCTTTT-GTATCTGATCTCAGCAGTTATCCTATTTCAACTTTTTTTGATTCTAAGCCAAGC  
CTG28766 AATTTTCATGTAATAATTTCTTTTATTTGGCTGAGCTCAACAGTTATCCTATTTAACTTTTTTTCT-CTCTAAGCCAAGC  
IES98 -----TCCTATTTGA--TTTTTTGACTCTAAGACAACGC  
CTG10063 -----  
**Anchoisa** 1409 AATTTTCATGTAATAATTTCTTTTAGTAGCTGATCTCAGCAGTTATCCTATTTGAACTTTTTTTGATTCTAAGCCAAGC

CTG40749b -----  
IES77 ATGATTTAGTATCAACTTTGAGCAAATAATACGCTGTCACACCTTAAGAATGAATTGCAGGTAAATACTAACCTGCCAAG  
CTG23427 -----  
CTG35975 -----  
CTG21499 -----  
CTG40749 ATT-----TTTTGAGCAAATATTAAGCTGTACACCTGAGGAATGAATTGGGTAATAAATATCATACGAAG  
IES128 ATT--TTAGTAGCAACTTTGAGCAAATATACGCTTTTACACTCTGAAGAATGAATTGCAGGTAAATAAATATCCTGCC-AG  
CTG28766 ATTATTAATAGCAACTTTGAGCAAATATAC-CTTTTACACCTGAAGGATGAATTGCATTAGAGTAATATCCTTTCAAG  
IES98 ATT-TTTAGTAGCAACTTTGATCAAAAGATTACGCTGTACACCTGAAGAAATAA-----TATCCCCTGCCAAG  
CTG10063 -----  
**Anchoisa** 1489 ATTATTTAGTAGCAACTTTGAGCAAATATACGCTGTACACCTGAAGAATGAATTGCAGGTAAATAAATATCCTGCCAAG

CTG40749b -----  
IES77 ATTAAGCCAAGTACATGGATTCAACAATAACAGTTGCTTGTATTAGCTTAG-AAATGGAAATCATGATG-AATTTTGGAA  
CTG23427 -----  
CTG35975 -----  
CTG21499 -----  
CTG40749 ATTAAGCCATGTACATAGATTTAACAGAACCAATCACTTGTATTAGTTTACAAAATGGAAATCATGATG-AATTTGAAA  
IES128 ATTAACCAATAGTACATAGATTTAACAGAACCAGTTGTTGATTAGCTTAGAAAACGGAAATCAAGATG-AATTTGAAA  
CTG28766 ACTAAGCTATAATACATAAATCAAGGAACAGTTGAATGATTAGC-----AAATGGAAATCATGATGAAATTTCAATA  
IES98 ATTAAGCCA-----  
CTG10063 -----  
**Anchoisa** 1569 ATTAAGCCATAGTACATAGATTTAACAGAACCAGTTGCTTGTATTAGCTTAGAAAATGGAAATCATGATG-AATTTGAAA

CTG40749b -----  
IES77 GCA T G T T T A A T T A T T C A A A C A A C G C G A T A G T A A A T T T T T A T T G A - A A A A T A A G T T C T T T T T T A A C C A A T C A A T T T G A A A G  
CTG23427 -----  
CTG35975 -----  
CTG21499 -----  
CTG40749 G T T T G T T T A A G T A C T T G A A C A A T G T G A T A G T A A A T T T T T A T T G A - A A A A A T A T T C T G T T T T A A C C A A T C A A T T T C A A A G  
IES128 G T T T G T T T A A T T A T T A A A A C A A T G C G A T A G T A A A T T T T T A T T G A A A A A A A A A T C T T T T T T T A C C A A T C A A T T T C A A A G  
CTG28766 G T T T G T T T A A T T A T T C A A A C A A T G C A A T A -----  
IES98 -----  
CTG10063 -----  
**Anchoisa** 1648 G T T T G T T T A A T T A T T C A A A C A A T G C G A T A G T A A A T T T T T A T T G A - A A A A A A A T T C T T T T T T A A C C A A T C A A T T T C A A A G

CTG40749b -----  
IES77 C - A A T T G A T T T T - T A A A G C A G A A A A C A A T T T A G A A T A A A T T A A A G A A A A A T A C T T A A A T G A T T T A T A A T T T - A A T A C A A A  
CTG23427 -----  
CTG35975 -----  
CTG21499 -----  
CTG40749 C - A A T T G A T T T T A A A A A G C A G A A A C A A T T T A G A A T A A A T T A A G A A A A A T T A - T T A A A T G A T T A A T A A T T  
IES128 C A A A T T A A T T T T - A A A A G C A G A A A A C A A T T T A G A A T A A A T T A A A G A A A A A T A - A T A A A T G A T T T A T A A T T T T A A T G C A A C  
CTG28766 -----  
IES98 -----  
CTG10063 -----  
**Anchoisa** 1727 C - A A T T G A T T T T - A A A A G C A G A A A A C A A T T T A G A A T A A A T T A A A G A A A A A T A - T T A A A T G A T T T A T A A T T T T A A T G C A A C

CTG40749b -----  
IES77 T T A A A T A C T G C T T T T T A T T G A T T A T A T T T A T A G T G A G A A T T T T - - - T T T T G A A T T A A A G T A A A A T A T T T T G A T T A A A T  
CTG23427 -----  
CTG35975 -----  
CTG21499 -----  
CTG40749 -----  
IES128 T T A - - - - - - - - - - T T T T A T T G A A T T A T A T T T A T A A T G A G G A T T T T T G T T T G A A T T G G A G - A A A A T A T T T T G A T T C A A T  
CTG28766 -----  
IES98 -----  
CTG10063 -----  
**Anchoisa** 1804 T T A A A T A C T G C T T T T T A T T G A A T T A T A T T T A T A A T G A G G A T T T T T G T T T G A A T T G G A G - A A A A T A T T T T G A T T C A A T

CTG40749b -----  
IES77 T T T - - - - - - - - - - T T T T T A T T G G C G C T C A A A T T T T A T G C C A G A A A T T T A A T T T T T C C A C A T T T A A T G T A A A T A  
CTG23427 -----  
CTG35975 -----  
CTG21499 -----  
CTG40749 -----  
IES128 T T T G A T T A T T G A T T C G A A T T T T A G A T T A T A G C T C C A A T T T T A T G C A A G A A A T T T A A T T T T C C A C A T T T A A T G T A A A T A  
CTG28766 -----  
IES98 -----  
CTG10063 -----  
**Anchoisa** 1883 T T T G A T T A T T G A T T C G A A T T T T A G A T T A T A G C T C C A A T T T T A T G C A A G A A A T T T A A T T T T T C C A C A T T T A A T G T A A A T A

CTG40749b -----  
IES77 G A A A C T C A G C T T C T C A T T A G T G T A C A T A T A T T A T T T G C T A T A G C A G G C C T T A T G C T T A A A T A A C A A T A T T T A T A C A C A  
CTG23427 -----  
CTG35975 -----  
CTG21499 -----  
CTG40749 -----  
IES128 G A A A C T C A A G C T T C T C A T C T G T A C A T A T A T T A T T T G C T A T A G C A G G C C A T A T A C C T A A A C A C A A T A T G A A G A C A C A  
CTG28766 -----  
IES98 -----  
CTG10063 -----  
**Anchoisa** 1963 G A A A C T C A A G C T T C T C A T C T G T A C A T A T A T T A T T T G C T A T A G C A G G C C A T A T G C T T A A A C A C A A T A T G T A G A C A C A

CTG40749b -----  
IES77 T A T G C G A T G A T C A T T G C T A A T A A T T T - A C T A A A C C T A T G T T T A T G A A A A A A A A T T T T A A T C A A A C C A A A T A G C A A A T G  
CTG23427 -----  
CTG35975 -----  
CTG21499 -----  
CTG40749 -----  
IES128 T T T G C A A T G A T C A T T G C T A A T A A T T T T A C T A A A C C T A T G T T T C T G A A A A A A G A C T T T T A A T C A A A C C A A A T A G C A A A T G  
CTG28766 -----  
IES98 -----  
CTG10063 -----  
**Anchoisa** 2043 T A T G C G A T G A T C A T T G C T A A T A A T T T T A C T A A A C C T A T A C T T A T G A A A A A A G A C T T T T A A T C A A A C C A A A T A G C A A A T G  
T A T G C G A T G A T C A T T G C T A A T A A T T T T A C T A A A C C T A T G T T T A T G A A A A A A G A C T T T T A A T C A A A C C A A A T A G C A A A T G

CTG40749b -----  
IES77 C T G G A A T T G T T T A C T C T A G A G G A T G C T C A T A A A A T T A T A A A C A A A A - T T A G A T T C C A G A A G G A A G T A A A G T T G A G A A A  
CTG23427 -----  
CTG35975 -----  
CTG21499 -----  
CTG40749 -----  
IES128 C T A G A A C T G C T T A C T T T A A A G G A T G C T A T A A A A T T A T A A A C A A A A G - - T A G A A T C C A C A A G G G A A G T A A A A T T G A G A A A  
CTG28766 -----  
IES98 -----  
CTG10063 -----  
**Anchoisa** 2123 T T G G A A C T G C T T A C T C T A G G T G A T G C T C A T A A A A T T A T A A A C A A A A A T T A G A A T C C A C A A G G G A A G T A A A G T T T A G A A A  
C T G G A A C T G C T T A C T C T A G A G G A T G C T C A T A A A A T T A T A A A C A A A A A T T A G A A T C C A C A A G G G A A G T A A A G T T G A G A A A

CTG40749b -----  
 IES77 AAATATGAACAAATTTGAGAAAAAAGCAACTTCAATCATTAACCTTAAAAAATTTGCGAAAA----TTGC-TTAGA  
 CTG23427 -----  
 CTG35975 -----  
 CTG21499 -----CAAATCAATCATTAACCTTAAAA----TTGCAGAAAAATAATGATTAGAA  
 CTG40749 -----  
 IES128 AAA-ATAAA-AAATTTGAGAAAAA-AGCAACTTCGAATCATTAATTTAAAA----TTATAGAAAA----TTGCTTTAGA  
 CTG28766 -----  
 IES98 -----  
 CTG10063 AAA-----AGCAATTTCAATCATTAACCTTAAAA----TTGCAGAAAA----TATCTTTAGA  
**Anchoisa** 2203 AAATATAAACAAATTTGAGAAAAAAGCAACTTCAATCATTAACCTTAAAA----TTGCAGAAAA----TTGCTTTAGA

CTG40749b -----  
 IES77 ATTAGGAAATTCGGTAAAACCTGCAA--TTTGGCA-GGATATTTAGGAATTTCTCTGGAAATAGCTAAGGATTATATA  
 CTG23427 -----  
 CTG35975 -----  
 CTG21499 ACTAGAAAAATTCGGTAAAACCTGCAA--TTTGGCA-GGATATTTAGGAATTTCTATTGGAAGAATAATTTATTGAGAA  
 CTG40749 -----  
 IES128 ATCAGGAAATTTGTAAAACCTGCAA--TTTGGCAAGGATATTTAGGAATTTCTATTATGAGAGCTAAATATTTATAA  
 CTG28766 -----  
 IES98 -----  
 CTG10063 ATGAGGAAATTCGGTAAAACCTGCAA--TTTGGCA-GGATATTTAGGAATTTCTATTATGAGAGCTAAATATTTATAA  
**Anchoisa** 2275 ATTAGGAAATTCGGTAAAACCTGCAA--TTTGGCA-GGATATTTAGGAATTTCTATTGGAAGAGCTAAATATTTATAA

CTG40749b -----  
 IES77 ATGTATGTTTTACAGCAACCTAATATTTACAAAGACAATAACTTGCTTT----ATTGATGCATAACAATAATTTTGATT  
 CTG23427 -----  
 CTG35975 -----  
 CTG21499 AATGATGTT-TACA-CAACCTG--ATTTACAAGGACAATAACTTGCTTTTACATTTGATGCTTAACATAAATTTAGGA-T  
 CTG40749 -----  
 IES128 AAGTATGTT-TACAGCAAGCTG--ATTAACAAGACAATAACTTGCTTTTAAATTTGATGCATAACATAAAATGTGGATT  
 CTG28766 -----  
 IES98 -----  
 CTG10063 -----  
**Anchoisa** 2351 AAGTATGTTTTACAGCAACCTG--ATTTACAAGACAATAACTTGCTTTTAAATTTGATGCATAACATAAATTTGGATT

CTG40749b -----  
 IES77 T--AAATTCGTAGCTCAAGTAAATTTGCTCGCTTAGGCAGTGAAAAATAATCTATTAATAAATTTAGAGCAAAATTTTCA  
 CTG23427 -----  
 CTG35975 -----  
 CTG21499 TAAAAATTTGTATCTAAAGATAATGTTACTC--TTGAGCAGTGCAAAAATAATCTATTAAGAA-TTGTAGCAAAATTTTCA  
 CTG40749 -----  
 IES128 TAAAAATTTGTAGCTCAAGAAAATATTGCTCTTTTGGAGCAGTGCAAAAATAATCTATTAAGAAATTTATAGCAAAATTTTCA  
 CTG28766 -----  
 IES98 -----  
 CTG10063 -----  
**Anchoisa** 2429 TAAAAATTTGTAGCTCAAGAAAATGTTGCTCGCTTAGGCAGTGCAAAAATAATCTATTAAGAAATTTATAGCAAAATTTTCA

CTG40749b -----  
 IES77 TATTTGCAACTAGCTACCGCAG-TTCATTAATTTTTTTTAGTAGTTTAACTACTTTGGCTTTGTACCTATCGCTTATTTA  
 CTG23427 -----  
 CTG35975 -----  
 CTG21499 TATTTGCAAAATAGCAACAGCAGTTTCATTAATTTTTTAGATAATTTAACAGCTTTGGTTATATACATGTCGCTTATTTA  
 CTG40749 -----  
 IES128 TATTTGCAAAATAGCAACTGCAGTTTCATTAATTTTTTAAAGTAGTTTAAACAGCTTTGGTTCATATACCTATCGATTATTTT  
 CTG28766 -----  
 IES98 -----  
 CTG10063 -----  
**Anchoisa** 2509 TATTTGCAAAATAGCAACTGCAGTTTCATTAATTTTTTAAAGTAGTTTAAACAGCTTTGGTTATATACCTATCGCTTATTTA

CTG40749b -----  
 IES77 GTTGCCTTAATTTTAAATCTCAAAATTAATGTTCTTTAGACAGAGGTTTGAATTTGC-ATACAATTAGCTACTCTTTTA  
 CTG23427 -----  
 CTG35975 -----  
 CTG21499 GTTGCCTTAATTTTAAATCTCAAAATTAATGTTCTTTAGACAGAAGGTTTGAATTTGCAAAATAATTAGCTACTCTTTTA  
 CTG40749 -----  
 IES128 GTTGCCTTAA-TTTAAGTCTCAAACTAAATGTTCTTTAGACAGAAGGTTTGAATTTTGC-AAATAATTAGCTACTCTTTTA  
 CTG28766 -----  
 IES98 -----  
 CTG10063 -----  
**Anchoisa** 2589 GTTGCCTTAATTTTAAATCTCAAACTAAATGTTCTTTAGACAGAAGGTTTGAATTTGCAAAATAATTAGCTACTCTTTTA

CTG40749b -----  
 IES77 AATTCAAGATAAAAAATGTTTACATTAATGAGTGAGTTTGGAGACATTTATTAGTTGCAAGAGGTTGTTAAATAAAA  
 CTG23427 -----  
 CTG35975 -----  
 CTG21499 ATTC--AATTAATAAATTTGTTTACATTTAGTAGTGAG-TTTGGGAGATTTTAAAAATTGCAAAAGGTTAGTAAAAAAA  
 CTG40749 -----  
 IES128 AATTAAAAATAAAAAATTTGTTTACATTTGCTGAGTGCGCTTTTGGGAGAAATTTAAAAGTTGCAAGAGGTTGGTAAAAAAA  
 CTG28766 AATTCAAAAATAAAAAATTTGCTTACATTTGATAAGTGAGTTTGGCAGAAATTTA-AAGTTGCAAGAGGTTGGTAAAAAAT  
 IES98 -----  
 CTG10063 -----  
**Anchoisa** 2669 AATTCAAAAATAAAAAATTTGTTTACATTTAGTAGTGAGTTTGGGAGAAATTTAAAAGTTGCAAGAGGTTGGTAAAAAAA

CTG40749b -----TTGCAAATTAATCAAGCTCATCAAAAAATAAATGTGTTATTGGAGCTATACTTTGTGACGTGT  
IES77 GAACACTTTTCCATATTGCAAATTAATCAAGCTCATCAAAAAATAAATGTGTTATTGGAGCCATAGCTTTGTGACTGGT  
CTG23427 -----  
CTG35975 -----  
CTG21499 -AACACGTTTCCATAATTGCAAATTAATCAAGCTCATCAAAAAATAAATAATTATTGGAGCTATAGCTTTGTAAGGGT  
CTG40749 -----  
IES128 GGGCACTTT-CCATTTTGCAAATTAATCAAGCTCATC-AAAAATCAATAATTGTTATTGGAGCTATAGCTTTGTGACGGGT  
CTG28766 GA-CGCTTTTCCATATTGCAAATTAATCAAGCTCATC-AAAAATAAATTTGTTATAGAAGACTATAGCTTTGTATAGGT  
IES98 -----  
CTG10063 -----  
**Anchoisa** 2749 GAACACTTTTCCATATTGCAAATTAATCAAGCTCATCAAAAAATAAATGTGTTATTGGAGCTATAGCTTTGTGACGGGT

CTG40749b TTATATGCTTAT-AATGTGTATAGGAAATGTT-ATCAATAGGTTTTGGGAGAATTTTT-GAATGAACCTCTAAGGCTGCT  
IES77 TTATATGCTTACAAATGTTATATAGGAAATGTTTATCAATAGGTTTTAGAGAATTTTT-GAATGAACCTCTAAGGCTCCT  
CTG23427 -----  
CTG35975 -----  
CTG21499 TTATAGCTTAAAAATGTTATAGG-AATGTTAATCAATAGGATTTTGGAGAATAATTT-TAATGAACCTTTAAGGCTGCT  
CTG40749 -----  
IES128 TTAATACTTACAAATGTTATAGGAAATGTTAATCAATAGGTTTTGGGAGAATTTTTGAATGAACCTCTAA-GCTGCT  
CTG28766 TTATATGCTTGCAAATGTG-----AATTTAATCGATAGGTTTTGGGAGAATTTTT-GAATGAACCTCTAAAGCTGAT  
IES98 -----  
CTG10063 -----  
**Anchoisa** 2829 TTATATGCTTACAAATGTTATAGGAAATGTTAATCAATAGGTTTTGGGAGAATTTTT-GAATGAACCTCTAAGGCTGCT

CTG40749b TTAGCAGAATAGTGAAGAAAAATAATTTTGCT-GGTGCTGGACAATGTATTTATCCATCACACATTAAT-AAAAATTTGGAT  
IES77 TTAGCAGAATAGTGAAGAAAAATAATTTTCTTTGTCTCGGAAATGCATCTATCCATCGCATCTC---AAAAATTAATGAT  
CTG23427 -----  
CTG35975 -----  
CTG21499 TTAGCAGAATAGTGAAGAAAAATAATTTTGCTCGGTGCTGGACGATGCATCTATTCATCGCACATCGC-AAAAATTTGGAT  
CTG40749 -----  
IES128 TTAGCAGAATAGTGAAGAAAAATAATTTTGCTGGTGGTGGACGATGCATATATCCATCGCACATCAC-AAAAATTTGGAT  
CTG28766 TTAATGAGAATAGTGAAGAAAAATAATTTTACTTTTGTGCTGGACAATGCATCTATCCATCTTACATCACAAAAATTTGGAT  
IES98 -----  
CTG10063 -----  
**Anchoisa** 2908 TTAGCAGAATAGTGAAGAAAAATAATTTTGCTGGTGGTGGACGATGCATCTATCCATCGCACATCAC-AAAAATTTGGAT

CTG40749b TAATFGCTTATGTGAACCTATCTATTTCTCCACAAATATAGTCCCTGA-GCTTAATTCATTGAAA-GCTCTGGGGAGT-  
IES77 TAATFGCTTATATGAATTTATTTCTCCCACCATATAGTCCCTT-GCTTAATTCATTGAAAAGCTATGGGG-AGTA  
CTG23427 -----  
CTG35975 TAATFGCTTATGTGAACCTGTTATTTCTCCATCATATAGTCCCTAGGCTTAATTCATTAAAAAGCTATGGGG-AGTA  
CTG21499 -----  
CTG40749 TAATAGTCTTATGTGGACTATTTATTTTCCCACCATATAGTCCCTTA-GCTTAATTCATTGAAAAGCTATGGGG-AGTA  
IES128 TAATFGTATATGTGAACCTATTTCTCCCACCATATAGTCCCTTA-GATTAATTCATTGAAAAGTTATGGGG-AAAA  
CTG28766 -----  
IES98 -----  
CTG10063 -----  
**Anchoisa** 2987 TAATFGCTTATGTGAACCTATTTATTTCTCCCACCATATAGTCCCTTA-GCTTAATTCATTGAAAAGCTATGGGG-AGTA

CTG40749b -----ACATCGTAACAACATATTAAGAATTTCAACAACATTA-----  
IES77 GCAAAACAAAACTCTCCAAAATGACTTTCGCAACATCATTTTAAGAACTTCAACAATATTCATTTTGTGCTTAACTCAAT  
CTG23427 -----CAACTTTCATTAATTTCTTAAACCAAT  
CTG35975 -----  
CTG21499 AC-AAACAAAAGCTCTCCAAAATGCACCTTCAACAATAACATTTTAAGAATTTGCAAAATTCGTTTTGTTTAACTAAAT  
CTG40749 -----  
IES128 GCAAAACAAAAGCTCTCCAAAATGCACCTTCGCAACAACATTTTAAGAATTTCAACAATTCATTTTGTGCTTAACTCAAT  
CTG28766 GCAAAATAAAAGCTATCTAAAATACACTTCGCAACAACATTTTAAGAATTTCAACAATATGCATTTTGTGCTTAACTCAAT  
IES98 -----  
CTG10063 -----  
**Anchoisa** 3065 GCAAAACAAAAGCTCTCCAAAATGCACCTTCGCAACAACATTTTAAGAATTTCAACAATTCATTTTGTGCTTAACTCAAT

CTG40749b -----TACATAGGCAGCCTTTTTGAT  
IES77 TACAGCTAATTAAGTGCAAAATATTTGCACCTTAACTTGAATTTCTTGAAGCTTACTTACATAGACAGCAGTTTTGAT  
CTG23427 TGCAACAATTAAGTGCAAAATATTTCCACTTTTAGCTTGAATTTCTTGAAGCAATGCTTGCATAGACAAAAGTTTTGAT  
CTG35975 -----TA-ATCGACACAGTTTTTAT  
CTG21499 TACAGCTAATTAAGGGCAAAATATTTGCACCTTAACTTGAATTTCTTGAAGCTTGTCTTACATAGACAGCAG-TTTGAT  
CTG40749 -----  
IES128 TACAGCTAATTAAGTGCAAAATATTTGCACATTTAACTTGAATTTCTTGAAGCTTGTCTTGCATAGACAAATAGTTTTGAT  
CTG28766 TACAGCTAATTAAGTGCAAAATATTTGCATCTTAACTTGAATTTCCGAATGCTTGTCTTACGTAACAGCAGTTTTTAT  
IES98 -----  
CTG10063 -----  
**Anchoisa** 3145 TACAGCTAATTAAGTGCAAAATATTTGCACCTTAACTTGAATTTCTTGAAGCTTGTCTTACATAGACAGCAGTTTTGAT

CTG40749b TAATTATATTTTCATTTAAAACATAAGGTATTCAATGCAACAATTTACAATAAAAA-TCTCTCACTTTTGTATA--GT  
IES77 TAGTTATATTTTAAATTTGA  
CTG23427 GAATTATATTTTCATTTAAACATAAAATATTTCAATAAAAGCAATTAACAATAAAAA-TCTCTACACTTTTCTTATA-GC  
CTG35975 TAATTATATTTTCGTTTAAA  
CTG21499 GAATTATATTTTCATTTAAACATAAAACATTTCAATGCAAGCAATTAACAATAAAAAATCTTTACTCTTTTCTGTAAGGC  
CTG40749 -----  
IES128 TAATTATATTTTCATTTAA  
CTG28766 TAATTATATTTTCATTTA-----AAATATTTCAATGCAATTAACAATAAAAAATTTCCACTATTTTCTTTTC-GA  
IES98 -----  
CTG10063 -----  
**Anchoisa** 3225 TAATTATATTTTCATTTAAACATAAAATATTTCAATGCAAGCAATTAACAATAAAAAATTTCTACTCTTTTCTTATA-GC

CTG40749b GACCGTGTGCGAAAAGCAGACTTTCGTCAGCTATACTTAACTACTATCGAGCGGATAG---TAAGAG-AGAGTTTGAATCG  
 IES77 -----  
 CTG23427 GATCGTGTGCTAAAGCAGACTTTCGTCAGTTATACTTAACTATCGAGAGA-----GTTTCGAAT-G  
 CTG35975 -----  
 CTG21499 GACAATTGTGCAATAGCAGACTTTCGTCAGTTATACTTAACTATCGAGCAGATATTAATAAGAGCACAGTTTCGTATCG  
 CTG40749 -----  
 IES128 -----  
 CTG28766 AACAGAGTGCAAAAGCAGACTT-----GTCAAGACTTAACTATCGAGCAGATATTAATCAGAGTAGAGTTTCGAATCT  
 IES98 -----  
 CTG10063 -----  
**Anchoisa** 3304 GACAGTGTGCAAAAAGCAGACTTTCGTCAGTTATACTTAACTATCGAGCAGATATTAATAAGAGCAGAGTTTCGAATCG

CTG40749b GGGGACAGAAATGGGATC AAAACAATCGCTCCTTAACTTTCCAGCCTATTCTCAATACTATTAGACTCTGATTTAATTA  
 IES77 -----CTCCTTAACTTTCCAGCCTATTCTCAATACTATTAGACTCTAATTTAATTA  
 CTG23427 GGGGACAGGATGGGATTTAAAACACTCGCTCCTTAACTTTCCAGCCTATTCTCAATACTATTTAAGCTCTGATTTAATAT  
 CTG35975 -----  
 CTG21499 G-----GCCTATTCTCAATACTATTAGACTCTGTTTAAATTA  
 CTG40749 -----  
 IES128 -----GACCTTTCCAGCCTATTCTCAATACTATTAGACTTTGATTTAATTA  
 CTG28766 AGGTACAGGTGGGATCTACAACACTTGCTCCTTAACTTTCCAGCCTATTCTCAATACTATTAGACTCTGATTTAATTT  
 IES98 -----  
 CTG10063 -----  
**Anchoisa** 3384 GGGGACAGGATGGGATCTAAAACACTCGCTCCTTAACTTTCCAGCCTATTCTCAATACTATTAGACTCTGATTTAATTA

CTG40749b TATATTTTAAATTTATGATAAAATTAATTTCTGAGTTTGGTGTAACTCATTAAATTTTATACAACCATATATGATTTATA  
 IES77 TATATTTTAAATTT-CATAAAATTAATTTATGGTTTGGGGTAACTCATTAAATATTTGATCATTATATATAATTTATA  
 CTG23427 TATATTTTAAAGTT-TGATAAAATTAATA-ATGGGTTTGGGGTAACTCATTAAAT-----ATGTATAATTTAT-  
 CTG35975 -----  
 CTG21499 TATATTT-AAAATTT-TGATAAAATTAATTTATAGGTTTGGGGTAAATTTGATTGAATATATATAATTTATTTATAATTTATA  
 CTG40749 -----  
 IES128 TATATTTTAAATTT-TGATAAAATTAATTTATGGGTTTGGGGTAAATTCATTAAATATGATATAATTTATATAATTTATA  
 CTG28766 GACATTTTAAATTT-TGATAAAATTAATACTATGGGTTTGGGGTAAATTCATTAAATATTTATATAATTCATATATAATTTATA  
 IES98 -----  
 CTG10063 -----  
**Anchoisa** 3464 TATATTTTAAATTT-TGATAAAATTAATTTATGGGTTTGGGGTAAATTCATTAAATATTTATATAATTTATATAATTTATA

CTG40749b TTGTTATAAA-TTTATTTAATCCTGCAAAAGCAGAAAGTCAAATTTGATTTGATTATA  
 IES77 TTATTATAAA-TGTATATACTCCTGCAAAAGTCAGAAAGTC-----  
 CTG23427 -----  
 CTG35975 -----  
 CTG21499 TTATTTTAAATTTTATATAATCCTGCAATAAGCAGAAAGTCAAATTTGATTTGACTATA  
 CTG40749 -----  
 IES128 TTATTATAAA-TTTATATAATCCTGCAAAAGCAGAAAGTCAAATTTGATTTTACTATA  
 CTG28766 TTATTATAATTT-----  
 IES98 -----  
 CTG10063 -----  
**Anchoisa** 3543 TTATTATAAA-TTTATATAATCCTGCAAAAGCAGAAAGTCAAATTTGATTTGACTATA

**D** CTG36069 TATAGTC--TAAAAAATTCAGCCAAAGTTTACTTTGAGTTGTAGCTAA--TCAATTTTATTTTGCTA-T----AA-AC  
 IES85 TATAGTCA-AGAACAATTTAGCCCAACATTTACTTTGAGTT---ACAAAATTCATTTTATTTT-CTA-TGCAAAA-GC  
 IES57 TATAGTCGAAAAACAATTTAGCCCAACATTTACTTTTAGAT--TCAAAATTCAA-TTTATTTTGCTA-TTGCAAAAAGC  
 IES214 TATAGTCG-AAAACAATTTAGCCCAACAGTTACTTTGAGTT---GCAAAAATTCATTTTATTTTGCT-T-CACATAAA-GC  
 IES105 TATAGTCG-AAAACAATTTAGCCCAATTTACTTTGAGTT---GCAAAATTCATTTTATTTTGCT-TTGCTTAA-GC  
 IES47 TATAGTC--AAAAAATTTAGCCCAACATTTACTTTGAGTT---GCAAAATTTAATTTTATTT--CTAATTCGAAAA-GC  
 IES80 TATAGTCG-AAAACATTTTCAACCAACATTTACTTTGAGTT---CCAAAATTCATTTTATTTTGATA-TAACAAAA-AC  
 CTG4797 -----  
 IES77b TATAGTAG-AAAAAATTTAGCCCAACATTTACTTTGAGTT---GCAAAAGTCAATTTTATTTTGCTA-TTGCAAAA-AC  
 CTG826 -----  
 IES132 TATAGCCG-AAAA-AATTTAGCCCAACATTTACTTTGAGTT---GCAAAAATTCATTTTATTTTGCTA-TCTCAAAA-GC  
 CTG7743 -----  
 CTG43276 AACATTC-AAAAAATTTAGTCAACATTTACTTTGAGTT---GAAAATTTGGAATTTTATTTTACTA-TTGCAAAA-GC  
 IES42b TATAGTTG-AAAAAATTTAGCCCAAAATTTACTTTGAGAT--GAAAATTTGAATTTTATTTTGCTA-TGCAAAA-AC  
 IES35 TATAGTCG-AAAAAACTTGAGCCCAACATTTAATTTGGGT---CCAAAATTAATTTTAAATTTGTTA-TTGCAAAA-GG  
 IES104 TATAGTCG-AAATCAATTTAGCCCAACATTTACTTTGAGTT---GCAAAAATAC-----  
 IES76 -----  
 CTG13940 -----  
 IES42 TATAGTAG-AAAACAATTTAGGCAACATTTACTTTGAAAT---GCAAAAGTTCATTTTATTTTCTA-TTACTAAA-TC  
 CTG34100 -----  
 IES169 TATAGTCG-AAAACAATTTCTGCAACATTTGGTTTAAT---GCAAAAATTCATTTTAA-TCTGCTA-TCACAAAA-GT  
 IES103 TATAGTCG-AAAACAATTTAGCCCAACATTTACTTTGGGT---GCAAAAATTCATTTTATTTTGCTA-TTGCAAAA-GC  
 CTG2630 -----  
 CTG45590 TATAGTCG-AAAAAATTTAGCCCAACATTTACTTTGAAAT---GCAAAAATTCATTTTATTTTCTA-TGCAAAA-GC  
**AnchoisB** 1 TATAGTCG-AAAACAATTTAGCCCAACATTTACTTTGAGTT---GCAAAAATTCATTTTATTTTGCTA-TTGCAAAA-GC

CTG36069 AAAGT-ATAATTGAACCAA-GTTG--TTTA-----TGTTAAAAAAAT-----TATAATAATCTTTTATAA  
 IES85 CAAGT-AAAAGTATTAACCAA--TTGA-TTTATAA-GCA--TTTGAAAAAA--TTGTT--TAATGATTTTCTTATAA  
 IES57 TAAGT-AAA-----TTTGAAAGAAATTTAAT--TTATTTTCT-ATAA  
 IES214 TATGT---AAATTAACCAAAGTTTA-TTTA-----TTAAAGGT---TTTTG-TAGAAATTTTATTTAA  
 IES105 TAAFA-AGAAATTTGAACCAA-GTTTA-TTTAAAA-GCAAGTTTGAATAATC-----TTTTTAAATAATTTCTTTTAA  
 IES47 TAAGT-AAAATTGAACCAA-----  
 IES80 CAA-----TGAACCAAGGTTAA-TTTAAAA-GTAGATTTGAAGAAAATTTTTTTGTATAATAATTTTCTTTAA  
 CTG4797 -----  
 IES77b CAAGT-AAAAATTCACCAA-GTTTA--CTAAAA-GTAGTTTGAAGGAAA---TTTTTGATGCTAATTTTCTT-TAA  
 CTG826 -----  
 IES132 GAAGT-AAAA-TTGAACCC-GTTAA-TTTGAA-GCAGTTTGAAGGAA-----TATAGTCATTTTCTTATAA  
 CTG7743 -----  
 CTG43276 AAAGA-AAAAATGTCCAA-GTTTA-TTTAAAA-GCAGATTTGAAGGAAA---TTCTTAATCATAATCTTCTCATAA  
 IES42b CAAGT-AAAAATTCACCAA-GTTT-----GAAGGAAA---TTTTTGATAGTAAT-TTCTTATAA  
 IES35 CAAATAAAAAATTTGAACCAA-ATTTA-TTTAAAA-GCAGTTTGAAGAAC--ATCATTATAATATTTTTC-----A  
 IES104 -----  
 IES76 -----  
 CTG13940 -----  
 IES42 CAAGT-AAAAATTTGAACCAA-GTTAA-TTTAAAA-GCAGTTTGAAGGAAA---TTTTTGATAATAATTTTCTTATGA  
 CTG34100 -----  
 IES169 TAAGT-AAAAATTTGAACCAA-GTTTA-TCTAAAA-GCAGTTT-AAGGAAA---TTTTTGATAATAATTTTCTTATAA  
 IES103 CCAGT-AAAAATCCACCAA-GTTTAAATTTAAAAAGCAGTTTGAAGGAAA---TTTTTGATAATAATCTTTATTATAA  
 CTG2630 -----  
 CTG45590 CAAAT-ATAAT-----  
**AnchoisB** 75 CAAGT-AAAAATTTGAACCAA-GTTTA-TTTAAAA-GCAGTTTGAAGGAAA---TTTTTGATAATAATTTTCTTATAA

CTG36069 ATAAATTAACCTCTAAATTTTTTGTTCGCTATTATAT--TTGCAATA-T--AATTAATTTGCGCATATATAATA--  
 IES85 ATATTTTAAATTTCTAATA-TTTTTTACACTTTT-TATCTATTGCTAATGGT--AGTATAT-TTGATCATATGATA--  
 IES57 ATAAATTAACCTCAAGCTTTTT-ATGGAATATT-TATAAA--GCTTGTAT--AATATATATGAATTATATAAACAT  
 IES214 T--ATTTCAAAACAGCATATTTTAGCTTTTT-TATATATTGCTTCTGTT--AGTAT-----  
 IES105 ATAAATTAACCTAGTATTTTTTGTGCACTTTTACATTTTCTTGTAAAT-----  
 IES47 TGAATTAATTAATATATTT-----  
 IES80 TTATTTTATCTTCTCGTATTTTTTGTGCACTTTAATATATATTACTAATAAT--AATATAATTTACATTATATGATAT  
 CTG4797 -----  
 IES77b TTAATTTAACTCCTTGTATTTTTTGTGCTCCTTAATATATATTGCT-ATTAT--AATATATGTTGCATGATATATATAT  
 CTG826 -----  
 IES132 ATAAATTAACCTTTAGTATTTTTTGTGCACTTTTTTAT-TATTGCTTAGAACAAAATATATTTTGCATTATCTGATATAT  
 CTG7743 -----  
 CTG43276 TTAATTTA---CTAATATACTTTGTGCACTTTTATCTATAACTTTAGT--AATTTAGTTTTCATTATATATATACAT  
 IES42b TAAATTTGACTTCTGTATTTTTTGTGCACTTTTAA-----ATATATTTTGCATATTTATGATATAG  
 IES35 ATAAATTTA-----TTAC-----TATAATGC-----GAT-----  
 IES104 -----  
 IES76 -----  
 CTG13940 -----  
 IES42 TTAATTTAATTTCTAATATTTTTTGTGCACTTAAATCCATATTGTTTATAAT--AATATATTTTCTATTAT-TGATATAT  
 CTG34100 -----  
 IES169 TTAATTTAACTTTAATATTTTTTGTGCACTTTTATCTATATTGCTTATAAT--AATATATTTTGCATTATA-----  
 IES103 TTAATTTAACTTCTAATA--TTTCCGCACTTTTACCTGTGTTGCAATAAT--AATATATTTTGCATGATAAGGATAT  
 CTG2630 -----TAACTTCTAATA-TTTTTTGTGCACTTTTAA-----ATAATATTTTGCATTAATGAAATAT  
 CTG45590 -----ACTTCTATCA-TTTTTTGTGCACTTTTATATATTGCTTATAAT--ACTATATTTTGCATTATATGATATAT  
**AnchoisB** 147 TTAATTTAACTTCTAATATTTTTTGTGCACTTTTATATATATTGCTTATAAT--AATATATTTTGCATTATATGATATAT

CTG36069 AAAACA--GTAATGCAATTATACAGCTAC--AAATATCATTTCAGGATATTT--ATTAATTTAAATCATGTAGTCTA--TTT  
 IES85 -AAGCAAACTAAAGCAATTTTATGTCAGC- AAATTTTTTTCAGGATCTTAAATT-----ATTATGTATGTCTA-TTTT  
 IES57 T-----AAGTAACGCAATTTAATCTTAGC- AAATTTTTTTCACATAATTC-TTAATTTATAGTATGTATGTCAATTTTT  
 IES214 -----TTTTGTGGACAATCTTC  
 IES105 -----ATTATTTTTATAATTTAAATTTGTATGTCTATTTTT  
 IES47 -----GATATTTTTGT  
 IES80 AAAGCAAA-CATCTCAATTT-ATTGCAGC-AAA-TTTTTTCAGGATATTT-ATTATTTTAAATTTATGTCTGCTATTTTT  
 CTG4797  
 IES77b AAAGCA-TGTAACTCATTTTATCGCAGC-AA---TTTTTCAGGATATTTTATAATTTAAATTTAT---ATTATTTTT  
 CTG826 AAAGTAAATGCAA-----TTTATAGCAGCAAATTTTTTTCAGGATATTTAATTAATTTAAATTTATGATGTCTA-GTTT  
 IES132 -AAACAAAGTAAAGAAATTTTATCAAT-AA-CTTTTTTCAGGAGATTTTCTTAATTTAAATTTATTTATATCTA-TTTT  
 CTG7743  
 CTG43276 TAAGCA-----ATTTTTAT  
 IES42b GAAACAAAGTAAACGGAATTTTATCAAGC-AAA--TTTTCTCAACATATTTTA-TAAATTTAAATTTATGTATGTCTATTTTT  
 IES35 -----GGATATTTTTATTATTTTA-ATTATTTAGATCTA-----  
 IES104 -----  
 IES76 -----  
 CTG13940 -----  
 IES42 AATGCAAA-----AGTATTTTTGGTAATTGAAA-----  
 CTG34100 -----  
 IES169 ---GCAAAGTAAAGCAATTTTTCAGCAGC- AAATCTTTTTTCAGGATATTTTATTAATTTAAATTTACGATGTGT-----  
 IES103 AAGGCAAAGTAAACGCAATTTTATCGCAGT- AAATTTTTTTCAGGATATTTTGTAAATTTAAATTTATGTATGTCT-----  
 CTG2630 AAAGTAAATGCAA-----TTTATAGCAGCAAATTTTTTTCAGGATATTTAATTAATTTAAATTTATGATGTCTATTTTT  
 CTG45590 CAACTCAAAGTAAACGCAATTTTATCGCAGC-ATATTTTTTTCAGGATATTTTATTAATTTAAATTTATGTATGTCTATTTTT  
**AnchoisB** 225 AAAGCAAAGTAAACGCAATTTTATCGCAGC- AAATTTTTTTCAGGATATTTTATTAATTTAAATTTATGTATGTCTATTTTT

CTG36069 CGATTTCA-TTATTATTTTC-AAAATGTTTT- AATATAACCTAAATAGCCATAGTT--TACCAATTTTTCC-AAAAAGC  
 IES85 TGTAATTC-TTA---TTTC-AAAATGCTGAAATATAACCCAACCTAGCCCATACT--TGCCAATAATACC-AAAATGT  
 IES57 TGT-GTCA-TTA---TTTTT-AAAATGCTGAAATAAATCAACTAGTCCATAATTTCTGCCAATTTTGGC-AGAAAT  
 IES214  
 IES105 TATTTACA-TT-----AACTAACCCCAATTT--T-ACAATATTGCC-AAAAAGA  
 IES47  
 IES80 T-TTTTCA-TTGTATTTTC--AATATGCTGAAATATTCCCAACCTAGCCCTTAACT--TGCCAATATTGCCAAAAAAT  
 CTG4797  
 IES77b TTTTTTCT-TTGTATTTTC-AAAG-----CAACCAACCCATAACT--TG-CAATATTGCC-AGAAAT  
 CTG826 TGTTTTCA-TTTTTATTTTC--AAATGCTCAAAATATAATCCAAATAGCCCATAACT--TTCCAATA-----  
 IES132 CGTTTTCA-TTATTATTTTC-AAAATGCTCTAAATATAAATAAATAGCCCTTAACT--TGGTGTATTGCC-AGAAAGT  
 CTG7743  
 CTG43276  
 IES42b TTTTTCAATTGTTATTTTC-AAAATGCTGAAATATTCCTACTAGCCCATAACT--TGCCAATATTGCC-AGAAAT  
 IES35 -----TGCCAATATTGCC-AGAAAGT  
 IES104 -----  
 IES76 -----  
 CTG13940 -----  
 IES42 -----  
 CTG34100 -----  
 IES169 ----TTCA-TTGTATTTTC-AAAATGCTGAAATATTCCCAACCTAGCCCATAACT--TTTCAAATTGCC-AGAAAT  
 IES103  
 CTG2630 TGGTTTTCA-TTATTATTTTCAAAAATGCCGAAATACTCCCAACCTAGCCCATAACT--TGCCAATATTGCC-GGAAAGT  
 CTG45590 TGGTTTTCA-TTGTATTTTC-AAAATGCTGAAATATC-CCAACTAGCCCATAACT--TGCCAATATTGCC-AAAAAGT  
**AnchoisB** 304 TGGTTTTCA-TTGTATTTTC-AAAATGCTGAAATATAACCCAACCTAGCCCATAACT--TGCCAATATTGCC-AGAAAGT

CTG36069 ACTGTTTGAATAATTGAACATTAAGG-CTCATCGTTTTATTT-T-ATTAAAAG-TTAAAG---AAACATTTGGAA--  
 IES85 ATCGTTTTGATGATCAA--ATCAAGG-CCTATCGT-TTATTCTG-ATTGAAA- TTGAAG-----AAAATTTGGAA--  
 IES57 AATGTTTTGGTAATTGACATCAAGG-CCCATGTTTTTTTTTT-ATTAAA-AA-TTGAAA---ATAAATTTGGAA--  
 IES214 -----ATATGGAA--  
 IES105 ATTGTTTGGGTAATTGAACATCAAGG-CCCATCGTTTAAATTTGT-ATTGAATA-TTGAAG---AAGAAATTTGGAA--  
 IES47 -----  
 IES80 ATTGTTTGGGTAATTGAACATCAAGG-CCCATCGTTTTATTTGT-A-----  
 CTG4797  
 IES77b ATTTTTC--ATAATTGAACATCGAGA-CCCATCTTTTTATATGT-ATTGAATACTTGAAGTTTTTAAAATTTGAAATG  
 CTG826 -----CATCA-----TTTATAT--ATTGAAA- TTGGG---AAAATTTGGAA--  
 IES132 ATTGTTTTGGTAATTGAACATCAAGG-CCCATCGTTTAAATTTGT-ATTGAATA-TTGAAG---AAAATTTGGTA--  
 CTG7743 -----  
 CTG43276  
 IES42b ATTGTTTGGGTAATTGAACATCAAGG-CCCATCGTTTTATTTCTG-ATTGAACAT-TTGAAG---AAAATTTGGAA--  
 IES35 ATTGTTTGGGTAATTGAACATCAAGG-CCCATCGTTTTATTTGT-ATTGAATA-TTGAAG---AAAAA-TTGGAA--  
 IES104 -----  
 IES76 -----  
 CTG13940 -----  
 IES42 -----ATCAAGG-CCGATT-TTTTATTTGT-GTTGAATGA-TTGAGG---AAAAAATTGGAA--  
 CTG34100 -----  
 IES169 ATTGTTTGGGTAATTGAACATCAAGG-ACGATCGT-----GTTGAACATA-TTGAGA---AAATATTTAGAA--  
 IES103  
 CTG2630 ATTGTTTGGGTAATTGAACATCAAGG-CCCATCGTTTTATTTAT-GTTGAACATA-TTGAGA---AAAATTTGGAA--  
 CTG45590 ATTAATTTGGATAAATTGAATTAAGG-CCCATCTTTGTTATTTGTAATTGAACATA-TTGAGG---TAAAATTTGGAA--  
**AnchoisB** 379 ATTGTTTGGGTAATTGAACATCAAGG-CCCATCGTTTTATTTGT-ATTGAACATA-TTGAGG---AAAATTTGGAA--



CTG36069 -----TTATAATTATAGTTTGGCTAAGAA---AAACCAACATAGAGAACA-AAAAATTATF-AGAAAATGT--TATAGC  
IES85 -----TTAGAAATATGGGTTGGCAAACGAA---AAATCAACACTGAAGAA-AAAATAGTTAATCTTAAAGATAT----GC  
IES57 -----TTAGAATTATAGATTGGCTAAGGAAACAA-----CAGGAGAACA-AAACAGTTTA-----  
IES214 -----TTAGAATTATAGATTGGCTAAGGAAACAA-----AAATCAACGCAAGAGACCA-AAAC-GTTTACAGATAA-GCATTTTAGC  
IES105 -----TTAGAATTATAGTTTGGGTAAGGAAATAAATCAACGAAGGACAACA-AAAAAGTTTATCAAAAAAGTATTGGAAC  
IES47 -----TTAGAATTATAGTTTGGGTAAGGAAATAAATCAACGAAGGACAACA-AAAAAGTTTATCAAAAAAGTATTGGAAC  
IES80 -----TTAGAATTATAGTTTGGGTAAGGAAATAAATCAACGAAGGACAACA-AAAAAGTTTATCAAAAAAGTATTGGAAC  
CTG4797 -----TTAGAATTATAGTTTGGGTAAGGAAATAAATCAACGAAGGACAACA-AAAAAGTTTATCAAAAAAGTATTGGAAC  
IES77b GTTTTTGAATATTTTGGGTAAGGATA--CAT-AAA-----GAACAATAAAAGTTTATAGAAAAAGTATTGC-GC  
CTG826 A-----TTAAATTTATAGGTCGGCTAAGGAAA-AAATCAACGCAAGAGAACCA-ATAAAGTTTATAGAAAAAGTATTGTATC  
IES132 -----TTAGAATT---GGTTAACTACGAGAAA-AAATCAAAGCTGGAGAACA-AAAAA-TTTATAGAAAA-ATATTTTTCG  
CTG7743 -----TTAGAATTATAGTTTGGGTAAGGAAA-AAATCAACGCAAGAGAACCA-ATAAAGTTTATAGAAAAAGTATTGTAGC  
CTG43276 -----TTAGAATTATAGTTTGGGTAAGGAAA-AAATCAACGCAAGAGAACCA-ATAAAGTTTATAGAAAAAGTATTGTAGC  
IES42b -----TTAGAATTATAGTTTGGGTAAGGAAA-AAATCAACGCAAGAGAACCA-ATAAAGTTTATAGAAAAAGTATTGTAGC  
IES35 -----TTA-AATTATAGTTTGGCTAAGGAAA-AAATCAACTTAGAAGAACA-ACAAAGTTTATAGAAAAAGTATTGTAGC  
IES104 -----TTAGAATTATAGTTTGGGTAAGGAAA-AAATCAACGCAAGAGAACCA-ATAAAGTTTATAGAAAAAGTATTGTAGC  
IES76 -----TTAGAATTATAGTTTGGGTAAGGAAA-AAATCAACGCAAGAGAACCA-ATAAAGTTTATAGAAAAAGTATTGTAGC  
CTG13940 -----TTAGAATTATAGTTTGGGTAAGGAAA-AAATCAACGCAAGAGAACCA-ATAAAGTTTATAGAAAAAGTATTGTAGC  
IES42 -----TTAGAATTATAGTTTGGGTAAGGAAA-AAATCAACGCAAGAGAACCA-ATAAAGTTTATAGAAAAAGTATTGTAGC  
CTG34100 -----TTAGAATTATAGTTTGGGTAAGGAAA-AAATCAACGCAAGAGAACCA-ATAAAGTTTATAGAAAAAGTATTGTAGC  
IES169 -----TTAGAATTATAGTTTGGGTAAGGAAA-AAATCAACGCAAGAGAACCA-ATAAAGTTTATAGAAAAAGTATTGTAGC  
IES103 -----TTAGAATTATAGTTTGGGTAAGGAAA-AAATCAACGCAAGAGAACCA-ATAAAGTTTATAGAAAAAGTATTGTAGC  
CTG2630 -----TTAGAATTATAGTTTGGGTAAGGAAA-AAATCAACGCAAGAGAACCA-ATAAAGTTTATAGAAAAAGTATTGTAGC  
CTG45590 -----TTAGAATTATAGTTTGGGTAAGGAAA-AAATCAACGCAAGAGAACCA-ATAAAGTTTATAGAAAAAGTATTGTAGC  
**AnchoisB** 449 -----TTAGAATTATAGTTTGGGTAAGGAAA-AAATCAACGCAAGAGAACCA-ATAAAGTTTATAGAAAAAGTATTGTAGC

CTG36069 CAGGTTT-AGCAAACA--AATTAATAAATAA-CATAAAGATA-TTAAGATAATAAACAAGGATCTAAATAATTTGATGGAA  
IES85 -----AAACTTCTTTTAAATGATACCAAACTCAA-TTCAGATCATAAGCAAAGAACCTAATGCTTAGATGAAA  
IES57 -----AAACTTCTTTTAAATGATACCAAACTCAA-TTCAGATCATAAGCAAAGAACCTAATGCTTAGATGAAA  
IES214 AAGGCTT-AGCAAATTTCTAATAAATGAATCTAGATTAAA-TTCAGATCATAAATAAAGGACCTAACATTCAGATG-AA  
IES105 AAGGTTA-A--CAACATCTAATAAATGAATCTAAAAGAAA-TTCAGTTTCATAAGGAAGGACCTAACACTTAGATGGAA  
IES47 -----AAACTTCTTTTAAATGATACCAAACTCAA-TTCAGATCATAAGCAAAGAACCTAATGCTTAGATGAAA  
IES80 -----AAACTTCTTTTAAATGATACCAAACTCAA-TTCAGATCATAAGCAAAGAACCTAATGCTTAGATGAAA  
CTG4797 -----AAACTTCTTTTAAATGATACCAAACTCAA-TTCAGATCATAAGCAAAGAACCTAATGCTTAGATGAAA  
IES77b AAGGTTT-TAGCAAACCTTCTAATAAATAAATAAAGAAA-AAA-TTAAGATATAAGCAAAGGAACTAATACTTAGATAAAA  
CTG826 AAGT-TTA-ACCAACCTT-----GGATCTAAAAGAAA-TTCAGATCATAAGCAAAGGACCTAATTTAATAATGAAA  
IES132 AAGGTTT-AGCAAACCTTCTAATAAATGAATCTAAAAGAAA-TTCAGATCATAAGCAAAGGACCTAACAGGAAGATG-AA  
CTG7743 -----AAACTTCTTTTAAATGATACCAAACTCAA-TTCAGATCATAAGCAAAGAACCTAATGCTTAGATGAAA  
CTG43276 -----AAACTTCTTTTAAATGATACCAAACTCAA-TTCAGATCATAAGCAAAGAACCTAATGCTTAGATGAAA  
IES42b AAGGTTT-AAACAAATTTCCATT-TAATGAATCTAAAAGAAAT-TTCAGATCATAAGCAAAGGACCGAACCTTAAATG--AA  
IES35 AAGGTTT-AGCAAACCTTGCATAAATAAATAAAGAAA-TTCAGATCATAAGTACTGGACCAACACTTAAAT-----  
IES104 -----AAACTTCTTTTAAATGATACCAAACTCAA-TTCAGATCATAAGCAAAGAACCTAATGCTTAGATGAAA  
IES76 -----AAACTTCTTTTAAATGATACCAAACTCAA-TTCAGATCATAAGCAAAGAACCTAATGCTTAGATGAAA  
CTG13940 -----AAACTTCTTTTAAATGATACCAAACTCAA-TTCAGATCATAAGCAAAGAACCTAATGCTTAGATGAAA  
IES42 AAGGCTT-GGATGACTTCCAATAAATAAATAAAGAAA-TTCAGATCATAAGCAAAGGACCTAACACTTATATG-AA  
CTG34100 -----AAACTTCTTTTAAATGATACCAAACTCAA-TTCAGATCATAAGCAAAGAACCTAATGCTTAGATGAAA  
IES169 AAGGTTT-AGCCATTTTCTAATAAATAAATAAAGAAA-TTCAGATATAAGCAAAGGACCTAATACTTAGATG--AA  
IES103 -----AAACTTCTTTTAAATGATACCAAACTCAA-TTCAGATCATAAGCAAAGAACCTAATGCTTAGATGAAA  
CTG2630 AAGGTTT-AGCCAACCTTCAATAAATAAATAAAGAAA-TTCAGATCATAAGCAAAGGACCAAACTTAGATGAAA  
CTG45590 AAGGTGT-AGC-AACTTCCAAT-AAATGAACCTAAAAGAAA-TTCAGATCATAAGCAAAGG-TCTAACACATAGATG-AA  
**AnchoisB** 522 AAGGTTT-AGCAAACCTTCCAATAAATAAATAAAGAAA-TTCAGATCATAAGCAAAGGACCTAACACTTAGATGAAA

CTG36069 AAAAGAGCTGAAGATATTTTGTAGCAATAGCAATTTAAA-TTTCAGAAA--TAGCAAAGCTGGAAATAAATAAACA  
IES85 AAAATGCTAAAGACAATATTTATCAATAGCAATTTAAA-TTTCAGAAA--TTAGCAAACAGCAG-----  
IES57 AAAATGTTATAGATAATATATGGTCTATAGCAATTTAAA-TT-CATAAA--CTGCAACAGCAGTAAAGAAAATCAATA  
IES214 AGAATATTAAGCCAAATCTTAAACAATAGCAATAAATAA-TTTCAGAAA--CTAGCCATTTGCAGGAAATAAATAAACA  
IES105 AAAATGCTAGAGTTAATATTTCAAATAAGCAA-----CAGCAGGAAATAAATAAACA  
IES47 -----AAACTTCTTTTAAATGATACCAAACTCAA-TTCAGATCATAAGCAAAGAACCTAATGCTTAGATGAAA  
IES80 -----AAACTTCTTTTAAATGATACCAAACTCAA-TTCAGATCATAAGCAAAGAACCTAATGCTTAGATGAAA  
CTG4797 -----AAACTTCTTTTAAATGATACCAAACTCAA-TTCAGATCATAAGCAAAGAACCTAATGCTTAGATGAAA  
IES77b AAAATGCTAAATAAACAATTTCTGCTAAGCAAT--AAAA-TTTTAGAAGA-----GTAGGAAATAAATAAACA  
CTG826 AAAATGCTAAAGACAATTTATTTAGCAAAGAAATTAAGA-TTTC-AAAA--CTATCAGCAGCAGGAAATAA-----CA  
IES132 AAAAAGTAAAGACAACATTTAT-----AAACTTCTTTTAAATGATACCAAACTCAA-TTCAGATCATAAGCAAAGAACCTAATGCTTAGATGAAA  
CTG7743 -----AAACTTCTTTTAAATGATACCAAACTCAA-TTCAGATCATAAGCAAAGAACCTAATGCTTAGATGAAA  
CTG43276 -----AAACTTCTTTTAAATGATACCAAACTCAA-TTCAGATCATAAGCAAAGAACCTAATGCTTAGATGAAA  
IES42b AACATGTTT-TAGACAATATTTAGCAATAGCAAAA-----TTTCAGAAAAGCCTAGCAACAGCAGGAAATAAATAAAGCA  
IES35 ATAATTTCTTAAGACAATATTTTGGCAATAGCAATTTAAAATTTCAATAA--CTAGCATCAGCAGAAATAAATAAATA  
IES104 -----GCAATAGCAATTTAAAATAA-TTTTAGAAGA--CGAACCAATAGCAGGTAATAA--TAACA  
IES76 -----GCAATAGCAATTTAAAATAA-TTTTAGAAGA--CGAACCAATAGCAGGTAATAA--TAACA  
CTG13940 -----GCAATAGCAATTTAAAATAA-TTTTAGAAGA--CGAACCAATAGCAGGTAATAA--TAACA  
IES42 -----GCAATAGCAATTTAAAATAA-TTTTAGAAGA--CGAACCAATAGCAGGTAATAA--TAACA  
CTG34100 -----GCAATAGCAATTTAAAATAA-TTTTAGAAGA--CGAACCAATAGCAGGTAATAA--TAACA  
IES169 -----GCAATAGCAATTTAAAATAA-TTTTAGAAGA--CGAACCAATAGCAGGTAATAA--TAACA  
IES103 -----GCAATAGCAATTTAAAATAA-TTTTAGAAGA--CGAACCAATAGCAGGTAATAA--TAACA  
CTG2630 AAATGCTAAAGACAATTTTGTAGCAATAGCAA-----TTTCAGAAAAGCCTAGCAACAGCAGGAAATAAATAAACA  
CTG45590 AAAATGCTAAAGACAATTTTGTAGCAATAGCAATTTAAA-TTTCAG-AAA--CTATCAACAGCAGGAAATAAATAAACA  
**AnchoisB** 600 AAAATGCTAAAGACAATTTTGTAGCAATAGCAATTTAAA-TTTCAGAAA--CTAGCAACAGCAGGAAATAAATAAACA

CTG36069 GAA**TAA**-TA**AGAT**-AAGAAATAGTA**TCAG**AAAAAATCAAGAT-TTAGAG**TAGAA**TAA**GTAT**TTTGAAGAAAGTTAAG  
 IES85  
 IES57 C-GAG**AATAAG**CTGAAGAAATAGTA**TCAG**AAAA**TAA**T**TAAGGT**-ATAGAGCAG---AA-ATTAT**GT**TGAAGAA**GGTTAAG**  
 IES214 G-AAAA**AAAG**CTG-----T**GGTA****TC**---AAAAATCAA**AA**T-AT**CGAA****CAT**---CATATTA-TTTGAAGAAAGTTAAG  
 IES105 G---AAAA**TAA**CAGAAAGAAATAGTA**TTTG**---AAAAATCAAGAT-GTAGAGCAG---AATATTA**ATTGAA**-AAAGTTAA**A**  
 IES47 -----  
 IES80 -----  
 CTG4797 -----  
 IES77b G-AAAGATAGGCTGAAGAAATAGTAGCAGAAAA-----  
 CTG826 G-AAAA**ATAAG**CTGT**ACAA**GTAGTA**TC**---AAAGATCAAG**C**-GTAGAGCAG---AACATTATTTTGAAGAA**TTT**TAAG  
 IES132 -----GCAG---AATATTA-TTTGAAGAAAGTTAA**A**  
 CTG7743 -----  
 CTG43276 -----  
 IES42b G-AAAA-----GT**TGT**AGAAAAAAT**TAA**CAT-ATAGAA**CAG**---AACATTATTTTGAAGAA**GAT**TAAG  
 IES35 GAAAAATAG**ACTGA**GGAAATA**TTAG**CAGAAAA**TAA**TCAAGAT-GTAGAGCAG---AATATTTATTTGAAGAA**GAT**TAAG  
 IES104 -----G  
 IES76 G-AAAAATAGGCTGAAGAAATA**TTAG**CAGAAAAAATCAAGAA-GAA**AA**GCAT---AATATTTATTTGAAGAAAGTTAAG  
 CTG13940 -----  
 IES42 G-AAAAAT**CGA**CTGAAGAAATA**TTAA**CAGAAAAA-TCAAGAT**TGT**CGAGTAG---GATATTTATTTGAAGAA**GGTTAA**-  
 CTG34100 -----  
 IES169 -----  
 IES103 -----  
 CTG2630 -----  
 CTG45590 G-AAAAATAGGCTGAAGAAATAGTAGCAG---AAAAATCAAG**GT**-GTAGAGTAG---CGTATTTATTTT**TAAGAA**GGTTAAG  
**AnchoisB** 677 G-AAAAATAGGCTGAAGAAATAGTAGCAGAAAAAATCAAGAT-GTAGAGCAG---AATATTTATTTTGAAGAAAGTTAAG

CTG36069 AAATAGTT-CAGAAATGGAAATG-T-AAAA**TGA**ATTAAAGAA**TAG**TAA-GGGAACA-TGATGAATATCGACA--TTT  
 IES85  
 IES57 AGAATAGTT-GAGAAAT**AGA**GATGCT-AAAAATGCATTAAGAATTCATA**AGAGG**-CAAGGA-GGATATCGACA-TTTT  
 IES214 AGAATAGTT-GAGAAAT**TAA**TGCT**AAAA**AAAT**AC**ATTAAGAAT**TATTA**-GGGAACA-GGATGAAT**TT**CGACA-----  
 IES105 AGAATAGTT-GAGAAATGGAAATGCT-**AA**TATGCATTAAGAATTCATA**G**-TGGAAACA-GGATGA**TAT****GGTA**-TTTT  
 IES47 -----  
 IES80 -----  
 CTG4797 -----  
 IES77b -----  
 CTG826 AGAATAGTT-GAGAAATGGAAATGCT-AGAA**CT**GCATTAAG-ATTC**CAA**-GGGAACA-GGATGGA-----T**GT****C**  
 IES132 AGAA**AA**AGTT-GA**AA**ATGG-AA**TAT**T-AGAAATGCATTA**AA**AAATTCATTA-GGG**A**TA-G-----  
 CTG7743 -----  
 CTG43276 -----  
 IES42b AGAATAG**AT**-GAGAAATGGAAATGCT-AGAAATGCATTAAGAATTCATA**G**-GGAAACA-GGGTGTATATC**TACAT**TTTT  
 IES35 AGAATAGTT-GAGAA**AA**GAATGCT-AGAAATGCATTAAG**AT**T**ATA**AA-GGGAACA-TGATGGATA**AG**GACA-T**CTT**  
 IES104 AGAATAGTT-GAGAAATGGAAATGCT-AGAAAT**GT**A-TAAAGAAT**TC**GTAA-GGGAACA-TGATGGATATCGACA-TTTT  
 IES76 AGAATAGTT-GAGAAAT**AA**AAATGCT-AGAAATGCATTAAGAATTCATA**A**-GG-AACA-GGATGA**AT**ATCGACA-TTTT  
 CTG13940 -----  
 IES42 -**AA**ATAGTT**T**GAGAAATGGAAATGCT-AGAA**T**GCATTAAGAAT**TA**CAA-GGGAA**TA**-GGAAGGATAT**C**TACA-TTTT  
 CTG34100 -----  
 IES169 -----  
 IES103 -----  
 CTG2630 -----  
 CTG45590 AGAATAG**TA**-GAG**AT**ATGGAAAT**GA**T-AGAAATGCATTAAGAATTCATA**A**-GGGAACA-GGATGGAT**CT**CGACA-TTTT  
**AnchoisB** 752 AGAATAGTT-GAGAAATGGAAATGCT-AGAAATGCATTAAGAATTCATA**A**-GGGAACA-GGATGGATATCGACA-TTTT

CTG36069 GAGCAC**AA**T**CT**AAAGAT**TT**GTAT**T**GAAAGAGGAGAAAAA**T**---**ACTTTA**AGCAGAA**AG**-----AAAGAA---**GGTTGA**  
 IES85  
 IES57 GAG**TACC**ATAATAAGA-TTGTAACGAAGAGGAC**AAAA**-**TT**---TC**AGTGA**A-AGAGAAG-----AAAGAA---**TAGTAGC**  
 IES214 -----**TCAT**TATAAA-A-TTGTA**TG**GAAAGAGGAGAAAA**-C**---TC**ATTG**AGCA**AGA**AG-----**AAAAA**AGTTGC  
 IES105 GAGCAC**AA**CA**T**TAAGA-**TC**ATAACGAAGAGGAGAAAAA**TAACT**CTTT**AA**AGAGAGA**AGTAAT**AAAGAA**T**AGTT**AC**  
 IES47 -----  
 IES80 -----  
 CTG4797 -----  
 IES77b -----  
 CTG826 GAGCA**TCAT**CA**AA**AGA-TTGTAACGA**TGA**TTAG-AAAA**T**---TCTTT**TAG**CAGAGA**AG**-----AAAGAAAAAGTTGC  
 IES132 -----  
 CTG7743 -----  
 CTG43276 -----AGCAGAA**T**---**TT****CAGA**ATATA-----  
 IES42b GAGCACCATCATA**AGA**-TTGTA**CA**AAAGAGGAGAAAA**A**T---TCTTT**AA**CAGAGA**AG**-----AAAGAAAAAGTTGC  
 IES35 GAGCACCAT**TAG**AAAGA-TTGTA**AA**GAAGAGGAGAAAA**A**-T---TCTTT**GAG**TAGAGA**AG**-----AAAGAAAAAGTTGC  
 IES104 GAGCACCATCATA**AGA**-TTGTA**TG**GGAGGAGAAAA**GT**---TCTTT**GAG**CAGAGA**AG**-----AAAGAAAA**CA**-TTGC  
 IES76 GAGCA-----**GA**AGAGAAAA**A**T---TCTTT**GAG**CA-AGA**AG**-----  
 CTG13940 -----  
 IES42 GAGCACCATCATA**CGA**-TTGTAACGA**G**GAGGAG-AAAA**T**---TCTTT**GAG**GAGAGA**AG**-----AA**T**GAAAA**T**GT**TC**  
 CTG34100 -----  
 IES169 GAGCA**TAT**ATA**AGA**-TTGTAACGA**AA**AGGAGAGAA**A**T---TCTTT**GAT**AGAGA**AG**-----**GA**AGAAAAAG**TC**GC  
 IES103 -----  
 CTG2630 -----  
 CTG45590 GAGCACCATCAT**TA**AGA-TTGTA**AA**GAAGAGGAG---AA**A**T---T**TTT**TGAGCAGAGA**AG**-----AA**T**GAAAA**A**TTGC  
**AnchoisB** 827 GAGCACCATCATA**AGA**-TTGTAACGAAGAGGAGAAAA**A**T---TCTTT**GAG**CAGAGA**AG**-----AAAGAAAAAGTTGC

CTG36069 AGAATCATAGCAATAGCAAGTAGAAAAATGATACATATATATAGATTAAAT-TAAATAATATTT--GATCTTTTTGTTTT  
 IES85 -----AAATATAAC-----  
 IES57 A----CA--GCCATAGCAAATTGGAAAATGATGTATATATAGATATAAAAAT-TATGCAATTATTT--TATCTTTTTGTTTC  
 IES214 AGAATC---GTAATAGT---AGCATAATGAT-TAT-TATAAATAAAAAA-TAAATAATATTT--GATCTTCTT-TTT  
 IES105 AGAATCGTCACTA-TAGCAAGAAGAAAAATATATCTGTATATATATAAACAT-TATAATAATATTT--GATCATTTTTATTT  
 IES47 -----  
 IES80 -----  
 CTG4797 -----  
 IES77b -----AAATTAAGAT-----  
 CTG826 AGAATCATAGCAATAGCAAG-GGAAAAATGATATATATA--AACATAAAAAT-TATACTTTGATT--GATCTTTTTGTTTT  
 IES132 -----  
 CTG7743 -----  
 CTG43276 -----TTATAAATTATAAAAC-TAAAGATTATTT--GATCTTTTT-TTTA  
 IES42b TGAATCATAGAAAACAGCAAGAAAAAATCATGATATATTTATAAATAAAAA-T-TAGAGATTATTT--GATCTTTTATTTTT  
 IES35 AGACTCACAGCAATAGCAAGAAGAAATCATATATATTTATAAATAAAAAAT-TAGAGAATATTT--GATCGTTTTGTTT-  
 IES104 AGAATCATAGCAAAGCAAGAAGAAAAATGATATATATTTAAATAAAAAATGTTAGAGAATATTT--GATCTATTT-TTTT  
 IES76 -----AAAATGAATATATATAAATAAATAA-T-TAGAGAATGTTTTTGATCTTTTTGTTTT  
 CTG13940 -----  
 IES42 AAAATCATTGCAATAGCAAGTAGAAAAATGATATATATATAAATAAATAAAT-TAGTGAATATTT--GATCAATTTAAAAAA  
 CTG34100 -----  
 IES169 AGAATCCTAGCAGTAGCAAGTAGAAAAATGATATATATATAAATAAAGT-TAGAGAATATTT--GATTTTTTTT-TT--  
 IES103 -----  
 CTG2630 -----  
 CTG45590 AGAATCATAGCAGTAGCAGGAAGAAAAATG-----ATATAAATAAATAAAT-TAGAGAATATTT--GATCTTTTT-TTTT  
**AnchoisB** 898 AGAATCATAGCAATAGCAAGAAGAAAAATGATATATATATAAATAAATAAAT-TAGAGAATATTT--GATCTTTTTGTTTT

CTG36069 -TTATC-ATT-----AATAATTATCAATTTTCACTTT-AAAAAGCTGCGCGTTTATTAACTTCTTTTAAATTTCC  
 IES85 -----  
 IES57 -GTTTA-CG-----AATCTTTATTCATTTTCTTCTTT--AAATGAAAGCGC--TTATTAACTTCTTCTTAAA-TTCC  
 IES214 -GTTTTCAATTT--AATAATTATCAATTTG-CCTTCTTT-AAAAAGACTATGC--TCAT-AAAC-TCTTTTAAA-TGAC  
 IES105 TGAAC-ATT-----AATAATTATCA-----CTTT-AAAAATGATTGCTC--TTATTAAATTTCCACTCAA-TTCC  
 IES47 -----TCAATTT-CCTTCTTT-AAA---TGAC--TTATTGAACCTTCTTCTTTA-TTCC  
 IES80 -----  
 CTG4797 -----C--TTATTAACTTCTTCTTAAA-TTTC  
 IES77b -----  
 CTG826 -GTTTT-GTTTATTAATAATTCTTTAATTT-CCTTCTTT-AAAAAGACTGTGT--TTATTAAATATCTCTTAAA-----  
 IES132 -----  
 CTG7743 -----  
 CTG43276 -A-----ATT-----AATAATTATCAATTT-CTCCTTT--AAACGACTGCGC--TTATTAACTTCTTCTTT-----  
 IES42b -AT-----AATAATCAATTT-TTCTTT-AAAAAATGCGC--ATATTAAA--ATTCTTAAA-TTCA  
 IES35 -GTTT-ATT-----AATAATTATCAATTT-CCTTTT-AAAA-AACTGTGG--TTATTAAACATCTTCTTAAA-TTCC  
 IES104 -T-ATT-----ACTAATTATTTGATTT-CCTTCTTTAAAAACGAAATGCC--TTATTAACTTCTTCTTAAA-TTCC  
 IES76 -GTTTT-ATTAAATAAAATTTATCAATTT-CCTTCTTT-ACAACGACTGCC--TTATTAACTTCTTCTTAAA-TTCC  
 CTG13940 -----  
 IES42 -----AATAATTATCAATTT-CCTTCTTT-GAAATGACTGCGC--TTATTAACTTCTTATTAAA-TTCC  
 CTG34100 -----  
 IES169 -----AATAATTATCAATTT-ATTCTTT-AAAAAGACTGCGC--TTATTAACTTCTTTTAAA-CTCC  
 IES103 -----TCTTAAA-TTCC  
 CTG2630 -----  
 CTG45590 -----T-ATT-----AATAATTATTTAATTT-CCTTCTTT-GAAACGAACTGCGC--TTATTAACTTCTTCTTAAA-TTCC  
**AnchoisB** 975 -GTTTT-ATT-----AATAATTATCAATTT-CCTTCTTT-AAAAAGACTGCGC--TTATTAACTTCTTCTTAAA-TTCC

CTG36069 TTAATTTATTGTTCTAGCTCCTCGGTTAGCTTTGATAATTTAAGCAATTTTTT-TGCTTAAA--T--GACCTCTTTACA  
 IES85 -----  
 IES57 TTAATTTATTTGTTCAAACCTTCAATTACTTTTGACAATATATGCAATTTTTTTTGCATTAA--T--GAGCTCTTGCA  
 IES214 TTAGTTTATTAGTTATAACTAGTCAGCTAACTTTGATAATTTAAGTAGTTTTTTT--GCTTAAAT--T-----  
 IES105 TTAATTTATTTGT-----  
 IES47 -TAATTTATTTGTTCTAGCTCTTTAGTTAACTTAGATAATTTAGCATTCTT--GGTTAAA--T-----GCG  
 IES80 -----  
 CTG4797 -----  
 IES77b GTAA---TCATTCTAATCTATTAGATAACTTTGATAATTTAAGCAATGTTTT-TGCTTAAA--T--AAGCTCTTTGCG  
 CTG826 -----TTATTTCTTCTAATCTTCCGGTTAACTTTGATAATTTAAGCAATTTTTT-----  
 IES132 -----TATTTTATTTCTTCACTTAACTTTGATAATTTAAGTAAATTTTTT-TGCTTAAA--T--GAACTCTTACA  
 CTG7743 -----  
 CTG43276 -----TGATAATAAAGCAATTTTTA--GCTTAAA--T--AAGATCATTGCA  
 IES42b TTAATGTATTTATTTCTAATCTTTCAGTTAACTTTGATAATTTGCGCAATATTTT--GCATAAAAATAAAGTCTTTGCT  
 IES35 TTAATTTATTTAATTTCTAATCTTTCAGTTAACTTTAATAATTTAAACAAATTTTTT--GCTTAAA--T--AAGCTCTTTGC-  
 IES104 TTAATTTATTTATTTCTAATCTTTCAGTTAACTTTGATAATTTAA--AAATTAATTTTGTTTAAAT--T--AAGTCTTTACA  
 IES76 TTAATTTATTTATTTCTAATCTTTCAGTTAACTTTGATAATTTAAGCAACTATTT-TGTTTTAAA--T--AAGCTCTTTTCG  
 CTG13940 -----  
 IES42 TTAATTTATTTATTTAACCCTTTCAGTTAACTTAGATAATTTAGAGCAAATTTTT-TGCTTAAA--T--AAGCTCTTTGCG  
 CTG34100 -----  
 IES169 TTAA-TTATTTATTTCTAATCTTTCAGTTAAATTTGATAATTTAAGCAATTTTTT-TGCTTAAAG--T--AAGATCTTTGCTG  
 IES103 TTAATTTATTTATTTCTAATCTTTAGTTAACTTTGATAATTTAAGCAATCTTTCTTTTAAA--T--AAACT-----  
 CTG2630 -----TTAATAATTTAAG-----  
 CTG45590 TTAATTTATTTATTTCTAATCTTTCAGTTAACTTTGATAATTTAAGCAATTTTTT-TGCTTAAA--T--AAGCTCTTTGCG  
**AnchoisB** 1043 TTAATTTATTTATTTCTAATCTTTCAGTTAACTTTGATAATTTAAGCAATTTTTT-TGCTTAAA--T--AAGCTCTTTGCG

CTG36069 ----TGTTTTTTTTCG-TACATCT-----  
 IES85 -----  
 IES57 ATCCTCGATTTTCTTTGC-AGCATATTATTTAAATTTCTCAACTTGATCCTTCGTTCTGCAA-----  
 IES214 -----  
 IES105 -----  
 IES47 ---CT-CTTTGGCTTTGC-TGCATCTCATTTAAATTTCTCAAATTGCTCCTTCGTTCTGTGTAAACATCTCATCCATCC  
 IES80 -----  
 CTG4797 -----  
 IES77b AG-----C-TGCATCTTATTTAAATTTCTTAACTTGCTCCTTCCTTCTGCAATAATATCTCA---ACT-  
 CTG826 -----  
 IES132 AACCTGCTTTTTCCTTAA-TTCACCTTA--AAATTTCTAACTTGCTCCTTCGTTCTGCTGAAATATCTCA---TCT-  
 CTG7743 -----  
 CTG43276 AGCTTGCTTTTATTTCG-TACATCTTACTTAAATTTCTCAACTTTCTCCTTCATTCGGAGGAAATATCTCA---ACT-  
 IES42b AACCTGCTTTTTCCTTGCCTGTTCTAA-TTAAATTTCTCAACTTGCTCATTTATTCTGCAAAAATATCTCA---ACT-  
 IES35 -----TTAC---ACTTGCTCCTTCCTTCTGCGGAAATATCTCA---AAT-  
 IES104 AGTCTGCTTTTTCCTTGC-TGCATCTTATTTTAAATTTCTCAACATGCTCCTTCGTTCTGCGGTATTTATCTCA---ACT-  
 IES76 AGGCTGCTT-----TGGC-TGCATCTTATTTAAATTTCTCAACATGATCCTTCGTTTACAAAATATTTCA---ACTA  
 CTG13940 -----  
 IES42 AGCA-GGTTTTACTTAGC-TGCATCTTCTTAAA-TTCTCAACTCGCTTCTTCGTTCTTCGGAAATATCTCA---ACT-  
 CTG34100 -----  
 IES169 AGCCTGCTTTTTCCTTAC-TGCATCTTATTTAAATTTCTCAACTT-----CTCA---AC--  
 IES103 -----  
 CTG2630 -----  
 CTG45590 AGAC-GCTTTTTCGTTTC-TGCATCTTATTTAAATTTCTCAACATGCTCCTTCGTTCTGCGGAAATATCTCA---GCT-  
**AnchoisB** 1118 AGCCTGCTTTTTCCTTGC-TGCATCTTATTTAAATTTCTCAACTTGCTCCTTCGTTCTGCGGAAATATCTCA---ACT-

CTG36069 -----TAATTAAGAATGAACTTTTAAATTCAAAATACTTTCAACAG-ATCATCTTA  
 IES85 -----TCTTAATTGAAATAACTTTTCATTAG-ATAATTTTG  
 IES57 -----  
 IES214 -----  
 IES105 -----  
 IES47 TTTTGTTCCTCAGATAGATATATCTAATTAAGAAT-ATAT-TTTGAATTGAAATAGCTTTTATATTAG-ATCATCTTG  
 IES80 -----  
 CTG4797 -----  
 IES77b TTTTGTTCCTCCAATAATGTATCTAATTAACGAATCAAACTTTTTAATTGGAATAACTGTTACATTGG-ATTATCTTG  
 CTG826 -----  
 IES132 CTTTGTTCATCCAATAAATGGATCTAATTGACAATCAAAC-TTTTAATTGAAATAACTGTTACATTAGAAATATCTTG  
 CTG7743 -----  
 CTG43276 T-TAGTTTCTCCAATAGATGTATCTAATTAACGAATCAAAC-TTTTAATTGAAATAACTGTTATATTAG-AAATCTTG  
 IES42b TTTTGTTCCTAGAATAGATGTATCTAATTAAGAATCAAAC-TTTTAATTAAAATAACTGTTACATTAG-ATCATCTAG  
 IES35 TTTTGTTCCTCCAATAGATTTTCTAATTAATTAATCAAAC--TTTAATTGAAATAACTGTTATATTAG-ATCATATTG  
 IES104 TTTTGTTCCTCCAATAATTTATCTAATTAAGAATCAAAC-TTTTAATTGGAATAACTGTTATATTAG-ATCATCTTG  
 IES76 CTTTGTTCCTCCAATAGATGTATCTAATAAGGAATCAAAC-TTTTAATTGAAATAACTTTTACATTAG-ATCATCTTG  
 CTG13940 -----  
 IES42 ATTTGTTCCTACGATAGATATATCTAATTAACGAATCAAAC-TTTT-----AAATAACTGTTAGATTAG-ATCATCTTG  
 CTG34100 -----  
 IES169 TTTTGTTCCTCCAATGAATGTATCTAATTAACGAACCAAAC-TTTTAATTGAAATAAATTGTTAAATTG-ATCATCTTG  
 IES103 -----  
 CTG2630 -----  
 CTG45590 TTTTGTTCCTCCAATAGATGTATCTAATTAACGAATCAAAC-TTTTAATTAAAATAACTGTTACGTTAG-ATCATCTTG  
**AnchoisB** 1192 TTTTGTTCCTCCAATAGATGTATCTAATTAACGAATCAAAC--TTTAATTGAAATAACTGTTACATTAG-ATCATCTTG

CTG36069 TGTAA-ATTTGATTAATACTTCATTTT-GGGTCTTGAATAAAGAATGATTAGGATCTATCG-TTTAAGAATATTGACA  
 IES85 CGTAAGATTTTATTAATTTTGTGCAATTTGGTCTTGAATTAAGAATAAATTCGGGCTATTCG-TTTAAGAATATTGACT  
 IES57 -----  
 IES214 -----  
 IES105 -----  
 IES47 CGAATGA-TTGATGAATCTTGCAATTTTGTGTTCT-AGTAAAGAATAAATTCGGATCCATCA-TTTAAGATAATTGACT  
 IES80 -----  
 CTG4797 -----  
 IES77b CGTAAGATTTGATTAATCTTGCAATTTAGGTTTGTGAATAAAGAATGATTTCGGATCTATCG-TTTAAGAATATTGACT  
 CTG826 -----TGATTAATACTTACGCTTT-GGG-TTTGAATAAAGAATGATTTAAATCTATCGCTTTTATTTATATCGACT  
 IES132 GGAGAAATTTGATTAATCTTGCACTTT-TGGTCTCGAATAAAGAATAAATTTGGATCTATCG-TTTTAC-AATATTGACT  
 CTG7743 -----  
 CTG43276 CTTAAGATCTGATTTATCATAACATTTTGGTCTTGAATAAAGAATGATTGGATCTATCT-TTTAAGAATATTGACT  
 IES42b CTTAAGACTTGATTAATCTTGCACTTT-GGGTCTTGAATAAAGAAGGTTTGGATCTATTG-TTTAAGGATATTGACT  
 IES35 CATTAGATTAAGATTAATCTTGCGCTTTTGGTCTTGAATAAAGAATGATTGGATCTATCG-CTTTAAGAATATTGACT  
 IES104 TGAAGGTTTGAATTAATCTTGCAATTTTGTGATCTTGAATAAAGAATGATTTCGGATCTATCG-TTTAAGAATGTTGAT  
 IES76 TGTAATGATTTGATTAATCTTGCACTTG-AGGTTCTTGAATAAAGAATGATTGGATTTATCG-TTTAAGAAGATTAGT  
 CTG13940 -----  
 IES42 TGTAAGGTTTGAATTAATCATGCACTTGGGGTCTTGAATAAAGAATGATTTCGGATCTATCG-TTTAAGAATATTGAA  
 CTG34100 -----AATAAACAATGATTGGAAATATTG-TTTTAAATATTGACT  
 IES169 CGTAAGATTTGATTAAGCATGCACTTGGGGTCTTGAATAAAGAATGAATTCGGATCTACCG-TTTAAGAATTTTG---  
 IES103 -----  
 CTG2630 -----  
 CTG45590 ATTAAGA-TTGATTAATGATGCACTTGGGGTCTTGAATAAAGAATGATTTCGATCTATCG-TTTAAGAATATTG-CT  
**AnchoisB** 1269 CGTAAGATTTGATTAATCTTGCACTTT-GGGTCTTGAATAAAGAATGATTTCGGATCTATCG-TTTAAGAATATTGACT

CTG36069 G-A-CATTTATAATCATGGTGTTC-ATGGG-AAA-----TTTAAAT----  
IES85 GTC-CATGTTTTATCAGAGTATCTTCAATCAGCAAAGCCA-----AGCTCTAGCCATTTGTTTCTTTTAAATCTTG  
IES57 -----  
IES214 -----  
IES105 -----  
IES47 GCC-CAATATTTATCAGTGTAGTTCCATCAACAAA-ACCA-----A-CACTTTGCCATTTAGCTCCTTTTAAAGTCTCA  
IES80 -----  
CTG4797 -----  
IES77b ACC-CATATTTTATCAGAGTAGTTTCCATCACCATC-ACCATGGCCGAGCACTTAGCCAT-TAGTTTCAATAAAATCTCG  
CTG826 GGC-TATGTTTTATCAGGTAGTTTTCATCAGCAA-GCCA-----GCCTCTTAGACATATAGTTTCTTTTAAATCTGG  
IES132 GTT-CTTGTTTTATCAGGGTATCTTCCATGAGCAA-GCCA-----AGCTCTTAGCCATTTAGTTTCTTT-AAATCTCG  
CTG7743 -----  
CTG43276 GCC-CATGTTTTATCAGAGTAGTTTCCATCATCAAA-GCCA-----AGATCTTAGCCATTTAGTTTCTTTAAATCTCG  
IES42b GCC-AATGTTTTATCAGATTAGTTTCCATCA-CAA-GCCA-----AACTCTTAGCCATTTAGTTTCTTTAAATCTCG  
IES35 CCCTTTTGTTCTATCAGGGTAGTCTCCATCAGTAA-GCCA-----AGCTCTTAGCCATTTAGTTTCTTTCAATCTCG  
IES104 GCC-CATATTTTATCAGGGTATTTTCCATCACCAA-GCTA-----AGCTCTTAGCCATTTAGTATCTTTTAAATCTCTT  
IES76 GCC-AATGTTTTATCAGGGTAGTTTAAATGGCAA-GTCA-----AGCATTTAGCCATTTAATTTCTTTT-ATCTCTG  
CTG13940 -----  
IES42 ACC-CATGTTTTATCAGGATGGTTTCCATCACCAA-CCCA-----AG--CTTAGCTATTTAGTTTCTTTTAAATCTCG  
CTG34100 GCC-CATATTTTATCAGGGTAGTTTCCATCAGCAA-GCCA-----AGCTCTCACCATTTAGTTTAAAT-AAATCTTG  
IES169 -----  
IES103 -----  
CTG2630 -----  
CTG45590 GCC-CAAGTTTTGTCAGGGTGTGTTTCCATCACCAA-GCCA-----AGCTCTAAGCCATTTAGTTTCTTTTAAATCTAG  
AnchoisB 1347 GCC-CATGTTTTATCAGGGTAGTTTCCATCAGCAA-GCCA-----AGCTCTTAGCCATTTAGTTTCTTTTAAATCTCG

CTG36069 -----FACTTGATTCACACCTA AAAAATT  
IES85 TGTA AAA--TTTC-CTCTTTTGTGGTTGATCTTAGCAATATCTTATTTGACCTTTTTTTTTTATTCAAACCTAAACAATT  
IES57 -----  
IES214 -----TTATTTG AAC-TTTTTTTGATTC TAAGCTAAATATA  
IES105 -----TTTCTCTTTAATT-----  
IES47 TGTA AAA--TTAC-CACTTTAGTTGCTGATCTTAGCAGTTATCCTAATTGA-C-CTTTTTGATTC TAAGC-----  
IES80 -----  
CTG4797 -----  
IES77b TGTA AAA--CTTC-CTCTTTAGTTGCTGATCTTACCAATCTCCTATTTG AAC-TTTTTTTGATTC TAAGCGTTAGCATT  
CTG826 TGTA TAA--ATTTCTCTCTTAGTTGCTGATCTT-----ATTTGAGC-TTTCGTAG--TATTAGCTTAAGCATT  
IES132 TATAAAA--TATC-CTCTTTAGTTGCTAATCTTAGCAATATCATATTTG AAC--TTTTTTGATTC TAAGATAAAACTTA  
CTG7743 -----  
CTG43276 TGTA AAT--TTTC-CTCTTTAGTTGCTTATCTTAGCAATATCCTA-----TTTGATTC TAAGCTATAGCATT  
IES42b AGTAAAA--TTAC-CTCTTTAGTCTGATCTTAGCAATATCCTAATTG AAT-CTTTTTTGATT-----TAGAATT  
IES35 TGTA AAA--TTTC-CTCTTTAGTTGTTGATCTTAGCAATCACACTATTTG AAC--TTTTTTGATTC AAAGCTAAAGCATT  
IES104 GTTAAAAATTTTTCCTTTAATTTGTTGA ACTT-----  
IES76 TGTA AAA--TTTC-CTCTTTA TTTGCTGATCTTAGCAATATCCTATTTG AAC-TTTTTTTGATT TTAGCTAAAGCAA  
CTG13940 -----  
IES42 TGTA AAA--TTTACTCTTTAGTTTCTGATCTTAGCA TTTATCCTATTTT AAC-TATTTTTGATTC CAGCTATAGCATT  
CTG34100 TGTA AAA--TTTT-CTCTTTAGTCTGATCATAGCTATTATCCTATTTG AAC-TTTTTTTGATTC TAAGCTAAAGCATT  
IES169 TGTA AAA--TTTC-CTCTTTAGTTTATGAACTTAGCTATTATCC AATTG AAC-TTTTTTTGATTC TAAGCTATAGCATT  
IES103 TGTA --A--TTTC-CTTTATAATTTGCTGATCTTAGCAATATCC CATTGATC-TTTTTTTGATTC TAAGCTATAGCATT  
CTG2630 TGTA AAA--TTTT-CTCTTTTATTGCTGATCTTAGCAATATCCTATTTG AAC--TTTTTTGATTC TAAGCTATAACATT  
CTG45590 TGTA TAA--TTTC-CTCTTTAGTTGCTGATCTTAGCAATATCCTATTTT AAC-ATTTTTTTGATTC TAATCTATAGCATT  
AnchoisB 1419 TGTA AAA--TTTC-CTCTTTAGTTGCTGATCTTAGCAATATCCTATTTG AAC-TTTTTTTGATTC TAAGCTATAGCATT

CTG36069 TT--GAAGTAACT-----ATTA-TATGC--TGTTACATCTGATGAATGGATAAG-GGCAAGTAATATCTGCA AAG  
IES85 TATTTGTAGCAACTCTGAGCCGATATTACGC--TGTTACACTGAAGAATGGATCGCG-----ATATCCCGCTAAT  
IES57 -----  
IES214 TTTT-GTACAAACCCCGAGCAAAGTTACG-----  
IES105 -----  
IES47 -----  
IES80 -----  
CTG4797 -----  
IES77b TTTA-ATAGCAACTCGAGCAAATATTATTC--TGTTACACTGGAAGAATGAATCGCG-GGCAAATAATATCCCGCTAAG  
CTG826 TTTT-GTAGTAACCTCTGAGCAAATATTACACTTTTACACCTGAAGAATGGATCTCT-GGTATAAAATAT-CGACTAAA  
IES132 ATTTTGTAGCTACCCTAATAAATATTAACT--TGTTACACTGAAGAATGATCGCG-GGCAAATAATATCCCGCTAAG  
CTG7743 -----  
CTG43276 TTTT-GTAGCAAACCTGAGCAGATATTATGC--TGCTACACCTAAGAATGGATCTC--AACAAATAATATCCCGCTTAG  
IES42b TATTT-TAGTAACCTCTGACAA-TGTTATGTC--TGTTACTCATGAAGAATGGATCGCG-GACGATAA-----  
IES35 GTT--GTTGCAACTCTGAGCAAATCTTACT--TGTTACACTGAAGAAGGGATCGAG-GGAAAATAATATCCGCTAAG  
IES104 TTTT-GTCTGCTGAGCAAATATTAAAGC--TGTTACACCTGAAGAATGGATGTA-GGCAAATAATGTA CTGCTAAG  
IES76 -----  
CTG13940 -----  
IES42 TTTT-GTAGTAACTCTGAGCAA-TAGTAAGC--TGTTACA ACTGAAGAATGGATGCG-GGCAAGTA-----CTTAG  
CTG34100 TTGTTGTAA AACTCTGAGCAAAGTAGTTCGC--TGTTAATCTGAAGAATGGATCGCGAGGCAAAATATTATCTACTAAG  
IES169 TTTT-GTAA-AACTCTGAGCAAATATTAAAGC--TGTTCCACCTGAAGAAGGGATCGCG--TGCAAATAATATCCACTAAG  
IES103 TTTTATAGCAAATCTGAGCAAATATTACGC--TGTTACACTGAAGAATGGATCGCG-GGCAAATAATAT-----  
CTG2630 TTTT-GTCGCAACTCTGAGCAAAGTAGTTCGC--TTTACACTTAAGAATGGATCAAG-GGCAAATAACATCCCGTTAAG  
CTG45590 TTTT-TAGCAACTCTGAGCAAATATTACGC--TGTTATATCTGAAGAATGAATCGCG-GGCAAATAATATCCCGCTAAG  
AnchoisB 1495 TTTTGTAGCAACTCTGAGCAAATATTACGC--TGTTACACTGAAGAATGGATCGCG-GGCAAATAATATCCCGCTAAG



CTG36069 -----  
 IES85 TTC-----ATT**TTTG**-CTTTTAAAGTATAAAAT-ATA**CTTAC**-----ATTTTATTGG**ACAT**TATTTCTAA**TTTCA**-----TT  
 IES57 -----  
 IES214 -----AATT-ATAACTAT**C**-----ATTTTATTGG**A**-----TTTTTAAAT**TTA**AGATTT  
 IES105 TTA-----ATTATTATTTTT**CAAT**TCAA--G-ATAAC-AG**TTAT**ATTATTATTGG**A**--TCATTTTAAAT**TTCA**AGAT**CG**  
 IES47 TTA**A**--ATTATTATTTTT**GTAA**-TATAAAT**TCATA**ACT**TAC**-----ATTTT**CCAT**TCAA-----  
 IES80 -----  
 CTG4797 -----  
 IES77b -----  
 CTG826 -----GTTT**TTATTGTA**--TTATTTTAAAT**TTCA**AGA--TT  
 IES132 TTA-----ATT-**TT**-TTTTTAAATATAAAAT-ATA**ATTAA**C-----AT**TCAT**TATTGG**A**--TTAT-GTTAAAT**TTCA**AGATTT  
 CTG7743 -----  
 CTG43276 TCA-----ATTAG**TG**-CTTTTAAATATAAAAT-ATAACTAG**C**-----T**TT**C-----GGA--T**AA**-TTTTAAAT**TTA**AGATTT  
 IES42b -----  
 IES35 -----ACTATTATTT**ATAG**ATACAAAT-ATA**CTA**-----AAAT**TTAA**-----  
 IES104 TTA**ATTAA**TATTATTATTTTTAAATATAAAAT-ATAACT**AA**-----AT**CTT**TATTGG**A**--TTATTTTAAAT**TTCA**AGA--T  
 IES76 TTA-----T**AAA**ATATAAAAT-A-**AA**TTAG**C**-----AT**CTT**TATTGG**A**--TTA**AT**CTAAAT**TTCA**AGAT**TG**  
 CTG13940 -----  
 IES42 TTA-----ATTATTATTTTTTAAAT**AGAA**AT-ATAACTAG**C**-----AT**CTT**TATTGG**A**--TTATTT**ATA**AAAT**TTCA**AGAT**CT**  
 CTG34100 TTA-**TTT**ATATTATTTTTTAAAT**ATAG**AT-ATAACT**AA**C-----AT**TG**TTATTGG**A**--**GT**ATTTAAAT**TTAA**AG**TTT**  
 IES169 TTA-----ATT**ATA**-TTTTTAAAT**TAAA**AT-ATAACTAT**C**-----**CT**CTTATTGG**A**--TTAT**GT**TTAAAT**TTA**AG**AGT**  
 IES103 TTA-----TAG**T**ATTTTTTAAAT**ATAT**AT-ATA**ATTAG**TA-----AT**CTT**TATTGG**A**--TTAT-**TTA**TAT**TTCA**AG**TAT**  
 CTG2630 TTA-----ATT**ACT**ATTTTTTAAAT**TTAAA**AT-ATA**ACA**AG**C**-----AT**CTT**TATTGG**A**--TTATTTTAAAT**TTCA**AGAT**TT**  
 CTG45590 TTA-----ATT**GG**TATTTTTTAAATATAAAAT-ATA**ATTAG**C-----AT**CTT**TATTGG**A**--TTAT**AT**TTAAAT**TTCA**AGAT**TT**  
**AnchoisB** 1782 TTA-----ATTATTATTTTTTAAATATAAAAT-ATAACTAG**C**-----AT**CTT**TATTGG**A**--TTATTTTAAAT**TTCA**AGAT**TT**

CTG36069 -----  
 IES85 TTTT**CA**TA**AA**TTG**CA**AA**TAT**TTTT**C**-----AG**TC**AA**TTT**TTAT**TAT**GGAT**GTTAGTG**AA**TTTTA**AA**TAT**  
 IES57 -----  
 IES214 TTTT**TT**AA**AT**T**G**AA**AA**AT**TTTT**TT**C**-----AT**TC**AA**TTT**TAT**CT**TTGGAT**ATTC**AT**TGA**AT**TTT**G**AA**TAT  
 IES105 TTTT**CA**AA**AT**T**T**CA**AA**AT**TTTT**TT**C**-----AT**TT**AA**AT**TAT**TGG**AT**GTTGG**CA**TGA**AT**TTT**GA**AA**A**AT**  
 IES47 -----T**TT**TAT**AA**T**G**AA**AG**AT**TAT**-TGA**AT**TT**T**G**AA**-----  
 IES80 -----  
 CTG4797 -----  
 IES77b -----  
 CTG826 TTTT**CA**AA**AT**T**G**AC**AT**TT**CTA**-----T**TT**TAT**AA**TTGGAT**TTTGC**TAT**G**AA**TTTT**G**AA**TAT  
 IES132 TTT-----  
 CTG7743 -----TTAG**T**ATAT  
 CTG43276 TTTT**TT**AA**T**TT**G**ACAA**ATA**-TTTT**CC**AT**TC**AT**G**AT**CT**AT**TG**TAT**TAT**TTGGAT**TTGG**TAT**G**AA**TTTT**TAG**AA**TAT  
 IES42b -----  
 IES35 -----ATTGGAT**ATAT**AT**GT**GA**ATTT**TAG**AT**AT  
 IES104 TTTT**CA**AA**TAA**T**G**AA**CA**ATA-TTTT**TT**C-----AT**TC**GA**TT**-TTAT**AA**TTGGAT**GTTGG**AA**TGA**AT**CTT**TT**AA**TAT  
 IES76 TTTT**CA**AA**AT**T**G**AC**AT**T**ATA**-TTTT**TT**C-----AT**TT**AA**TT**-TTAT**TT**T**G**AA**AT**T**GT**AT**TA**-  
 CTG13940 -----  
 IES42 TTTT**T**--AA**AT**T**G**ACAA**TA**-TT**AT**TT**C**-----T**AT**CC**AT**TT**G**TT**ACT**AT**TAG**AT**GTTACT**AT**CA**AT**TT**TAG**AA**TAT  
 CTG34100 TTTT**CA**AA**AT**T**G**ACAA**AT**TTTT**TT**CC**A**-----  
 IES169 TTTT**TT**-AA**AT**T**CA**AA**AT**TTTT**TT**TT**C**-----A**AT**CA**AT**T**G**TT**AT**T**TGG**AT**GTTGG**TAT**G**AA**TTTT**TAG**AA**A**AT**  
 IES103 TTTT--AA**AT**T**G**ACAA**TA**--TT**TT**TT**C**-----AT**TC**AA**TTG**CTAT**TAT**TTGGAT**GTTGG**TAT**AA**AT**TTA**AA**AT**AT  
 CTG2630 **GT**TT**TT**-AA**AT**T**G**ACAA**AT**--  
 CTG45590 TTTT**TT**TA**AT**T**AA**CA**AA**ATA--A**TT**TT**C**-----A**TT**CA**AT**T**G**TAT**TAT**TTGGAT**GTTT**G**TAT**TT**T**TAG**AA**TAT  
**AnchoisB** 1851 TTTT**CA**AA**AT**T**G**ACAA**ATA**-TTTT**TT**TT**C**-----A**TT**CA**AT**T**G**TAT**TAT**TTGGAT**GTTGG**TAT**G**AA**TTTT**TAG**AA**TAT

CTG36069 -----  
 IES85 -CA**AA**CT**T**TAT**TT**CA**TTG**TAA**ATA**TT**CT**AT**C**AT**TT**CA**TAT**TT**G**AA**TG**TAA**A**-TAG**AA**ACT**CC**AG**CT**TT**CA**A-----C**TT**TT**AT**  
 IES57 -----  
 IES214 **AA**AA**AT**CA**TACT**CA**TTG**CA**AA**TA**AT**TT**CT**AT**TAT**AT**C**ATA**AT**TA**AA**T**G**TAA**A**-TAG**AA**ACT**CA**AG**CT**CA**ACT**TT**CT**CT**CT**  
 IES105 -CA**AC**CT**TAT**TT**TG**CA**AG**TAA**TT**CT**AT**T**G**TT**CT**TT**CA**TT**TA**A-----A-**TT**G**AA**-C-----C**TT**CT**CT**AT  
 IES47 -----CT**AT**T**ACT**TT**CA**AA**AT**TT**G**AT**G**TAA**A**-**TC**G**AA**G**CTC**TAG**GT**TT**CA**AA**TT**CT**CT**CT**CT**  
 IES80 -----  
 CTG4797 -----  
 IES77b -----  
 CTG826 -----  
 IES132 -----  
 CTG7743 -G**AA**AT**CT**TAT**TT**TAT**TG**CA**AA**TA**CT**AT**TAT**TT**CT**ATA**AT**TT**A**-T**G**TAA**AT**T**G**CA**ACT**CC**AG**CT**TT**CA**ACT**TT**CT**CT**CT**  
 CTG43276 -G**AG**AT**CT**TAT**TT**A**ATT**G**CA**AA**TA**AT**CT**AT**TAT**TT**CT**ATA**AT**TT**AA**T**G**TAA**A**-TAG**AT**CT**CC**AG**CA**TT**AA**CT**TT**CT**CT**CT  
 IES42b -----  
 IES35 -CA**AA**CT**T**TAT**TT**TAT**TG**CA**AA**TA**AT**TT**T**-TT**AT**TT**CT**ATA**AT**TT**AA**T**G**TAA**A**-TAG**AA**ACT**CC**AG**AA**TT**CA**AA**TT**CT**CT**CT**CT**  
 IES104 -G**AA**AT**CT**TAT**TT**A**TT**T**CA**AA**TAT**CT**CT**TT**AT**TT**CT**ATA**AT**TA**AA**T**A**TAA**A**-A**GA**AA**ACT**TC**AG**CT**TT**CA**ACT**TT**TT**CT**TT**  
 IES76 --A**AT**TT**T**AT**T**-A**TT**CA**AA**TA**AT**TT**CT**AT**A**AT**TT**CA**TAT**TT**AA**T**G**TAA**A**-TAG**GA**ACT**CC**ACT**TT**GA**ACT**TT**CT**CT**CT**  
 CTG13940 -----  
 IES42 -G**AA**AT**CT**TAT**T**A**ATT**G**T**AA**ATA**AT**CT**AT**TAT**TT**AA**TA**AT**A**TT**TT**G**TAA**A**-TAG**AA**ACT**CC**AG**CA**TT**CA**ACT**TT**CT**CT**CT**CT**  
 CTG34100 -**TTT**AA**TT**AT**TT**TA**AT**G**CA**AA**TA**AT**TT**CT**AT**A**AT**TT**CT**ATA**AT**TT**AA**T**G**TAA**A**-TAG**AA**ACT**CC**AG**CT**TT**CA**AA**TT**CT**CT**CT**TT**  
 IES169 -G-**A**AT**CT**TAT**TT**TAT**TG**-AA**TA**AG**CT**AT**TAT**TT**CT**ATA**AT**TT**AA**T**G**AA**A**-A**AG**GA**ACT**TC**AG**CT**TT**CA**ACT**TT**CT**CT**CT**  
 IES103 -G**AA**AT**CT**TAT**TT**A**TT**G**CA**AA**TA**AT**CT**AT**TAT**TT**T**ATA**AT**TT**AA**AG**T**AA**A**-TAG**AA**ACT**CC**AG**CT**TT**CA**AA**TT**CT**CT**CT**CT**  
 CTG2630 -AA**AT**CA**TAT**TT**T**T**TG**CA**AA**TA**AT**TT**CT**AT**TAT**TT**CT**ATA**AT**TT**CA**AA**CT**AA**TG**TAA**A**-TAG**AA**ACT**CC**AG**CT**TT**CA**AA**TT**CT**CT**CT**CT**  
 CTG45590 -G**AA**AT**TT**TAT**TT**TAT**TG**CA-----T**AT**ACT**TT**CT**ATA**AT**TT**AA**TG**CA**AA**-TAG**AA**ACT**AT**CA**AG**CT**TT**CA**ACT**TT**CT**CT**CT**  
**AnchoisB** 1922 -G**AA**AT**CT**TAT**TT**A**TT**G**CA**AA**TA**AT**CT**AT**TAT**TT**CT**ATA**AT**TT**AA**T**G**TAA**A**-TAG**AA**ACT**CC**AG**CT**TT**CA**ACT**TT**CT**CT**CT**CT**

CTG36069 -----  
 IES85 GTAATAGTATTATTACTATAGCAGGCCCGACATTTAAAAATAAATAAGATATGCAAACAATGATGACTGTCCATAA  
 IES57 -----  
 IES214 GTAATAATATTATT-GTTATAGTAGGCCCTTACATGTAAAFCAGATTGTTT-----A  
 IES105 ATAA-AATATATTTCGCTATA--GGCCTTACTTAATAAATACATATATAAATATAGATGCAATGATCAATACCAATAA  
 IES47 GAAATAATATTATTTGCTGTCGTAGGCCCTTACACTTAACTACATAATGTAGATGCACATGAAAGATGACTGTCACTAA  
 IES80 -----  
 CTG4797 -----TAGCTGGCCTTACACTTAACTACATTATGTAGATGATATGAATGACGACTGTCAATAA  
 IES77b -----  
 CTG826 -----  
 IES132 -----  
 CTG7743 GTAATGATATTATTTGCTATAGCAGGCCCTTGCATTAACCTTCATTAAATAGACATGCACACAGAGATGACTATCAATAA  
 CTG43276 GTAATAATATTCTTTGCTATAGCAGGCC-TACACTTAAATAACATAATGTAGACATACATGCAATAATGACTGTGCATAA  
 IES42b -----  
 IES35 GAAGTAATATTATTTGCTATAGTAGGCCCTTACACTTCAACTACATTATGTAGACATATTTGCAATTATAACTGTCAATAA  
 IES104 ATAAAGAAATTTTGGCTGTAGTAGGCCCTTACACTTAACTCAAAATCTGTAGACATACATTAACAATGATGACTGCCAATAA  
 IES76 TTAATAATATTTTTGC AATAGCAG-CCTTATGTTTAACTACAAATGTAGACCTAAATGCAATGATGACTGTCAATAA  
 CTG13940 -----  
 IES42 GTAATAATTACTTTGATATA-CAGGTCTTACACTTTGTTTACATTATGTAGATATACATGCAATGA---CTGTCAATAA  
 CTG34100 GTAATAATATTATTTGCTATAGCAGGCC-----  
 IES169 GTAATAATATTCTTTGCTATAGCAGGCCCTTAACTTAACTTACATTATGTAGACATACATGTAATGATGCTTCTTCTATAA  
 IES103 GTAATAATATTCTTTGCTATAGCAGGCCCTTAACTTAACTTACATTATTTAGACATACATGCAATGATAATGTGCAATAA  
 CTG2630 GTTATCATATTCTTTGCTATAGCAGTTCCTTACGCTTAAAGCTACGTTATATAGACATACATGATATGATGATGTGCAATAA  
 CTG45590 GTAATAATATTCTTTGCTATAGCAGGCCCTTAACTTAACTTACATTATGTAGACTTACATGCAATGATGACTGTCAATAA  
**AnchoisB** 2000 GTAATAATATTATTTGCTATAGCAGGCCCTTACACTTAACTACATTATGTAGACATACATGCAATGATGACTGTCAATAA

CTG36069 -----GA-----  
 IES85 TATAGTTAA--ACTATGTATATGAAAAACGA---TTTTCT-TCAAAA--AACAGA-AAATTCAGAGTTGATAACT  
 IES57 -----  
 IES214 TGGTATCAA--ACCTATGTGTATGAAAAAGA---TTTTCC-TCCTAAACAAAAAGC-AGATGCAGGATTTGATTACT  
 IES105 ATTTATTAA--ATCTATATGTACGAAATAAAAAA---TTTTCA-TCAAAAATAA-CAGG-AAATGATGAAATGATTACC  
 IES47 ATTTATTAA--ATCTATGCGTATGTAGAAAAAGA---TTTT-----AACGGC-ACATGCAGTAATGATTACT  
 IES80 -----  
 CTG4797 -----  
 IES77b TTTTATTAA--ATCTATGTGTATAAAGAAAAA---TTTTCA-TCAAAACAACTAGC-AATTACAAGAATTGATTATT  
 CTG826 -----  
 IES132 -----  
 CTG7743 TTGTATTAA--ATCTAATTGAATGAAAGAAA---TTTTAG-CCAAAACAAAACA--ATATGCATGAATTCATTCT  
 CTG43276 TTTTATTAA--CAAATGTGTATGAAAAAAGA---TTTTCA-TCAAAA-CAACAGC-AACTGCAGGAATTGATTACT  
 IES42b -----  
 IES35 TTTTATTAA--ACCTATGCGCAAAAAAACA---TTTTCA-TCAAAGCATAGCAGC-AATTCAGGAA-----  
 IES104 CTTTATTAA--ACCTATGCGGATGAAAAAAGA---TTTTTA-TCAAAACAAAACAGC-AATTCGATTAATTCATTACT  
 IES76 TTTTATTAA--ACCTATG---TGAAAAGAAAAAACCCTTTTCA-TC-AAACAAAACAGC-AATTCAGGAGTTGATTACT  
 CTG13940 -----  
 IES42 TTTTGTAA--ACCTATGTGTATGAAAAACAAAAGATTTA-TCAAAACAAAACAGC-AATTCAGGAATTGATTACT  
 CTG34100 TTTTATTAA--ATCTAATGTATGAAAAAAGA-TTTTCAAAAATAATACAGC-AATTCAGGAATTGATTACT  
 IES169 TTTTATTAA--ATCTAATGTATGAAAAAAGA-TTTTCAAAAATAATACAGC-AATTCAGGAATTGATTACT  
 IES103 TTTTATTAA--ACCTATGCGTGTATGAAAAAAGA---TTTTCA-TCAAAACAAAACAGC-AATTCAGGAATTGATTACT  
 CTG2630 TTTTATTAA--ACCTATGCGGATGAAAAAAGA---TTTTTA-TCAAAACAAAACAGC-AATTCGATTAATTCATTACT  
 CTG45590 TTTTATTAA--ACCTATATGAATG-AAAAAGAAATA-TTTTCA-TCAAAACGAACAGC-AAT-----TTGATTGAT  
**AnchoisB** 2080 TTTTATTAA--ACCTATGTGTATGAAAAAAGA---TTTTCA-TCAAAACAAAACAGC-AATTCAGGAATTGATTACT

CTG36069 -----ATTATATA-----  
 IES85 TTCTATGACGC---CATAAATAACTAG-CAAAA-TTATAAAT--AATAAGGGATGTAATACTAAGAAAA---GTTTGGT  
 IES57 -----  
 IES214 TTGGATAATGCACTTAAAACTATATAG-CAAA-TTTATAAAC--AATAAGGAAGTACCCTGAGAAAAA-G-ATTCACT  
 IES105 TTGTATATTAACCTT-AAATTATATAC-CAAAAATTAGAAA--GTAAAGGGAAGAAACCTAC-  
 IES47 TTGGATGATGCAAAAT-AAATTATATAG-TAAAACTTATAAA--AACAAAGAAAGAAAGCCTTAGAAAAAGCATTAAACA  
 IES80 -----  
 CTG4797 -----  
 IES77b TTGGATGTTGAGCCTAAAATTA-----TAAAAA-----AAAAGGAATGAGACTCTAAGATAAAGG-----  
 CTG826 -----AAAAATTAACAAC-AAAAGGGAAGAAAATGAGAGAAAAAACTACCAA  
 IES132 -----CAAAAATAAAAT  
 CTG7743 TTGGATGATGCACTTAAAAATAAATACTCAAAAATCTAAAC-AAAAGGGAAGAAAACCTAAGAAAAAAG-ATAAACA  
 CTG43276 TAGGATGATGTGCTTAAAAATATAT-----AAAAATAAATAA--AAAAGGTAATAAAGGCTA-----ATTGACA  
 IES42b -----  
 IES35 -----GAAGAAACCTAAGAAAAAAG-ATTAACA  
 IES104 TTGGATGATGCGCTTAAAAATTAAC TAG-CAAAAATTATAAACAAAAAGGGAAGAAAGCGCTAAGAAAAA-G-ATGAACA  
 IES76 TTGGATGATACGCTTAAAAATATATAG-CAAAA-TTATAAAC-A-----ATTAA-A  
 CTG13940 -----  
 IES42 TTGGATGATGCGCTTAAAAATATATAC-CAAAAATTATAAAC-AAAAGGGA-----AAAAG-ATTT-CA  
 CTG34100 TTGGATAACGGCCTT-AAATTATA---GCAAAAATATAAAC-AAAAGGGAAGAAAACCTAAGAAAAAATA-GTTAAATA  
 IES169 TTGGATGATGAGC-TAAAAATATATAG-CAAAATTTATAAAC--AAAAGGGAAGAAACGATAAATAAAGATTAAACA  
 IES103 TTAGACGATGAGCTT-AAATTATATAG-CAAAATTTCTAATC-AAAAGGGAAGAAAATGCTAAGAAAAAAGATTAAACA  
 CTG2630 TTTTATGATACCTTAAAAATATATAG-CAAAAATTATAAAC-AAAAGGATGAAACGCTAAGAAAAA-G-ATTAACA  
 CTG45590 TTGGATAATGAGCTTAAAAATATATAG-CAAAATTTATAAAC--ATAAGGGAAGAAACCTTAAAGAAAAAAG-ATTAAC-  
**AnchoisB** 2155 TTGGATGATGCGCTTAAAAATATATAG-CAAAAATTATAAAC-AAAAGGGAAGAAACGCTAAGAAAAAAG-ATTAACA



CTG36069 -----  
IES85 AACCTAAGAGAGTAAATATA-TTTATATC-TAAGTAAATTCAGTTAAATGTAAATFGATTAGCCCTTTAAACTCCTAA  
IES57 -----TCTCAATC-----  
IES214 AACCCAAGAGAGCAAATATA-TTTAAATCTTAACTAAATTTTCAAGATAAAAGTAAATAGGTTTAGAGTTAGGAACCTTCAA  
IES105 -----TTAAAT-----  
IES47 -----ATA-TTAAATCTTAAATAACTTTCAAGTTTAGGCAAATATTTTAGAATTCAGGAACCTTCTAT  
IES80 -----  
CTG4797 -----  
IES77b --ATTAAAAAGTAAAGTAAA-TTTAAATCTTAACTAGCTCTCAAATTCAAATTAATTTGCTTAAAGATTAAGAACTTTTAT  
CTG826 AACCTAAGATACCGAATATA-TTTAAATCTTAACTTCAAGCCAAAGTAAATTAATTCAGGATTAGAAACTTCTAT  
IES132 -----  
CTG7743 AATCTAACAGAGCAAATATATTTAAATCATATCGAAGCTTTAAATTTAAAATAAATCGCTTCAGAATTAAGAACTTCTAT  
CTG43276 AGCCTAAGTGAAGCAAATATA-TTTAAATCTTAACTTCCAGTCAAAGTAAATTTGCTTAAAGATTAGGAATTTCTAT  
IES42b -----  
IES35 AACCTAGGAGAGAAAATATA-TTTAAATCTAACTAACTTTCAAGTAAAGTAAATCGCTTCAGAATTAGGAACCTTCTAT  
IES104 AACCTAAGAGAGCAAATATA-TTTAAATTTTAACTAAATTTTAAATTAAGTAAAGTTGCTTAAAGATTAAGAACTTCTAT  
IES76 TACCTAAGAGAGCAAATATA-TGCCAATCTTAAATTAAGTTTCAAGTTAAAGTAAATTTGCTTCAGAATTAGGAACCTTCTAT  
CTG13940 -----  
IES42 AACCTA----AGCAAATATA-TTTAAATCTTAACTAACTTTCAAGTAAAGTAAATTTGCAACGAATTAAGGAACCTTCTAT  
CTG34100 AACCTAAAAGAA-AAATATATTTTAAATCACTAACTAAATTCAGT----TAAATTTGCTTTAGATTTAGGAATTTCTAT  
IES169 AACCTAAGAGAGCGAATATC-TTTAAATCTTAACTAACTCTCTTTGTTAAAGTAAATTTGCTTACGAATTAGGAACCTTCTAT  
IES103 AACCTAAAAGAGCAAATATA-TTAAATATTAACCTAACTTTCAAGTAAAGTAAATTTCTTAAAGAACTTTGGGAACCTCTAA  
CTG2630 AACCTAAGAGAGCAAATATA-TT-AAATCTTAACTAACTTTAAAGTTAAAGTAAATTTGCTTACGAATTAGGAACCTTCTAT  
CTG45590 AATAAAGATAGCAAATATA-TTT-AATCTTAACTAACTTTCAAATTAAGTAAATTTCTATCAGAATTAGGAACCTTCTAT  
**AnchoisB** 2231 AACCTAAGAGAGCAAATATA-TTTAAATCTTAACTAACTTTCAAGTAAAGTAAATTTGCTTAAAGATTAGGAACCTTCTAT

CTG36069 -----  
IES85 AAAACCTG-CAATTT-AGCTGGATATTTAGGAATTTCAATTTGGAAGGACTAAATATCTAT-AAAATTAATTTCTATAGTA  
IES57 -----  
IES214 -----TGATTTTGGTAGGATATTTGGAGTCTTAATTA-----AAAAGTAAAGTTAGAGATTA  
IES105 -----CAAAATTTACAAAGATATTTGGAAATTTCAATTTGGAATAGGCTAAATATATAT- --AAGTAAATTTGAGAGTA  
IES47 AAAACCTA-TCATTTTGCAGGATATTTGAGGAATGTCATTTGGAAGGCG-CAATATAAAT-AAAAGAACGTTCTAGATA  
IES80 -----GT-----  
CTG4797 -----  
IES77b AAAACTTG-CAATTT-AGCAGGATACTTAGGAATTTCACTTCAAAGGGCTAAATATCTCT-AAAAGCAATTTCAAGAGTA  
CTG826 AAAACCTGCAATATTTGGCAGAAATATTTAGGATTTTCAAATAGGAGGGCTAAATATATAT-AAAAGTAAAGTTCCAGAGTA  
IES132 -----  
CTG7743 AAAACCTG-TAATTTCTGCAGGATA-TTAGGAATTTCAATTTGAAATGCTAAACATCTAT- --AAAATAAGTTCCGAGAGTA  
CTG43276 AAAACCTT-CAACTTTAGTAGGATATTTGGAAATTTCAAATGGAAGGGCTAAATATCTCT-AAAAGTAAATTTCAAGAGTA  
IES42b -----  
IES35 AAAACATG-CAATTTTAGTAGGATACTAAGGAATTTCAATTTTAAGTTGCTAAATTTCTAT-AAAAGTAAAGTTCCGAGAGTA  
IES104 AAAAACCTGCAATTTTAGCAGGATAAAAAGGATTTCAATTTGGAAGGCTAAATATCTCT-AAAATAAGTTGAGAGTA  
IES76 A-AACCTG-CAAAATTTAGCAGAAATAGTTAAGAATTTCAATTTGGAAGG-CTAAATATCTATAAAAAGTTAGTTCAAGATCT  
CTG13940 -----  
IES42 ATAACCTG-CAATTTTAGCAGGATATTT--GAGTTTCAATTTGGAAGGGCTAAATATCTCT-AAGAGCAAGTTCCGAGAGTA  
CTG34100 AAAACCTGAAAATTTTAGCAGAAATATTTAGGAATTTCAATTTGGAAGGAGGCTAAATAGCTAT-  
IES169 AAAACCTG-CAATTTTAGCAGGATATATAGTAATTTCAATTTGGAAGGACTAAATATTTCT-AAAAGAAAGTTCCGAGAGTA  
IES103 AAAACCTG-AAATTTCACTAGGATATTTAGGAATTTCAATTTGGAAGGGCTAAATATCTT- --AAGGTAAGTTCTAGAGTA  
CTG2630 A-----  
CTG45590 AAAACATG-CAATTTTAGCAGGATATTTAGGAATTTTAATTTGGAAGGGCTAAATATCTCT-AAAAGTAAAGTTCCGAAGCA  
**AnchoisB** 2310 AAAACCTG-CAATTTTAGCAGGATATTTAGGAATTTCAATTTGGAAGGGCTAAATATCTAT-AAAAGTAAAGTTCCGAGAGTA

CTG36069 -----  
IES85 TCCCTCATTCTCT-----AATTTACTTTTTTATTT-GATA-----AATAGCACAAATATGGATTTCGA-ATTT  
IES57 -----  
IES214 TCCCTATTCTCTGAGTCGAT-AACTTA-TTTTTCATCT-AAAG-----AATACTACAAATATGGATTGAATCATT  
IES105 TCCCGAATCTCTGAGTCAAC-----ATAGAACAAATTAAGAAATAAAACCTG  
IES47 CCCAGGTTCTTTGAGTCAAT-AATTTGCATTT-CATTTGATG-----AATAGCATGAATTAAGGATAGAAAATTTG  
IES80 TTCCGATTCTCTGAGTTAAC-GAG-TGCTTTTTCATTT-GATG-----AATAGCATAAATATGGATTGGAAAATTT  
CTG4797 -----  
IES77b TCCCGATTCTCTGTG-----AATAGCAAAAATATGGATTGTAAAATTC  
CTG826 TCCAGATTCTCTGATTTCAAT-AATTTGCTTTT-CATTT-GATG-----TATAGCACATG-----  
IES132 -----  
CTG7743 TCCCAATTTCTCTGATTTCAAC-GATTTGCTTTTTTCAATTT-TATG-----AATAGCATAA-----ATTT  
CTG43276 T-----GGATTCTCACTCAAT-AATTTGCTTTATCATTT-GATG-----AATAGCACAAATATGGATTGAAAATA  
IES42b -----  
IES35 TCCCGATCTCTAAGTCAAT-AATTTGCTTTTACAGTT-GATG-----AATAGTGCAGTTATGAGTTGAAA--TTT  
IES104 TGCCGATTCTCTGAGTCAAT-AATTTGTTTTTTCATTT-GATTT-----TAATAGCACAAATATGGATTGAAA-ATTT  
IES76 CCC--ATCCTCAGAGTCAAT-AATTTGCTTTTTTCAATTT-TATG-----AATAGCACAAATATGAATTTGAAAATTT  
CTG13940 -----  
IES42 TCCCGATTCTCTGAGTCAAT-AATTTGCTTTTTAATTT-GATG-----AATAACACAGATTATTTGATTGAAAATTT  
CTG34100 -----  
IES169 TCCCGATTCTCTGAGTCAAT-AATTTGCTTTTTTCAATTT-AATG-----AATAGCATAAATATGGATCCAAAGATTT  
IES103 TCCCGCTTTCTCTGAGTCAATAAATTTGCTTTTTTATTT-GAAG-----AATAGCTCAAATATGGATCGGAAAATTT  
CTG2630 -----  
CTG45590 TCCCGATT---TGAGTCAAT-AATTTGCTTTTTTCAATTT-GATGATTTGATAAATAGAAC-AATATGGATTGAAAATTT  
**AnchoisB** 2388 TCCCGATTCTCTGAGTCAAT-AATTTGCTTTTTTCAATTT-GATG-----AATAGCACAAATATGGATTGAAAATTT

CTG36069 -----  
 IES85 **CTAGCTTTAGATAATGTTGCACCTTGGG---TGTAAAACAAATATAATCAGAATTCA-TTGTAAATTTTTCACATAAAT**  
 IES57 -----  
 IES214 GTAGCATAAGATA**GTGTAA**CGCAATTGA**AC**AGTCAAAA**CA**AAATATAT**AA**AGAATTC**GT**TTATAAAATTTT**AA**TATTAATC  
 IES105 **ATAGACTAA**TTAATTT**AC**ACAAT**TT**GCAGCA-TG-AAAA--**AA**T**CA**AG**AA**AG-ATT**CA**-TTGT**TA**ATTTT**AA**TATTAATA  
 IES47 **GTAGTCTA**AGAT**GAT**GTTGCACACT**TT**GAGCAGTGC**AAA**ACA**TAT**GGATT**GAA**ATT**CA**-TG**GT**AAATTT-CATATTAATA  
 IES80 **GTAGT**TTAAGATAATGTTGCACACT**TT**GAGCAGTGC**AAAA**T-AATATATTA**GAA**ATT**CG**-TTGTAAATTTT**CA**AATTAATA  
 CTG4797 -----  
 IES77b **GTAGCATA**AGATAATGTTGCACACT-----**AA**GAATTC**G**-TTGT**GA**ATTTTCATAT**TAGCA**  
 CTG826 -----**TA**GAATTC**A**-TTGT**AA**-----**TT**CATAT**TAA**-----  
 IES132 -----  
 CTG7743 **TTACT**TTAAGATAAT**GTC**GTACACT**TT**GAGCAG**AGCT**ATACAAATATATTAAGAATT**CA**-**TAGTAT**ATTTTCATAT**GA**ATC  
 CTG43276 **GTAGCT**TAAGATA**AG**TTGCACACT**TT**GAGCAGTGC**AAAA**T**AA**ATA**CT**GT**AA**T**AA**A**TCA**-TT**G**AAAAATTTTCAT**TT**TCATC  
 IES42b -----  
 IES35 **TCAGCT**TA**TA**ATAATGTTGCACACT**TT**GAG**TAG**TGC**AA**-ACAATATAT**AA**GT**AT**TT**CA**-TTGTAAATTTTCATATTAATC  
 IES104 **TTAGCT**TAAG**TTA**ATG**T**CGCACACT**TT**GAG**CA**AT**G**AAAA**CA**AA-----**TA**GAAT**TG**-TTGTAAATTTT**TC**ACA-----  
 IES76 **GTA**ACTTAAGATA**CGT**AGCACACT**CGA**ACAGT**G**-**GAA**CAAAATATATTAAGAATT**CA**-TTGT-**AA**TTTT**CA**AATTAAT  
 CTG13940 -----  
 IES42 **GTAGT**T-----**TG**TTGCACAT**CT**GA**ACA**TT**G**CAAAA**TAA**ATATATTAAGAATT**CA**-TTGTAAATTTTCATATTAATC  
 CTG34100 -----  
 IES169 **TTAGT**TT**AA**AA**TGAT**CTGCACACT**TT**GAGCAGTGC**AA**-----**AA**TAT**GT**TTAG**A**ATT**CA**-**TAG**TAAATTTTCATATTAAT  
 IES103 **GTAGC**ATAAG**TTA**ATG**TTA**CACACT**TT**GAG**CA**AT**G**-----**AT**TAAGAATT**CA**-TTGTAAATTT-CATATTAATC  
 CTG2630 -----  
 CTG45590 **GTA**ACTTAAGATAATGTTGCACACT**TT**GAGCAGTGC**G**AAA**T**-AATATATTAAGAATT**CA**-TTGTAAATTT**CC**CATATTA--**T**  
**AnchoisB** 2458 **GTAGCT**TAAGATAATGTTGCACACT**TT**GAGCAGTGC**AAAA**CAAAATATATTAAGAATT**CA**-TTGTAAATTTTCATATTAATC

CTG36069 ----**A**-----**CA**ACTGCAATTT**CAT**AG**TTTT**TTTT**AT**GGTT**TA**AGCAACT**TT**GGGTTGTATA**ATT**ATCGCTTACT**TAGT**  
 IES85 **AATAA**-----**CA**ACTGCAATTT**TA**AT**AG**CC**TTTT**TAGT**GA**TT**TA**AG**AA**ACT**TT**AG**CT**GCATACTTATCGCTTACT**TTG**-  
 IES57 -----  
 IES214 **AATAA**-----**CA**ACTG**CA**TTT**CAT**TC**G**-TTTT**TT**AGT**CA**TT**TA**AG**CA**ACT**TT**GGGTTGTATA**TT**GATGGCTTACT**TAA**-  
 IES105 **AATAA**-----**AA**ACT**ACA**ATT**GT**AT**TC**AT**CT**TTTT**TA**TTGGTT**TA**GG**AA**ACT**TT**GGGTTGTATA**TTA**ATCGCT**AA**TT**TAG**  
 IES47 **AAATA**-----**ACA**ACTGCAATTT**AA**TAT**CT**CAT**TT**AGT**AG**TT**TA**AG**TA**ACT**AC**GGTTGTATACTTAT**AG**TTACT**TAA**-  
 IES80 **AATAA**-----**CA**AT**TT**AA**TT**CCAT**TCA**-TTTT**TT**CA**AT**GGTT**TA**AG**CA**ACT**TT**AGTTGTATACT**AA**T**TG**CTTACT**TAG**-  
 CTG4797 -----  
 IES77b **AATAA**-----**CA**ACTGCAATTT**TAT**T**CA**-TTTT**TT**AGT**GT**TT**CA**AA**CA**ACT**TT**GGGTTGTATA**TTT**AT**AC**TTACT**TAG**-  
 CTG826 -----**CA**ATTT**TAT**T**CA**-TTTT**TT**AGT**TG**TT**AA**AG**CA**ACT**TT**GGGTT**TT**CTACTTATCGCTTACT**TAG**-  
 IES132 -----  
 CTG7743 **AATAA**-----**CA**ACTGCAAT**AT**CT**TT**CAT**ATT**GT**TAG**TGG-**GTA**AG**G**ACT**TT**GGGTT**GC**ATAC**AT**ACT**CA**CTT**AG**-  
 CTG43276 **AATAA**-----**CA**AG**T**GCAATTT**CAT**TA**AT**TT**CT**TAGT**CG**TT**TA**G-----  
 IES42b -----  
 IES35 **AATAA****CA**AT**TG**CAAT**TG**CAATTT**CAT**CT**TTTT**TTTT**AG**TGGT**ATA**AG**GA**ACT**TT**GGA**TTGT**-----  
 IES104 -----  
 IES76 **TATAA**-----**CA**AT**TG**CCATTT**AA**TT**CA**CT**TTTT**TTAGTGGTT**TA**AG**CA**AA**TT**GGGTTGTATACTTAT**TG**TT**AT**T**G**T**AG**-  
 CTG13940 -----  
 IES42 **AATAA**-----**CA**ACTGCAATTT**CAT**TA**A**-TTTT**TT**AGTGG**CT**TAAG**CA**ACT**TT**GGGTT**AT**TT**TG**CTTAT**TG**CTTACT**TAG**-  
 CTG34100 -----  
 IES169 -----**CA**ATTT**CAT**TCATTT**TT**TTAGGGTT**AA**AG**TA**ACT**TT**GGGTT**AT**ATACTTATCGCTTACT**TAG**-  
 IES103 **AATAA**-----**CA**ACT**TCA**ATTT**CA**-**AA**ATTT**TT**TTAGTGGTT**TA**AG**AC**ACT**TT**GT**TT**ATATA**TT**TAT**AC**TTACT**TAAGT**  
 CTG2630 -----  
 CTG45590 **AATAA**-----**CA**ACTGCAATTT**CAT**TA**A**-TTTT**TT**AGTGGTT**TA**AG**CA**ACT**TT**GGGTT**AT**ATA**ATT**ATCGCTTACT**TAG**-  
**AnchoisB** 2537 **AATAA**-----**CA**ACTGCAATTT**CAT**TCATTT**TT**TTAGTGGTT**TA**AG**CA**ACT**TT**GGGTTGTATACTTATCGCTTACT**TAG**-

CTG36069 **TTG**TTT**AT**TT**GG**AGT**TA**AAA**CC**--**AA**TGCT**AT**TTAGAA**AG**TT**GAT**TT**GAG**TT**TG**CAAA**ATA**ATTA**ACTA**AT**CT**TT**TA**  
 IES85 **TTG**CTTT**AA**TTTT**TA**-AT**CT**CA**AA**CA-**AA**AT**GA**ACT**TT**G**AG**TT**TA**GA**AG**ATTT**TA**ATTT**G**CAAA**ATA**ATTA**ACT**AC**CA**CT**TA**  
 IES57 -----  
 IES214 **TTGA**TT**TA**ATTT**GT**AAA**ACT**CA**AA**CC-**AA**ATG**CT**CTTTAGAA**AG**T**GT**TTT**GA**ATTT**ACA**-**AA**TAATTA**ACTA**AT**CG**T**CTA**  
 IES105 **TTG**CTTT**AA**TTTT**TA**AT**CT**CA**AA**CC**AA**AA**TT**CT**TT**TAGAA**AG**AG**A**-**TT**G**AT**TT**G**CAAA**ATA**AT**TAA**-TACT**GT**TT**CTA**  
 IES47 **TTGA**ATTAATTT-**AA**AT**TT**CA**AG**CC-**AA**ATG**CT**CTTT**CA**AA**AG**AGATTT**GA**AT**TC**G**CA**AA**ATA**AT**T**-**G**CTACT**AT**TT**TA**  
 IES80 **TTA**CTTT**G**ATTT**TA**AT**CT**CA**AA**TC-**AA**CT**TG**CTTT**AA**AT**AG**-AGATTT**GA**ATTT**G**CAAA**ATA**ATTA**ACTA**AT**CT**---**A**  
 CTG4797 -----  
 IES77b **TAG**CA**TTA**ATTT**AA**TAT**CT**TA**AA**TT-**AA**AT**CT**CTTTAGAA**AG**AT**AG**TT**TGA**TT**TT**GG**AA**ATA**AT**TA**ACT**ACT**CT**TT**CTA**  
 CTG826 **TCG**CTTT**AA**CT**TTA**AT**CT**CA**AA**CC-**AA**AT**CT**CTTTAGAA**AG**AG**TT**TT**GA**ATTT**G**TA**AA**ATA**AT**TA**ACT**ACT**CT**TT**CTA**  
 IES132 -----  
 CTG7743 **TTG**CGTT**AT**TTTT**TA**AG**CT**CT**TA**ACC-**AA**ATG**CT**CTTTAGAA**AG**AGATTT**GA**ATTT**G**CAAA**ATA**ATTA**ACT**CT**CT**TT**CTA**  
 CTG43276 -----  
 IES42b -----  
 IES35 -----  
 IES104 -----  
 IES76 **TTG**T**G**TT**AA**TTTT**AA**AT**CT**CA**AA**CC--**AA**ATG**CT**G**TG**TA**GA**AA**AG**AGATTT**GA**ATTT**G**CAAA**ATA**AT--**CT**AC**CA**CT**CT**-  
 CTG13940 -----  
 IES42 **TTGA**TT**AA**TTTT**AA**AT**CA**CA**AA**CC**AA**AA**TG**CT**CT**TTAGAA**AG**AGATTT**GA**ATTT**ACA**AA**ATA**ATTT**AC**CA**CT**CT**CT**CA**A**  
 CTG34100 -----  
 IES169 **TTG**CA**TTA**ATTT**TA**AT**CT**CA**AA**CA-**AA**AT**GT**CTTTAGAA**AG**AGATTT**GA**ATTT**G**CAAA**ATA**AG**TT**AT--**CT**CT**CT**CTA  
 IES103 **TTG**CGTT**TA**TTTT**AA**AT**CT**CA**AA**CC-**AA**GC**CT**CTTTAGAA**AG**AGATTT**GA**ATTT**G**CAAA**ATA**ATTT**ACT**ACT**CT**TT**CTA**  
 CTG2630 -----  
 CTG45590 **TTA**CGTT**AA**TTTT**TA**AT**CT**CA**AG**CC**AA**AA**ACT**CT**CT**TTAGAA**AG**AGATTT**GA**ATTT**ACA**AA**ATA**ATTT**ACT**ACT**CT**TT**CTA**  
**AnchoisB** 2610 **TTG**CTTT**AA**TTTT**AA**AT**CT**CA**AA**CC-**AA**ATG**CT**CTTTAGAA**AG**AGATTT**GA**ATTT**G**CAAA**ATA**ATTA**ACT**ACT**CT**TT**CTA**

CTG36069 AGTTAAAAATCAAAA-ATTACTTTAC--GATAAATATACTTTGGGAGAAAFTTAAA-----TGCT--CAAAA-  
 IES85 AGTACAAAATAAAA-ATTAGTCTTCATTGATGAAGGTAGCCTTTGAGAAAACCTAAA-ACCTGGAGGACATGGC-AAAA  
 IES57 -----  
 IES214 AATTCAAAATTATAA-ATTAACTCTATTAAAGAATACAACCTTTCTGAGAACTTTAAGAGCTGGACGATGTGCC--AAA  
 IES105 AGTTAAAAATGATAA-ATTAGCCTACATTGATGAATGTAGC-----  
 IES47 AGTTCATATTAATAA-ATTAGTCTGCATTGATGAATCTTGCTTT-GGAGAACTTTAA-AGTTGGACGATGTTAGC-AAAG  
 IES80 AGTTAAAAATTAATAA-ATTAGTCTACATTGATGAATGTAATTTTGGAGAACTTACA-AGCAGGACGATGCTGGCAAAAA  
 CTG4797 -----  
 IES77b AGTTTAAATTAATAA-ATTAGTCTACATTGATGAATTCAGCTTTTGGAGAACTT-AA-AGCTGGATGATGCTTGC-AAAA  
 CTG826 ATTTCAAAATTAATAA-TTTAGTCTACATTGATGAATCTAATTTATTAGGAGAAACATAA-AGCTGGACGATG---GC-AAAA  
 IES132 -----  
 CTG7743 AGTTCAAAATTTAAACATTAGTCTACATTGATGAATGCAGCTTTGGGAGAACTTAAA-T-CTGGACGATGCTGGCAAAAA  
 CTG43276 -----  
 IES42b -----  
 IES35 -----  
 IES104 -----  
 IES76 -----  
 CTG13940 -----  
 IES42 AGTAAAAATTAATAA-ATTAGTCTAATTGATGATGTAACCTTTAGGAGAAACATAAA-TGCAAGACGATGCTGGCAAAAT  
 CTG34100 -----  
 IES169 AGTT-ACATTAATAA-ATTAGTCTAATTATTATTA-----TGGGAGAACTTAAA-AGCTGGACGATGCTGGCAAAAA  
 IES103 AGTTAAAAAT-AAA-ATTAGTCTACATTGATGAATTTAGCTTTGCGAGAACTTTAGA-AGCTGGACGATGCTGGCAAAAA  
 CTG2630 -----  
 CTG45590 AGTTAAAAAT-AAA-ATTAGTCTGATATTGATGAATGTAGCTTTGGGAGAACTTAAA-AGCTGGGCAATGATGGCAAAAA  
**AnchoisB** 2689 AGTTAAAAATTAATAA-ATTAGTCTACATTGATGAATGTAGCTTTGGGAGAACTTAAA-AGCTGGACGATGCTGGCAAAAA

CTG36069 -----  
 IES85 AACCAATAGT--TATCCATTATTATAAATAGAAATCG-AACTCCATAAAAA-GTAACTGTGTAAA---TGATGCTATAGGTT  
 IES57 -----  
 IES214 AAGAATATT--TATGCATCGCTGTAATAAAATCG-AATTCCTCAAAA--TAAATGTGTAAT---TGGTGCCATCTTTT  
 IES105 -----  
 IES47 AAGAATAGT--TATCCATTACT-TTAAACAAAATCG-AACTACTTAAAAA-AATAATGTGTAAT---TAGTGTATCGGTT  
 IES80 ATGAA-AGT--TATCTATTGCTGTAAGTAAATCG-AGCTCATCAAGA-GTAA-----  
 CTG4797 -----  
 IES77b AAGAATATT--TATCCAATGGTGTAAATAAAATCGGAA-TCCTC-AAAA-GTAAATGTGGGAT---TGGTGCCATCTTTT  
 CTG826 AAGAATATT--TATCCATTGCTATTAAATAAAATCG-AACTCCT-AAAAA-GTAAATGTGTAATTGGTGGTGTACTGTT  
 IES132 -----  
 CTG7743 AAGAATATT--TAACAATTGCTGTAATAAAATCG-AACTCCTTAAAAA-TTAAATGTAGAAT---TGGTCAATCTTTT  
 CTG43276 -----  
 IES42b -----  
 IES35 -----  
 IES104 TAGT--TACCCCTACCGTAAATAAAATCG-AACTCTTCAAAA-GTAAATGCGTAA--T---TGGTGTATCTGTT  
 IES104 TAGAATGGT--TATCCATTGCTGTAATAAAATCA-AACTCCTCAAAAAAGTATATATGCAAT---TGGTACCAATGTT  
 IES76 -----  
 CTG13940 AAGAATAGT--TACCCATTCTGTAATAAAATTCG-AACTCCTTAAAAA-GTAAATGCGTAAA---TGGTACCATCTGTT  
 IES42 -----  
 CTG34100 AA-AATAAT--TATCCATTGCTGTAATAAAATCG-AACTCCTCAAGA-GTAAATATGTATA---T-ATGATATCTGTT  
 IES169 -----  
 IES103 ATGAATAGTTATATCCATTGCTGTAATAAAATCG-AACTCCTCAAAA-TTATAGGTGTGAA---TGGAGCTAATCTGTT  
 CTG2630 AATAATAGT--TATCAATTGCTGTAATGAAGTCC-----ATCTGTT  
 CTG45590 AAGAATAAT--TATCCATTGCTGTAATAAAATCGAAACTCCTCGAAAA-GTAAATGTGTAAT---TGGTACTATCTGTT  
**AnchoisB** 2767 AAGAATAGT--TATCTATTGCTGTAAT-AAATCG-AACTCCTCAAAA-TGTAAGGATAAA---TGGTAAATATCGTT

CTG36069 -----  
 IES85 CTTAC--TGGTTTTATG-GCTTATAAATCGCTAATTTGGAAATGTAATCAATAGGTA----TCTGGAGAACCTTTGGCTTG  
 IES57 -----  
 IES214 GTGAT--AGGTTTATTGAT-ATAAATGTGTTATCTGAAATGTAAAACAATAGGTA----CTTTGGGAATTTTGAATG  
 IES105 -----  
 IES47 TTGAT--GGAATTATT--TTTATAAATTTGTTATCGGAATGTGAAAACACTAGGTA----TTT--AGAATCTTGAATG  
 IES80 -----  
 CTG4797 -----  
 IES77b GTGAT--GGATTTTAT-TCTAATAAGTGTGTTATCGGAAATGTAATTAATAGGTA----TTTGGAAAATTTTGAATG  
 CTG826 GTGAT--GGGTTTATT-GCTTATAAATGTGTTATAGGAAATGTAATTAATCTGCATTTTFTTTGGAGAATTTTGAATG  
 IES132 -----  
 CTG7743 GTGAT--TGGTTTATT-TCTTATCAATTTCTTTTCGGATACGTAATTAATTTGGGA----GTTGGAGAA-TTTTGAATG  
 CTG43276 -----  
 IES42b -----  
 IES35 -----  
 IES104 GTGAT--GGATTTTATT-GATTATAAATGTGTTATCGGAAATGTAATCAATATA-A-----TTTGGAGAATTTTGAATG  
 IES76 -----  
 CTG13940 -----  
 IES42 -----  
 CTG34100 -----  
 IES169 -----  
 IES103 -----  
 CTG2630 -----  
 CTG45590 -----  
**AnchoisB** 2840 GTTATGGGGTTAATT-ACTTATAAATGCTTTATCGGAAATGTAATCAATAGGTA----TTTGAAGAATTTTGAATC

CTG36069 -----TCCATCCA  
 IES85 AACCAATT--AAGTGTGCTTTGGCAA--AGTACT-GAAGATAA-TAAATATAC-TTAGTGTGGATAATACCTCCATCCA  
 IES57 -----  
 IES214 AACTTTT--AAAGCTGCTTTAGCAA--AGTAAT-GAAAAAAATAACTTTT-GC-TTAGTGTGGATAATGCCTCCATCCA  
 IES105 -----  
 IES47 AATTTAT--AAAGCTGCTTTAGCAA--AATAAA-GAAGACAA-TAATTTT-GC-TTATCGCTTGATATGCGCTCCACCCA  
 IES80 AACTTTT--AAAGTGTGCTTTGGCAA--AATAAA-GAAGAAAA-TAATTTT-----GTTCA  
 CTG4797 AACTTTT--AAAGCGGCTTTAGAA-----  
 IES77b AACGTTT--AAAGCTGCTTTAGCAA--AGTAA--AAAAGAAA-TAATTTTTT-C-TTAGTGTGGATFGTGCCTCCATCCA  
 CTG826 AATTTT--TAATCTG--TTAGCAA--AATAGCGAAGCTAAA-TAATTTTTTCC-TTGGTGTGGATATATGC-----  
 IES132 -----  
 CTG7743 TTCTTTT--AAGGCTGC-TTAGCAA--AATAAT-GAAGGAAA-TAATTTTTGT-TTAATGTGCTATAATGCTTTCATCCA  
 CTG43276 -----  
 IES42b AACTTTTAAAAGTTTCTTTTGGCAA--AACAAAT-GAA-AAAA-TACTATATGCTTAAAT-CTGGA-AATTCCTCCATCCA  
 IES35 AACTTTA--AAAG-----GAAG--A--AATAAT-GTGGAAAA-TAATTTTTTGC-TAAGCCTGGATAATGCCTCCATCCA  
 IES104 AACTTTT--AAAGCTGAATTTAGAAAATAATAAA-CAAAAAAA-TAATTTTTTGC--TTAGTGTGGATAATAT-TACATCTA  
 IES76 AACTTTT--AAAGA-GCTTTAGCAA--AATAAT-GAAGAAAA-TAATTTTTT-GC-TTAG--AGGATAATGCCTTCATCCA  
 CTG13940 -----  
 IES42 AACTTTT--AAAGCTGCTTTAGCAA--AATAAT-AA-----AATTTTTTAC-TAAGTGTGCTGATAATTCCTCCATCCT  
 CTG34100 -----  
 IES169 AACTTTT--GAAGCTGCTTTTGGCAA--AATAAT-GACGAAAA-CAATTTTTTGC-TTAATGCATGTAAATGTCTCCATCCA  
 IES103 AACTTTT--TAGCTGCTTTAGCAA--CATAAT-GAAGTAAA-TAATTTTTTACTTTAGTGTGGATAAT-TCTCCAT---  
 CTG2630 AACTTTA-----AGCAA--AATAAT-GGAGAAAA-TAATTTTTT-C-TTAGTGTGGATAATGCCTCCATCCA  
 CTG45590 TAAFTTC--AAAGCTGCTTTAGCAA--AATAAT-GAAGAAAA-TAATTTTTTGC-TTAGTGTGGATAATGCCTCCATCCG  
**AnchoisB** 2912 AACTTTT--AAAGCTGCTTTAGCAA--AATAAT-GAAGAAAA-TAATTTTTTGC-TTAGTGTGGATAATGCCTCCATCCA

CTG36069 CTGGACATAT--AATCTGAA-TCAAATATCATCTGTAACTATTATTATCTTCC--CAATAGAGCCA--TCAG-CTTAA  
 IES85 TTAGACACAATAAATCTGAA--CAATTTATCACTTGCTTATCATTATT--TTTGC-----TTAA-CTTAA  
 IES57 -----TTTGT--TCTTCC-----  
 IES214 ATAGACTCAATAATTTCTTAT-TGAGTTATCATTATTAATTTATTATT-T-TTCTTCTATATGCCC--TTAGCCTTAA  
 IES105 -----TTAA-----  
 IES47 CTATACATA-TAAATCTGAA-TTAATTATCATTGTTAATTATTATT-T-TCTTCTCCATATAACCC--TTAG-CTTAA  
 IES80 CCTAATATAATAAATCTGAA-TCAATTATGATTTGTTAATTATTATT-TCTTCTCCAAATAGCCCCTTTAG-CTTAA  
 CTG4797 -----TCATTTATCTCTTGTAACTATTAT-TCAACATCCAAATAGCCT--TTAG-CTTAA  
 IES77b CCGAACATAATAAATTAATAA-TCAATTATCATTGTTAGTTTATT-TCTTCTCTATGTAGCCC--TTAG-CTTAA  
 CTG826 ---AATATAAATATTCTGAGTCAATTATGATTTTAAATTAGTTATT-TCTTCTCCATCTAGCAC--TTTG-TTTAA  
 IES132 -----  
 CTG7743 CCATACATAATAAACTGAA-TCAATTATCATTGTTAATTATTATT-TCTTCTCCATAGAGTCC--TTAA-GTTA  
 CTG43276 -----  
 IES42b CCGAACATAATA-----AATTATATTGTTAATTATATT-TCTTCTCCATATACCC--TTAG-CTTAG  
 IES35 TCTAACGTAATAAATCTGAA-TCAATTATCATGTGTTAATTATTATT-TTTCTCCATATAGCCC--TTAG-TTTAA  
 IES104 AGAACATATTAATTTCTGAA-TTATTTATCATTGTTAAATATTATT-TCTTCTCCATATAGCCC--TTAG-CTTAA  
 IES76 CTGAAATAATAAATCTGAA-TCAATTATCATTTTTAATTATTATT-TCTTCTCCATAGAGCCC--TTAA-CATAA  
 CTG13940 -----  
 IES42 TCAAACATAATA-GTCTGAA-TCAATTATCATTGTTAATTATTATT-TCTTCCCCATATAACCT--TTAA-CTTGA  
 CTG34100 -----  
 IES169 CCGAACATAATAAATCTGAA-TCAATTATCATTGGAATTATTATT-TCTACCTCCATATAGCCT--TTAG-TTTAA  
 IES103 -----CAATACATCTGAA-TCAATTATCATTGTTAATTATTATT-TCTTCTCCAAATAGCCT--TTAG-CTTAA  
 CTG2630 TCGAACATAA-----  
 CTG45590 CAGATCGGAATAAATCTGAA-TCAATTATCATTCTTAATTATTATT-CCTTCTCTTATAGCCC--TTAG-CTTAA  
**AnchoisB** 2985 CCGAACATAATAAATCTGAA-TCAATTATCATTGTTAATTATTATT-TCTTCTCCATATAGCCC--TTAG-CTTAA

CTG36069 CTGCATGTAAAGGCTTTGGGGAATTGCAAGTGATAGCTCTCTAAATATGTATGTTGCAA-----AAGTTCCTAA-GA  
 IES85 CTGCATCAAAAGGTTATTTGGAATTGC-AAGCAACAGCCTTCCAAAATACATCTTACAT-----CAATTTATTCA-GA  
 IES57 -----  
 IES214 TTGCATAGAAAAGGCTGTGGGTAATTGCAAGCGATAGCTCTCTAAAATGTATGTTGCAA-----CAAGGCTTAAACA  
 IES105 -----GGAGAAATTGCAAGCGAACTTCTTTAAATACCCATATTGCAA-----AAACGCCATAA--  
 IES47 TTGAATCGAAATGCTGTGCGGAATTGCAAGAGATAGCTTCTTAAATACATATTGCAA-----CAACTGCC--  
 IES80 ATGCATAGAAATGATGTG-AGAATGTCTAGCGATA--TCTCTAAAGAATCTATTGCAA-----CTACTGTCTAA-GA  
 CTG4797 CAGCATCGAAAAGTGTGTTGGAATTACTAGCGATAGCTCTCTAAAATGCTAGTTGCAA-----CATCTGGGTAA-TA  
 IES77b TTGCATCGAAATATATGGGTAATTGTTAAGCGATAGCTCTCTGAAATGCATATCGCAA-----CTACTACCTAA-GA  
 CTG826 CTGTATCGAAAAGGTTGCGGAATTCAAGCCA-AGCTCTCTAAAATTCATGTTGCA-----CAACTGCCTAA-GA  
 IES132 -----  
 CTG7743 CTGCATAGGAAGGCTGCGGGAATTGCAAGCGATAGCTCTCTAAAATGAATGTTTAA-----CAATTACCTAA-GA  
 CTG43276 -----  
 IES42b CTGCATAGAAATCTGTGGGGAATTGTTAAATTGATAGCTCTCTAAAATGCATATTTCAA-----GTACTGCCAAA-GA  
 IES35 TTGCATCGAATTAATTTGGAGAATTGCTA-----  
 IES104 CTGCATCGAAATGTTTGGGGAATTGCTAAGTGATAGCTC-----  
 IES76 CTGCATCGAAATGCTCTGGATAAATTGCTAGCGATAGCTC--TAAAATGCAAAATTGCAA-----CTACTGTCTAA-GA  
 CTG13940 -----  
 IES42 CTGCATCGAAATGCTGTGAGGAATTGCTAAGCGATAGCTCTCT-TAATGCATAGTGCAA-----CTACTACCAA-GA  
 CTG34100 -----  
 IES169 CCGCATCGAAA-----TGCTAAGCGATAGCTCTCTAAAATGCATAGTACAA-----CTATTACCTAA-GA  
 IES103 CTGCATCGAAATGCTGTGGGGAATTGCTAAGCGATAGCTCCTTAAAATGCATAGTTCAA-----CTACTACCTAA-GA  
 CTG2630 -----  
 CTG45590 CTGCATCGCAATGCTGTGGGGAATTGCTAAGCGATAGCTCTCTAAAATGCATAGTGAACACTACTATCTACTACCTAA-GA  
**AnchoisB** 3060 CTGCATCGAAATGCTGTGGGGAATTGCTAAGCGATAGCTCTCTAAAATGCATATTGCAA-----CTACTGCCTAA-GA

CTG36069 ATTTGATAATATAC-GTGTGTGCTAAACCCTATTACATCAACAAGCTTA----AAA-CAAATGGATTTCAAACCTAA  
 IES85 ATTTTATAATACAC-ATGTCATGCTTAACTCTATTACATCAACTCTAGTTAAGTTCAAAAATCTGCAAAATCAAACCTAA  
 IES57 -----  
 IES214 ATTTTCATAACATAA-GTGTGTGCTTAACTTATATAA-----  
 IES105 ATTTTATAAATTTACAAATGTTGTAAT-----  
 IES47 -----  
 IES80 ATTTTATAAATTTAA-ATGTTGAGCATAAECTCTATTACAACAACCTCAAGTTCA----AA-T-CATCTGCAATTCAAACCTAA  
 CTG4797 ATTTTAT-ATATAC-ATATTGTGCTTAAATCTATTAAATCAACTTCAGTTTA----AAA-CATCTGCAATTCAAA-CTAA  
 IES77b ATTTTATAATATAT-ATGTTGCGCTTAACTCTATTACAACAACCTCAAGTTCA----AAA-CATCTGCAATTCAAACCTAA  
 CTG826 ATTTTCATAACATAC-GTGTGTGCTTAACTCTATTACATCAACTCAAGCTCA----GAA-AATCTGCAATTCAAAATCTAA  
 IES132 -----  
 CTG7743 ATTTTCATAATATTC-ATTTGTGCTTTACTCTATTACATCAACCCTCAAGTTCA----AA-----  
 CTG43276 -----  
 IES42b -TTTTATAATATAC-ATTTGCTCTTAACTCTATTATAAATAAAACAAGTTCA----AAA--ATCTAAACTTCAAACCTTA  
 IES35 -----  
 IES104 -----CTAA  
 IES76 ATTTTATACTAAAC-AGTTGCGCTTAAATCTATTACAATAAATTCAGTTGA----AAA-CATCTGTACTTCACCCAA  
 CTG13940 -----ATAATATAC-ATGTTGTGCTTAAATCTATTAAAAAECTCAAGTTCA----AA--CATCTGCAATTTAACCAA  
 IES42 AGTTTA-AAATACAC-ATGTTGTGCTTAACTCTATTACAATAAECTCAAGTTAA----AAA-CATCTGCAAAATCAAACCTAA  
 CTG34100 -----  
 IES169 ATTTTATAATATAC-ATGTTGTGCTTAACTCTATTACAACAACCTCAAGCTCA----AAACCATCTCTACTTCAAATTTAA  
 IES103 ATTTTATAATATAC-ATGTTGTGCTTAACTCTATTACAACAAGCTCAAGTTCA----AAA-AATCTGCAATTCAAAATCTAA  
 CTG2630 -----  
 CTG45590 GAAATAT-ATATAC-ATATTGTGCTTAACTCTATTACAACAACCTCAAGTTCA----AAA-CATCTGCAATTCAAAATCTAA  
**AnchoisB** 3132 ATTTTATAATATAC-ATGTTGTGCTTAACTCTATTACAACAACCTCAAGTTCA----AAA-CATCTGCAATTCAAAACCTAA

CTG36069 AATTCCTAGAAGTTTGCTTGTACAAAAATAATCTGATGGTA-TAA-----TTTCATA  
 IES85 A-TTCCTAGAACTTTCCTGTTACAAAAATAATCTGATG-AA-TTATATACAGTCTAATTTTAAATTAAGTATCACA  
 IES57 -----  
 IES214 -----GTTG-GACAAATAATCTGATGCTA-ATATATACAATTCAAATTTTAAATCAAATTTTCA  
 IES105 -----  
 IES47 -----  
 IES80 AATTCCTAAAGCTTGTATTAC-AAAAATAATCTGATGCTA-TTATATACAATTTAAATTTTAAATATAAGTTTCAAT  
 CTG4797 AATTCATAAAGCATGCTTGTACGAAAAATAATTTGATGCTA-TTGTATACAATTCAAATTTTAAATCTCAAATTTTCA  
 IES77b AATT--AGA--TTGATTGTTAAGAAAAATAATCTGATGCTA-TTATATACAATTTAAATTTTAAATCAAATTTT-  
 CTG826 AATTC-AAAACTTACTTATTA-AAAAATGATTTTGAACCTA-TTAGATACAGTCTGAAATTTTAAATCAAAGTTTCA  
 IES132 -----  
 CTG7743 -----CATATTACGAAAAATAATCTGATGTTA-TTAT-----  
 CTG43276 -----TTTAGTATAAAGTTTAAAT  
 IES42b AATTCCTAGATGATAGCTTATTACGAAAAATAATCTGATGCTA-TTA-----  
 IES35 -----  
 IES104 AATTCCTAGA-----  
 IES76 AACACCTGGAAGTTTCTTGTAAAGAAAAATAATCTGATGCTA-TTATATACAATTCAAATTTTAAATATAAAGTTTCA  
 CTG13940 A-TTCCTAGATGCTTGTATTGAAAAATAATTTGATGCTA-TTATATACAATTCAAATTTTAAATATAAAGTTTCA  
 IES42 AATTCCTAGAAGTTGGCTTTTACGAAAAATAATCTGATGCTA-TTATATACAATTTAAATTTAATAAGTTTCAAT  
 CTG34100 -----  
 IES169 AATTCCTAGAAGCTTGTGTAC-AAAAATAATCTGATGCTA-TTATATACAATTTAAATTTTAAATATAAAGTTTCAAT  
 IES103 AATTCCTAGAAGCTTACTT-TTAAAGAAAAATAATCTGATGCTA-TTATATACAATTTAAATTTTAAATATAAGTTTCAAT  
 CTG2630 -----AACTCTGATGCTA-TTATATAGAATTTAAATTT-  
 CTG45590 ACTTCCTGGAAGCTTGTGTTTCGAAAAATAATCTGATGCTA-TTATATACAATTTAAATTTTGAATAAAGTTTCAAT  
**AnchoisB** 3206 AATTCCTAGAAGCTTGTGTACGAAAAATAATCTGATGCTA-TTATATACAATTTAAATTTTAAATATAAAGTTTCAAT

CTG36069 AGTAAATGAGCAA-AGGTGTCCTTTATTCTTAACAGTGATGGTGTAGCAATACATATTGTTAGTCTGTAAGTTTAA  
 IES85 AGT-AAATGAGCAA-AGGTCTCTGATTTCTTCTAATAGTGATGGTGTAACTGCAGATTGGTATCTGGAAATGCTTAA  
 IES57 -----  
 IES214 -----  
 IES105 AGTAAATGAGCAA-AGGTCTCC-----TCTCGAATAGCTATTTTATAGAACTGCAGATTGTTAGTCTGGAAATCTTT  
 IES47 -----  
 IES80 AGTAAATAGTAAA-AGTTCTCCGATTCTTTTGAAATGAGATGGTGTAGCAACTACAATTTGTTAGTCTGGAATGCTTTA  
 CTG4797 AATAAATAATCGAA-ATTTCTCCGATTCTTTTCGAATAGGGATGTTGTAGCCACTGCAGATTCTTATCTGGAAATGCTTAA  
 IES77b AATAAACGAAACAAA-AATTTCTCCATTTTTCGAATGGCT-----TAGCAGATTGTTAGTCTGGAAATGCTTTA  
 CTG826 AATTAATAAACAAA-AGGTCTCTCTCTTTTCGAATAGCTATCTGTAGTAACTGTAATTTGTTAGTCTAGGAATGCTTTA  
 IES132 -----  
 CTG7743 -----  
 CTG43276 AGTAAATGAGCAA-AGGTCTCCGATTCTTTTCGAATAGC-ATGGTGTAGCAACTGCAGCTCGTTATCTAGAAATGCTTTA  
 IES42b -GTAATGAGCAA-ACGTTTCCGATTCTTTTC-----CACTGCAGTTTGTAGTCTGGAAATGCTTTA  
 IES35 -----  
 IES104 -----  
 IES76 AGTAAATGAGCAA-ATGCTCCGATTCTTTTCGAATAGCGATGCTGTAGCAACTTTAGATTGTTAATCTAGAAATGCTTTA  
 CTG13940 ACTAAATAGCAA--AAGCTCTCTATTTTTCGAATAGCCATGGTGTAGCAACTACAATTTGCTAGTATGGTATCTTTA  
 IES42 TTT-AAATAGCAA-ATGCTCTAGATTCTTTTCGAATAGCGATGGCTGAGCAACTGCAGATTGTTAGTCTGGAAATCTTTCA  
 CTG34100 -----  
 IES169 TGTAATGAGCAAATAATCTCCAATTTCTTTTAATAATTTGAGTGTGTAACAACCTGCAGATTGTAAGTCTGGAAATGCTTTA  
 IES103 AGTAAATAGCAA-AAGCTCCGATTCTTTCTTAATAGCGATGGCTGAGAACTGCAGATTGTTAGTCTGGAAATGCTTTA  
 CTG2630 AGTAAATGAGCAA-AAGTCTCTTAAATAGTGTGATGAGTATCAACTGCAAAATTTAGTCTGGAAATGCTTTA  
 CTG45590 AGTAAATGAGCAA-AGGTCTCCGATTCTTTTCGAATAGTGTGATGGTGTAGCAACT-----  
**AnchoisB** 3285 AGTAAATGAGCAA-AGGTCTCCGATTCTTTTCGAATAGCGATGGTGTAGCAACTGCAGATTGTTAGTCTGGAAATGCTTTA

CTG36069 ACAC---CAAGCAGAAATTTATTCAAAGCAGAGCTTCAAATTTGGG-GACCGAAGGAGAGCTAAATCACTTACTCAAACATC  
IES85 ACACTTTCAAGCAAAATTTTAGTCGAAGCAGAGTTTCAAATTTGGGGATAGAAAGGAGTTGAATCACTCACTCCTTAATC  
IES57 -----  
IES214 ---CTTTCAAACAGATCTTA-TCGAAGAGAGTTTTGAATTTGGGAAACAGAAAGTTAGGAAATCACTCTATCGTTAATC  
IES105 ACACTTTCA---AGCACTTTCTAAATTTGGGGATTTGAAAGGTC-----  
IES47 -----  
IES80 ACACTTTCAAGCAGA-----GTTTCGAATTTGGGGAGCGGAAAGGGGGCTAAATCACTTCTCCTTAATC  
CTG4797 ACCTTTCAAGCAGATTTAATCGAAGCAGAGTTTCGAATTTGGGACCCAAAGGGAGCTAAATCACTTCGCTCCTTAATC  
IES77b ACAATTTCAAGCAGATTTTAGTCAAAGCAAAGTTTTGAATTCGTTGGACCGAAAGAGAGCTAAATCGCTCACTCCTTAAT  
CTG826 AAC-TTCAAGCAGATTTTAGTCTAAGAAAGTTTTCTAACTGGAGGACTGAAAAGAACTA-----  
IES132 -----  
CTG7743 -----  
CTG43276 ACACTTTCAAGCAGA-----GTTTCGAATTTGGG-GACCTAAAGGGAGCTAAATCACTCACTCCTTAATC  
IES42b ACACTTTCAAGCAGATTTTAGTTCGAAGCAGAGTTTCAAATTTGGAGGAC-----CTAAATCACTCGCTCCTTAATC  
IES35 -----GACCAAAGGAAACTA-----  
IES104 -----AGATTTTATTCGAAGCAGAGTTTCGAATTCGGGGCACAGAAAGGA--CTAAATCACTCGCTCCTTAAT  
IES76 ACACTTTCAAGCAGATTTTAGTCAAAGCAGAGTTTCGAATTTGGGACCCAAAGGGAG-TAAATTCGCTCACT-TTTGATA  
CTG13940 ATATTTTCAAACAGATTTTAGTCAAAGTAGAGTTTCGAATTTGGGGATTCGAAGGGAACTAAATCACTCG-----C  
IES42 ACAATTTCAAGCAGATTTTAGTCAAAGCAGAGTTTCGAATTTGGGGACAGAAAGGGAGCTGTTTCCT--GTCTCATTC  
CTG34100 -----  
IES169 ACACTTTCAAGCGATTTTAGTTGAAGCAGAGTTTCGAATTTGGGGACCGAAAG-GAGCTAAATCAGTCGCTCTTTAATC  
IES103 ACCCATTTCAAGTAGAT-----TTTCGAATTTGGAGGACCTAAAGGGAGCTAAATCACTCGTTCATTAATC  
CTG2630 ACCTTTCAAGCAGATTTTAGTCAAAGCAGAGTTTCGAATTTGGGGAAACAGAGAGTAAGCTAAATTCACCTCCTCCTAATC  
CTG45590 -----GCAGATTTTAGTCAAAGCAGAGTTTCGAATTTGGGGACCGAAAGGGAGCTAAATCACTCGTCACTTAATC  
**AnchoisB** 3364 ACACTTTCAAGCAGATTTTAGTCAAAGCAGAGTTTCGAATTTGGGGACCGAAAGGGAGCTAAATCACTCGCTCCTTAATC

CTG36069 TATCCAACC---AACTCTCAATATAACA-AGCCTTTCATTTTATTATATAG-TTTAATT--TTATAAAAAATAACATTATG  
IES85 TACTGAGCCA--GCCACTTAGTATAAAACAGTCTTTCACCTTTATTTAT-G-TTTTTT-----AA-TAAAAATATG  
IES57 -----  
IES214 -----AAATCTCACTAGAAATA-AGCCTTTCATTTTATA-----G-TTTTTCTATTGTAAAAA---AAATTATG  
IES105 -----  
IES47 -----  
IES80 TATCCAGTC---AACTCTCAATATAACT-AGCCTTTCGATTTTATTATATG-TTT-----  
CTG4797 AATCCAGCC---AACTCTCAATATACAC-AGTCTTAATTTGTTATTAATAG--TGTTTATTATAACA-TAAAAATTATG  
IES77b TCACCAGCC---AACTCTCAGTATACAG-AGCCGTCATTTTAAATTTATCGTTTTTTTGTATAT-AAAA-TAAATGATG  
CTG826 -----ATCGTTCAATATAATA-AGCCTTTCATTTAT-----TTACAAAT---AAATTTTG  
IES132 -----  
CTG7743 -----  
CTG43276 TATCCAGCT---AAATCTCAAGATAACA-AGCCTTTCATTTTATTATATAG--TTTTTGATTATAAAAA-TAAAAATTATG  
IES42b TATCCAGCC---AACTCTCAATATAACA-CTTATTTTCATTTTATTATATAG-TTTTTTGATTATAAAAA-TAAAAATTATG  
IES35 -----TATAACA-AGCCTC-----CGTTTTATTATAAAAA-GAAATTTATG  
IES104 CATTCAGCCAAAACCTCAATATGACA-AGCCTTTCATTTTATTATATAGTTTTTTGATTATAAAAA-TAAAAATTATG  
IES76 TATCCAGCA---AACTCTCAATATAA-A-ACCTCTTATTTTACTTATA--TTCTTTGATTATAAAAA---CAATTATG  
CTG13940 TATCCAGTC---AACTTCTCAATATAAAA-TGGCTGTCATTTTATTATTTAA--TTTTTGATTATAAAAA-TAAAAATTATG  
IES42 TATCCAGCC---AACTCTCAATATCATA-AGCCTTTCATTTTAAATTTATAG-TGTTTTGATTATAAAAA-TAAATTTAAG  
CTG34100 -----  
IES169 TATCCAGCC---AACTCTCAATATAACA-AGCCTTTCATTTTATTATATAG-TTTTTTGATTAT-AAAA-TAAATTTATG  
IES103 TATCCAGC-----CAATTTAACA-AGCC-TTCATTTTATTATATAG-ATTTTTTATTATAAAAA-TAAAAATTATG  
CTG2630 TATCCAGCA---AAATCTCAATATAACA-AGCCTTTCATTTCTATTTCTAG-TTTTTTGATTATAAAAA-TAAAAATTATG  
CTG45590 TATCCAGCA---AACTCTCAATATAACA-AGCCTTTCATTTTATA-TTATAG-TTTTTTGATTATAAAAA-T-AAATTTAT  
**AnchoisB** 3444 TATCCAGCC---AACTCTCAATATAACA-AGCCTTTCATTTTATTATATAG-TTTTTTGATTATAAAAA-TAAAAATTATG

CTG36069 GGTTTGTGTAATTCATATATAGATTATATGTAATAATAGATTAAAT-CTT-----ATAATAAAAATAATATCGAGAAGTCT  
IES85 GGTTCGTGTGATTAATGATGATTATAAATAAATAATAGATTATGATTATGTCACGATAAAAATAATATAATAAAGTCT  
IES57 -----AATCGATA-----TCT  
IES214 -----TAGATATAAAAATAGATTTATAAATT-----ATFATAAAAATATATCAGGCAGTCT  
IES105 AGTTTTTGTACACTTGAGTAATAATATAAAGTAGATGTAG-TTA-----ATAATAAAAATAATACAGTAGTTT  
IES47 --TTTGTGTGATTCCTTTGTGATAATATATAAATAATAGATTAT-ATT-----ATAATAAAAATAATATCAGGAAGTCT  
IES80 GGTTTGTGTTGATTCGTGATGATTATAT-----AAAATAGATTTA-----GAAACA---CAGGAAGTTT  
CTG4797 AGTTTTGTGATTCATGAGTGAATATAAATAAATAGATTAT-ATT-----ATAAAAATAAATAATATCAGGAAGTCTG  
IES77b GGTTTGTGATCTATGAGTGTTTTATAT-AAAATAGATTAT-CTAT-----CTTAAAGAAATAATATC--TAAGTTT  
CTG826 GG-----GAGTAAATTATTTATAAATAATAGATTAT-ATT-----ATAAA--AAFTAATACAAAGAGTCT  
IES132 -----  
CTG7743 -----  
CTG43276 GGTTTGTGATTAATGACTGATTAATATAAATAATCGATTAT-ATT-----ATGAAAGAAATAATATTAAGAAGTCT  
IES42b GGTTTGTGCGATTCATGAGTGAATATATAAGAAATAGATTAT-TTT-----ATAAAAATAAATAATCAGGATTTT  
IES35 GGTTTATGTGATACATGAGTGAATATTTAAAAATAGATTTTT-ATT-----ATAATAAAAATAATATCAGGAAGTCT  
IES104 GGTTTGTGATATATGAGTGAATTCGATAGAAATAGATTAT-ATA-----ATFAAAGAAATAATATCAGGAAGTCT  
IES76 GGTTTGTGATTCATGAGTGAATATAAATAAATAATAGATTAT-ATT-----CTAAAA-AAATAATATCAGGAATCT  
CTG13940 GGTTTATGTGATTCAGAGTGAATATATAAATAATCAATTTAT-ATT-----ATAAAAATAAATAATATCAGGAAGTCT  
IES42 GGTTTGTGCGATTCATGAGTGAATATAAATAAATAATCGATTAT-ATT-----ATA-ATGAAATAATATCAGGAAGTCT  
CTG34100 -----  
IES169 GGTTTAAGTGAATTCATGAGTGAATTTATAAATAATCGATTAT-ATT-----ATAAAGAAATAATATTAAGATG---  
IES103 AGTTTATATGATTCATGAGTGAATTTATAAATAAATAATCGATTAT-ATT-----ATAAAAATAAATAATATCAGGAATCT  
CTG2630 GGTTTGTGATTCATGAGTGAATATAAATAAATAATCGATTAT-ATT-----ATAAAAATAAATAATATCAGGATCT  
CTG45590 GGTTTGTGATTCATGAGTGAATATAAATAAATAATCGATTAT-ATT-----TTAAAAGAAATAATATCAGGATGCT  
**AnchoisB** 3518 GGTTTGTGATTCATGAGTGAATATAAATAAATAATAGATTAT-ATT-----ATAAAAATAAATAATATCAGGAAGTCT

CTG36069 GAAGAAGTATATTAAATCGTATTGGACTATA  
 IES85 GAAGGAGTAGATGAAATTGTATTGGACGATA  
 IES57 AATTAAAGGAGTCAAACCTTTAATTGA-----  
 IES214 GAAGAAGT----GCCATTGTTTTGAACTATA  
 IES105 GAAAAGTGTGTGAAATTTATTGGACTATA  
 IES47 GAAGTAGTAGATAAAATTGAATTCAACTATA  
 IES80 GAAGAAGTAGATGACATTGTTTGGACTATA  
 CTG4797 GAAATAGTAGATGAAATTGCATTGGACTATA  
 IES77b GAAAAGTAGATGAAATTTAATTGGTCTATA  
 CTG826 TAAGAGGTAGATGAAATT-TATTGTA CTATA  
 IES132 -----TAGATGAAATTGGATTGGACTATA  
 CTG7743 -----  
 CTG43276 ---GAAGTAGAT-AAACATAATTGGACTATA  
 IES42b GAAGAAGTAGATGAAATTTATTGGACTATA  
 IES35 GAAGAAATAGATGAAATTGTATTGGACTATA  
 IES104 GA-GAAGTAGATGAAATTTATTAGACTATA  
 IES76 GAAGAAGTAGATCAAATTTATTGGACTATA  
 CTG13940 AGAGAAGTAGATAAAATTGTATTGGACTATA  
 IES42 AAAGAAGTAGATAAAATTGTATTGGGCTATA  
 CTG34100 --AAAGT-----  
 IES169 GATGAAGTAGCTAAACCTGTATTGGACTATA  
 IES103 GAAGAGGTAGATAAAACCTGTATTGGACTATA  
 CTG2630 GAAGAAGTAGATAAAATTGTATTGGACTATA  
 CTG45590 GAAGAAGTAGATAAAATTGTATTGGACTATA  
**AnchoisB** 3591 GAAGAAGTAGATGAAATTGTATTGGACTATA

| <b>E</b> | <b>IES<br/>(ParameciumDB Accession)</b> | <b>IES Size<br/>(nt)</b> | <b>Element</b> | <b>Alignment<br/>Label</b> | <b>Alignment<br/>Length (nt)</b> |
|----------|-----------------------------------------|--------------------------|----------------|----------------------------|----------------------------------|
|          | IESPGM.PTET51.1.98.309432               | 2003                     | A              | IES98                      | 1226                             |
|          | IESPGM.PTET51.1.128.254421              | 3392                     | A              | IES128                     | 3394                             |
|          | IESPGM.PTET51.1.77.209216               | 4154                     | A              | IES77                      | 3258                             |
|          | IESPGM.PTET51.1.103.177611              | 2462                     | B              | IES103                     | 2464                             |
|          | IESPGM.PTET51.1.104.49056               | 2238                     | B              | IES104                     | 2240                             |
|          | IESPGM.PTET51.1.105.239361              | 2483                     | B              | IES105                     | 2295                             |
|          | IESPGM.PTET51.1.132.167159              | 1500                     | B              | IES132                     | 1502                             |
|          | IESPGM.PTET51.1.169.56908               | 3272                     | B              | IES169                     | 3274                             |
|          | IESPGM.PTET51.1.214.11549               | 2317                     | B              | IES214                     | 2319                             |
|          | IESPGM.PTET51.1.35.111752               | 2820                     | B              | IES35                      | 2766                             |
|          | IESPGM.PTET51.1.42.397702               | 2473                     | B              | IES42b                     | 2262                             |
|          | IESPGM.PTET51.1.42.72890                | 3389                     | B              | IES42                      | 3391                             |
|          | IESPGM.PTET51.1.47.408041               | 2125                     | B              | IES47                      | 2127                             |
|          | IESPGM.PTET51.1.57.48117                | 1257                     | B              | IES57                      | 1099                             |
|          | IESPGM.PTET51.1.76.220822               | 3048                     | B              | IES76                      | 2890                             |
|          | IESPGM.PTET51.1.77.311405               | 3470                     | B              | IES77b                     | 2755                             |
|          | IESPGM.PTET51.1.80.84925                | 1513                     | B              | IES80                      | 1515                             |
|          | IESPGM.PTET51.1.85.45587                | 3479                     | B              | IES85                      | 2959                             |

**IESs used to build the final *AnchoisA* and *AnchoisB* consensus sequences.**
